# Supplementary material for: Comparative Transcriptome and Proteome Analysis of Salt-Tolerant and Salt-Sensitive Sweet Potato and Overexpression of IbNAC7 Confers Salt Tolerance in Arabidopsis
Source: Front Plant Sci. 2020 Aug 27;11:572540. doi: 10.3389/fpls.2020.572540 (PMC7481572; doi:10.3389/fpls.2020.572540)
Supplement: Supplementary file 12 [file Table_11.xlsx]

## Sheet: Table S11 -The quantitative inf
Supplementary Table S11. The quantitative information of the RNA-seq data of transgenic Arabidopsis under control (C) and salt-treated (S) conditions.
sample	raw_reads	clean_reads	clean_bases	error_rate	Q20	Q30	GC_pct	total_map	unique_map	multi_map
Col_C1	44305934	43126522	6.47G	0.03	97.91	93.95	45.82	42222372(97.9%)	41406880(96.01%)	815492(1.89%)
Col_C2	45888712	44575040	6.69G	0.03	97.83	93.66	45.48	43608604(97.83%)	42707510(95.81%)	901094(2.02%)
Col_S1	48364212	46311474	6.95G	0.03	97.97	93.96	45.1	45442350(98.12%)	44580828(96.26%)	861522(1.86%)
Col_S2	55070094	53136628	7.97G	0.02	98.05	94.13	45.51	52070586(97.99%)	51090963(96.15%)	979623(1.84%)
NAC7_8_C1	54485486	52921400	7.94G	0.02	98.41	95.09	46.08	52208374(98.65%)	51209375(96.76%)	998999(1.89%)
NAC7_8_C2	65069244	63293144	9.49G	0.02	98.36	94.96	46.03	62365828(98.53%)	61156621(96.62%)	1209207(1.91%)
NAC7_8_S1	54746246	53526844	8.03G	0.02	98.37	94.95	45.21	52764316(98.58%)	51778285(96.73%)	986031(1.84%)
NAC7_8_S2	53326906	52030422	7.8G	0.02	98.16	94.43	45.14	51145747(98.3%)	50217070(96.51%)	928677(1.78%)
