# Supplementary material for: Comparative Transcriptome and Proteome Analysis of Salt-Tolerant and Salt-Sensitive Sweet Potato and Overexpression of IbNAC7 Confers Salt Tolerance in Arabidopsis
Source: Front Plant Sci. 2020 Aug 27;11:572540. doi: 10.3389/fpls.2020.572540 (PMC7481572; doi:10.3389/fpls.2020.572540)
Supplement: Supplementary file 13 [file Table_12.xlsx]

## Sheet: Table S12 -Different genes in A
Supplementary Table S12. Differential expressed genes in the transgenic plants compared with WT plants under control (C) and salt-treated (S) conditions.
gene_id	NAC7_8_S1	NAC7_8_S2	Col_S1	Col_S2	NAC7_8_S	Col_S	log2FoldChange	pvalue	padj	gene_name	gene_chr	gene_start	gene_end	gene_strand	gene_length	gene_biotype	gene_description	tf_family
AT2G14610	1923.48	167.029	1.05986	4.13349	1045.26	2.59668	8.65029	5.98e-07	9.39e-05	PR1	2	6241640	6242541	-	902	protein_coding	PF00188:Cysteine-rich secretory protein family	SCP
AT2G01422	44.5778	189.806	0	2.06675	117.192	1.03337	6.81112	9.62e-08	2.14e-05	-	2	183940	184734	+	795	ncRNA	-	-
AT1G28650	22.7631	8.54126	0	0	15.6522	0	6.34535	0.00170178	1	-	1	10069365	10071108	-	1366	protein_coding	PF00657:GDSL-like Lipase/Acylhydrolase	Lipase_GDSL
AT3G46190	9.48464	16.1335	0	0	12.8091	0	6.05613	0.00363762	1	-	3	16965105	16967345	+	1078	protein_coding	PF00917:MATH domain	MATH
AT4G10860	23.7116	0	0	0	11.8558	0	5.94455	0.0320168	1	-	4	6678666	6679508	-	843	protein_coding	-	-
AT4G14504	9.48464	11.3883	0	0	10.4365	0	5.76061	0.00839026	1	MIR852A	4	8336166	8336373	+	208	miRNA	-	-
novel.144	10.4331	7.59223	0	0	9.01266	0	5.549	0.0151357	1	-	3	8859226	8859723	-	301	-	PF00069:Protein kinase domain	Pkinase
AT2G31335	224.786	112.934	4.23944	3.10012	168.86	3.66978	5.52597	1.53e-13	1.95e-10	-	2	13360883	13361383	+	501	protein_coding	-	-
AT1G14880	1880.8	194.551	4.23944	43.4017	1037.68	23.8206	5.44455	0.00242143	0.0476103	PCR1	1	5132506	5133860	-	938	protein_coding	PF04749:PLAC8 family	-
AT4G27140	4.74232	11.3883	0	0	8.06533	0	5.38876	0.0245741	1	AT2S1	4	13607329	13608031	+	703	protein_coding	PF00234:Protease inhibitor/seed storage/LTP family	-
AT1G53610	8.53617	7.59223	0	0	8.0642	0	5.38857	0.0223055	1	-	1	20008996	20009320	-	285	protein_coding	-	-
AT2G04435	9.48464	5.69417	0	0	7.5894	0	5.30103	0.0282602	1	-	2	852856	853345	+	490	lncRNA	-	-
AT2G07629	29.4024	10.4393	0	1.03337	19.9208	0.516687	5.25264	0.00502684	1	-	2	3312873	3313502	-	568	protein_coding	-	-
AT2G07655	3.79385	9.49028	0	0	6.64207	0	5.10866	0.0451476	1	-	2	3245323	3246203	+	678	protein_coding	-	-
AT3G06095	3.79385	9.49028	0	0	6.64207	0	5.10866	0.0451476	1	-	3	12458778	12459124	-	347	lncRNA	-	-
AT3G13280	7.58771	5.69417	0	0	6.64094	0	5.10843	0.0420748	1	-	3	4295327	4297000	-	1152	protein_coding	PF01936:NYN domain	DUF88
AT3G14320	8.53617	4.74514	0	0	6.64066	0	5.10837	0.0431787	1	ATL61	3	4777594	4778345	-	752	protein_coding	PF13639:Ring finger domain	-
AT1G11370	8.53617	4.74514	0	0	6.64066	0	5.10837	0.0431787	1	PME56	1	3827851	3831068	-	1237	protein_coding	PF01095:Pectinesterase	-
AT1G02440	23.7116	11.3883	0	1.03337	17.55	0.516687	5.06986	0.00714594	1	ATARFD1A	1	496372	497555	-	952	protein_coding	PF00025:ADP-ribosylation factor family	Arf
AT3G19550	21.8147	9.49028	1.05986	0	15.6525	0.52993	4.89978	0.0111649	1	-	3	6787127	6788424	-	927	protein_coding	-	-
AT3G25180	18.0208	9.49028	1.05986	0	13.7555	0.52993	4.71321	0.01641	1	CYP82G1	3	9167138	9169301	-	1991	protein_coding	PF00067:Cytochrome P450	p450
AT2G34000	9.48464	11.3883	1.05986	0	10.4365	0.52993	4.31428	0.0362579	1	-	2	14364931	14365743	+	813	protein_coding	PF13639:Ring finger domain	-
AT3G25830	9.48464	25.6238	2.11972	0	17.5542	1.05986	4.06023	0.0130014	1	TPS27	3	9447409	9451037	+	2660	protein_coding	PF01397:Terpene synthase, N-terminal domain|PF03936:Terpene synthase family, metal binding domain	-
AT1G29071	17.0723	17.0825	0	2.06675	17.0774	1.03337	4.03575	0.0107681	1	SNOR105	1	10151668	10151774	-	107	snoRNA	-	-
AT2G02250	21.8147	23.7257	0	3.10012	22.7702	1.55006	3.86678	0.00496053	1	PP2B2	2	594484	595869	-	1148	protein_coding	PF00646:F-box domain|PF14299:Phloem protein 2	F-box
novel.222	36.0416	9.49028	1.05986	2.06675	22.766	1.5633	3.86108	0.00569018	1	-	5	22461795	22462526	+	638	-	PF14368:Probable lipid transfer	-
AT3G22231	342.395	39.8592	9.53874	17.5673	191.127	13.553	3.81677	7.97e-06	0.000763916	PCC1	3	7845823	7846833	-	773	protein_coding	-	-
AT3G22235	1446.41	533.354	25.4367	116.771	989.881	71.1039	3.79897	0.000808883	0.0229727	-	3	7854419	7855814	-	687	protein_coding	-	-
AT2G17740	1884.6	853.177	81.6093	120.905	1368.89	101.257	3.75647	1.69e-20	6.89e-17	-	2	7706896	7707954	-	1059	protein_coding	PF03107:C1 domain	-
AT3G57240	536.83	88.2596	20.1373	26.8677	312.545	23.5025	3.73274	1.61e-07	3.3e-05	BG3	3	21181642	21183144	-	1399	protein_coding	PF00332:Glycosyl hydrolases family 17	Glyco_hydro_17
AT1G59950	118.558	32.267	5.2993	6.20024	75.4125	5.74977	3.71265	2.07e-05	0.00160423	-	1	22068033	22070588	-	963	protein_coding	PF00248:Aldo/keto reductase family	Aldo_ket_red
AT3G46880	14.227	13.2864	2.11972	0	13.7567	1.05986	3.70822	0.0269714	1	-	3	17265234	17266266	+	521	protein_coding	-	-
novel.185	14.227	13.2864	2.11972	0	13.7567	1.05986	3.70822	0.0269714	1	-	4	13620173	13620669	+	424	-	-	-
AT1G51913	7.58771	30.3689	1.05986	2.06675	18.9783	1.5633	3.5987	0.0134963	1	-	1	19292909	19293339	+	345	protein_coding	-	-
AT4G06065	8.53617	16.1335	1.05986	1.03337	12.3348	1.04662	3.55904	0.0308669	1	-	4	7809070	7809438	+	369	lncRNA	-	-
AT1G70270	17.0723	32.267	3.17958	1.03337	24.6697	2.10648	3.55468	0.00379802	0.0639897	-	1	26464226	26464919	+	694	protein_coding	-	-
novel.109	677.203	826.604	33.9155	95.0703	751.903	64.4929	3.5419	3.25e-16	7.38e-13	-	3	5814364	5816670	+	1903	-	-	-
AT1G53640	9.48464	25.6238	1.05986	2.06675	17.5542	1.5633	3.48609	0.0149302	1	-	1	20020885	20025541	-	953	protein_coding	-	-
AT3G57260	1311.73	138.558	59.3522	73.3695	725.142	66.3608	3.44981	0.0098967	0.11958	BGL2	3	21188397	21189967	-	1477	protein_coding	PF00332:Glycosyl hydrolases family 17	Glyco_hydro_17
AT5G43285	60.7017	29.4199	1.05986	7.23361	45.0608	4.14674	3.43619	0.000667036	0.0203195	LURE1.1	5	17370473	17370857	-	287	protein_coding	-	-
AT5G25920	11.3816	21.8277	1.05986	2.06675	16.6046	1.5633	3.4058	0.0161958	1	-	5	9044140	9046528	-	1859	protein_coding	-	-
AT3G02242	17.0723	16.1335	3.17958	0	16.6029	1.58979	3.39319	0.0246017	1	GLV8	3	420107	420936	+	593	protein_coding	-	-
AT3G23550	1337.33	390.051	41.3346	135.372	863.692	88.3532	3.28896	0.00271052	0.0514872	DTX18	3	8448273	8450799	-	1722	protein_coding	PF01554:MatE	MatE
AT3G28510	116.661	33.216	1.05986	14.4672	74.9385	7.76354	3.26707	0.00120566	0.0298487	-	3	10685470	10687429	+	1960	protein_coding	PF00004:ATPase family associated with various cellular activities (AAA)|PF14363:Domain associated at C-terminal with AAA	AAA
novel.148	19.9177	9.49028	2.11972	1.03337	14.704	1.57655	3.22451	0.0279531	1	-	3	10180600	10182138	-	519	-	-	-
AT4G18650	15.1754	13.2864	3.17958	0	14.2309	1.58979	3.17019	0.0451086	1	DOGL4	4	10263969	10265439	-	790	protein_coding	PF14144:Seed dormancy control	-
AT1G12940	88.2071	51.2475	5.2993	11.3671	69.7273	8.3332	3.06216	3.31e-05	0.00222506	NRT2.5	1	4416315	4418590	+	1852	protein_coding	PF07690:Major Facilitator Superfamily	MFS_1
AT1G64360	150.806	118.629	15.8979	17.5673	134.717	16.7326	3.00882	2.6e-09	9.84e-07	-	1	23887809	23888615	+	706	protein_coding	-	-
AT1G21240	256.085	59.7888	15.8979	23.7676	157.937	19.8327	2.99268	2.54e-05	0.0018568	WAK3	1	7434235	7436830	+	2422	protein_coding	PF07714:Protein tyrosine kinase|PF07645:Calcium-binding EGF domain|PF13947:Wall-associated receptor kinase galacturonan-binding	Pkinase_Tyr
AT5G08855	20.8662	28.4709	0	6.20024	24.6685	3.10012	2.98591	0.0218505	0.194079	-	5	23683085	23683567	+	483	lncRNA	-	-
AT2G31081	16.1239	25.6238	5.2993	0	20.8738	2.64965	2.98442	0.0312662	1	CLE4	2	13238021	13238628	+	608	protein_coding	-	-
AT1G78360	4.74232	36.0631	2.11972	3.10012	20.4027	2.60992	2.96542	0.0338441	1	ATGSTU21	1	29481869	29483009	-	907	protein_coding	PF13410:Glutathione S-transferase, C-terminal domain|PF02798:Glutathione S-transferase, N-terminal domain	GST_N
AT4G00960	29.4024	35.1141	5.2993	3.10012	32.2582	4.19971	2.94347	0.00205178	0.0424922	-	4	414204	416355	+	1472	protein_coding	PF07714:Protein tyrosine kinase	Pkinase_Tyr
AT1G64195	24.6601	15.1845	3.17958	2.06675	19.9223	2.62316	2.92678	0.0149418	1	-	1	23827521	23828048	-	409	protein_coding	-	-
AT1G76190	19.9177	18.9806	4.23944	1.03337	19.4492	2.63641	2.88789	0.0200246	1	-	1	28592059	28592820	+	762	protein_coding	PF02519:Auxin responsive protein	Auxin_inducible
AT1G06087	26.557	27.5218	3.17958	4.13349	27.0394	3.65654	2.88541	0.00452422	0.0722708	-	1	9515628	9515750	+	123	snoRNA	-	-
AT5G20790	195.384	158.488	11.6585	36.1681	176.936	23.9133	2.88492	2.38e-07	4.2e-05	-	5	7039674	7040919	-	1246	protein_coding	-	-
AT4G04465	38.887	45.5534	4.23944	7.23361	42.2202	5.73653	2.8776	0.000589817	0.0188189	-	4	1445731	1445846	-	116	snoRNA	-	-
ATCG00710	9.48464	19.9296	1.05986	3.10012	14.7071	2.07999	2.81801	0.0453945	1	PSBH	Pt	74485	74706	+	222	protein_coding	-	-
AT3G49620	760.668	382.458	94.3276	69.236	571.563	81.7818	2.80549	4.61e-12	3.77e-09	DIN11	3	18393747	18397050	+	1538	protein_coding	PF14226:non-haem dioxygenase in morphine synthesis N-terminal|PF03171:2OG-Fe(II) oxygenase superfamily	2OG-FeII_Oxy
AT3G21500	256.085	336.905	13.7782	71.3028	296.495	42.5405	2.79952	5.11e-06	0.000537776	DXPS1	3	7573560	7576721	-	2426	protein_coding	PF02780:Transketolase, C-terminal domain|PF02779:Transketolase, pyrimidine binding domain|PF13292:1-deoxy-D-xylulose-5-phosphate synthase	-
AT2G02310	47.4232	68.33	7.41902	9.30036	57.8766	8.35969	2.79061	0.000111554	0.00570295	PP2B6	2	608586	610283	-	1250	protein_coding	PF00646:F-box domain|PF14299:Phloem protein 2	F-box
AT1G53625	243.755	302.74	12.7183	67.1693	273.248	39.9438	2.7725	7.87e-06	0.000758123	-	1	20014379	20015038	-	660	protein_coding	-	-
AT3G04115	25.6085	24.6747	6.35916	1.03337	25.1416	3.69627	2.77098	0.0146213	0.15181	-	3	7472090	7472467	+	342	lncRNA	-	-
AT2G25735	295.921	235.359	18.0176	59.9357	265.64	38.9766	2.76701	2.04e-07	3.69e-05	-	2	10974655	10975916	-	1262	protein_coding	-	-
AT1G18980	33.1962	50.2985	6.35916	6.20024	41.7474	6.2797	2.733	0.000992556	0.0261523	-	1	6557181	6558115	-	935	protein_coding	PF00190:Cupin	-
AT1G64160	37.9385	52.1966	7.41902	6.20024	45.0676	6.80963	2.72711	0.000602254	0.0190963	DIR5	1	23813943	23814839	+	897	protein_coding	PF03018:Dirigent-like protein	-
AT5G19890	374.643	552.335	110.225	29.9678	463.489	70.0967	2.72621	2.88e-07	4.9e-05	PER59	5	6724076	6725966	-	1372	protein_coding	PF00141:Peroxidase	-
AT5G46295	21.8147	33.216	1.05986	7.23361	27.5153	4.14674	2.72536	0.0147166	0.152538	-	5	18779790	18780205	-	416	protein_coding	-	-
AT5G41890	18.9693	36.0631	4.23944	4.13349	27.5162	4.18647	2.71655	0.00780162	0.10278	-	5	16764211	16766702	-	1231	protein_coding	PF00657:GDSL-like Lipase/Acylhydrolase	Lipase_GDSL
AT1G76470	82.5163	54.0946	16.9578	4.13349	68.3055	10.5456	2.69865	0.000545529	0.0176821	-	1	28689766	28691659	-	1421	protein_coding	PF01370:NAD dependent epimerase/dehydratase family	Epimerase
AT5G50530	74.9286	5.69417	4.23944	8.26699	40.3114	6.25321	2.68724	0.0253988	0.213785	CBSCBSPB4	5	20571681	20575250	-	2085	protein_coding	PF00571:CBS domain|PF00564:PB1 domain	CBS
AT5G36907	587.099	435.604	115.525	45.4684	511.352	80.4966	2.66836	1.57e-09	6.41e-07	-	5	14550119	14550859	-	606	protein_coding	-	-
AT3G23450	4458.73	6107.95	510.853	1162.55	5283.34	836.699	2.65853	7.6e-13	8.17e-10	-	3	8410048	8412213	+	2166	protein_coding	-	-
AT2G31141	34.1447	43.6553	0	12.4005	38.9	6.20024	2.64524	0.0252159	0.212707	-	2	13271726	13272534	-	673	protein_coding	-	-
AT2G28850	41.7324	36.0631	8.47888	4.13349	38.8977	6.30619	2.62733	0.00210465	0.0431063	CYP710A3	2	12383480	12385051	-	1572	protein_coding	PF00067:Cytochrome P450	p450
AT3G02705	28.4539	36.0631	4.23944	6.20024	32.2585	5.21984	2.62618	0.00405721	0.0667592	-	3	4372837	4373081	-	245	lncRNA	-	-
AT1G60740	95.7948	121.476	16.9578	18.6007	108.635	17.7792	2.61091	7.17e-07	0.000110081	PRXIID	1	22360977	22362003	+	825	protein_coding	PF08534:Redoxin	-
AT3G18250	203.92	179.366	13.7782	49.6019	191.643	31.6901	2.59434	6e-06	0.000612638	-	3	6258060	6258426	-	367	protein_coding	-	-
AT1G08757	196.332	116.731	13.7782	38.2348	156.531	26.0065	2.58761	9.91e-06	0.000907464	-	1	24339371	24340154	+	784	lncRNA	-	-
AT3G54410	19.9177	17.0825	1.05986	5.16687	18.5001	3.11336	2.56643	0.0389725	1	-	3	20144398	20145489	+	1092	protein_coding	PF06651:Protein of unknown function (DUF1163)	-
AT1G67148	80.6194	73.0752	10.5986	15.5006	76.8473	13.0496	2.5567	2.79e-05	0.00200362	-	1	25121211	25121947	+	498	protein_coding	-	-
AT1G51820	1401.83	1039.19	104.926	314.145	1220.51	209.536	2.54175	1.47e-08	4.16e-06	-	1	19237219	19241965	-	2928	protein_coding	PF13855:Leucine rich repeat|PF12819:Carbohydrate-binding protein of the ER|PF00069:Protein kinase domain	Pkinase
AT2G30770	45.5263	20.8786	2.11972	9.30036	33.2024	5.71004	2.53615	0.0137631	0.145556	CYP71A13	2	13109909	13111988	-	1494	protein_coding	PF00067:Cytochrome P450	p450
AT1G65484	50.2686	91.1067	15.8979	9.30036	70.6877	12.5991	2.48964	0.000290401	0.0111955	-	1	24347750	24348619	+	646	protein_coding	-	-
AT5G19880	30.3508	37.9611	5.2993	7.23361	34.156	6.26646	2.44532	0.0048194	0.0750095	PER58	5	6720384	6722477	-	1250	protein_coding	PF00141:Peroxidase	-
AT1G18200	191.59	276.167	51.9332	34.1013	233.878	43.0172	2.44372	9.19e-09	2.84e-06	RABA6B	1	6265416	6267076	-	991	protein_coding	PF00071:Ras family	Ras
AT1G49700	147.96	241.053	7.41902	64.0691	194.507	35.7441	2.44256	0.00120593	0.0298487	-	1	18388792	18390523	-	1147	protein_coding	PF09713:Plant protein 1589 of unknown function (A_thal_3526)	-
AT2G19190	2549.47	1657	218.331	560.088	2103.24	389.21	2.43374	5.64e-09	1.89e-06	SIRK	2	8326049	8329944	-	2700	protein_coding	PF00069:Protein kinase domain|PF13855:Leucine rich repeat|PF12819:Carbohydrate-binding protein of the ER	Pkinase
AT1G14550	24.6601	31.3179	2.11972	8.26699	27.989	5.19335	2.42642	0.0178984	0.172155	PER5	1	4978922	4980466	+	1214	protein_coding	PF00141:Peroxidase	-
AT3G05770	19.9177	30.3689	2.11972	7.23361	25.1433	4.67667	2.42313	0.0231747	0.201889	-	3	1710013	1712225	-	1608	protein_coding	-	-
AT1G08903	25.6085	30.3689	6.35916	4.13349	27.9887	5.24633	2.41696	0.0108815	0.126269	-	1	25119573	25119824	-	252	lncRNA	-	-
AT5G57760	26.557	23.7257	6.35916	3.10012	25.1413	4.72964	2.41265	0.0169253	0.166695	-	5	23400715	23401267	+	553	protein_coding	-	-
AT5G07995	50.2686	60.7378	8.47888	12.4005	55.5032	10.4397	2.40923	0.000533842	0.0173584	-	5	21692759	21693073	-	315	lncRNA	-	-
AT1G66465	111.919	115.781	19.0775	23.7676	113.85	21.4225	2.40923	1.31e-06	0.000176775	-	1	24788868	24790516	+	1302	protein_coding	-	-
AT5G45090	35.0932	54.0946	12.7183	4.13349	44.5939	8.42591	2.40685	0.00452479	0.0722708	PP2A7	5	18202617	18205000	-	1299	protein_coding	PF14299:Phloem protein 2|PF01582:TIR domain	TIR
AT3G23240	36.9901	39.8592	0	14.4672	38.4246	7.23361	2.40574	0.0450981	0.287603	ERF1B	3	8295617	8296604	+	988	protein_coding	PF00847:AP2 domain	AP2
AT5G64810	41.7324	24.6747	5.2993	7.23361	33.2036	6.26646	2.40459	0.0074455	0.099761	WRKY51	5	25908247	25909881	+	947	protein_coding	PF03106:WRKY DNA -binding domain	WRKY
AT3G02240	165.033	212.582	50.8733	20.6675	188.808	35.7704	2.40173	2.43e-06	0.000291326	RGF7	3	418357	419323	+	739	protein_coding	-	-
AT3G45860	179.26	30.3689	19.0775	20.6675	104.814	19.8725	2.39888	0.00297575	0.0545906	CRK4	3	16863088	16866261	-	2564	protein_coding	PF01657:Salt stress response/antifungal|PF07714:Protein tyrosine kinase	Pkinase_Tyr
AT2G41850	20.8662	17.0825	2.11972	5.16687	18.9744	3.64329	2.37785	0.039523	1	ADPG2	2	17461655	17464242	-	1748	protein_coding	PF00295:Glycosyl hydrolases family 28	-
AT5G48175	38.887	42.7063	9.53874	6.20024	40.7966	7.86949	2.37555	0.00275994	0.0522316	-	5	19539145	19540623	+	1358	protein_coding	-	-
AT3G21351	938.031	914.863	145.201	211.842	926.447	178.521	2.37511	1.75e-17	4.46e-14	-	3	7518784	7519477	+	596	protein_coding	-	-
AT5G27060	355.674	152.794	36.0353	62.0024	254.234	49.0188	2.374	4.53e-06	0.000494132	AtRLP53	5	9521978	9525478	-	3267	protein_coding	PF08263:Leucine rich repeat N-terminal domain|PF13855:Leucine rich repeat	LRRNT_2
AT3G14260	81.5679	91.1067	27.5564	6.20024	86.3373	16.8783	2.35743	0.00105644	0.0270333	-	3	4747769	4748859	-	990	protein_coding	PF04525:LURP-one-related	-
AT1G76960	726.523	231.563	71.0106	116.771	479.043	93.8909	2.35074	7.71e-06	0.000749511	-	1	28920317	28920976	-	548	protein_coding	-	-
AT5G37820	29.4024	23.7257	3.17958	7.23361	26.564	5.2066	2.34849	0.017638	0.170713	NIP4;2	5	15050002	15051599	+	1168	protein_coding	PF00230:Major intrinsic protein	-
AT2G21220	24.6601	22.7767	2.11972	7.23361	23.7184	4.67667	2.33897	0.0286633	0.228512	-	2	9089226	9090052	+	827	protein_coding	PF02519:Auxin responsive protein	Auxin_inducible
AT1G09993	31.2993	16.1335	4.23944	5.16687	23.7164	4.70315	2.33354	0.0253237	0.213506	-	1	30397172	30397804	-	633	lncRNA	-	-
AT2G22122	685.739	801.929	151.56	143.639	743.834	147.599	2.33339	2.86e-19	8.33e-16	-	2	9403067	9403835	+	769	protein_coding	-	-
AT1G53542	36.9901	36.0631	1.05986	13.4339	36.5266	7.24686	2.32973	0.02693	0.222096	-	1	19981628	19981813	+	186	protein_coding	-	-
AT5G47000	28.4539	38.9102	5.2993	8.26699	33.682	6.78314	2.3105	0.00791184	0.103485	PER65	5	19068803	19070333	-	1531	protein_coding	PF00141:Peroxidase	-
AT1G67865	902.937	671.912	104.926	213.908	787.425	159.417	2.30376	9.2e-10	4.18e-07	-	1	25445994	25447622	-	1073	protein_coding	-	-
AT3G53235	43.6293	38.9102	12.7183	4.13349	41.2697	8.42591	2.29512	0.00665824	0.092743	-	3	19733838	19734695	-	345	protein_coding	-	-
AT3G48180	97.6918	99.648	13.7782	26.8677	98.6699	20.3229	2.27774	4.93e-05	0.00297157	-	3	17790312	17790919	-	608	protein_coding	-	-
AT3G22240	888.71	945.232	204.553	176.707	916.971	190.63	2.26634	1.55e-20	6.89e-17	-	3	7863606	7864895	-	621	protein_coding	-	-
AT1G07550	33.1962	37.0121	7.41902	7.23361	35.1042	7.32632	2.26056	0.00626121	0.089159	-	1	2322543	2326570	-	2819	protein_coding	PF12819:Carbohydrate-binding protein of the ER|PF00069:Protein kinase domain|PF13855:Leucine rich repeat	Pkinase
AT5G50760	220.992	273.32	49.8134	53.7354	247.156	51.7744	2.25491	7.64e-10	3.6e-07	-	5	20644525	20645698	+	1174	protein_coding	PF02519:Auxin responsive protein	Auxin_inducible
AT1G51850	4395.18	2860.37	624.258	895.935	3627.78	760.096	2.25473	2.78e-14	4.36e-11	-	1	19252811	19256927	-	2955	protein_coding	PF13855:Leucine rich repeat|PF12819:Carbohydrate-binding protein of the ER|PF00069:Protein kinase domain	Pkinase
AT5G46730	632.625	584.602	92.2079	163.273	608.613	127.74	2.2516	3.19e-11	2.03e-08	-	5	18963977	18965222	+	1246	protein_coding	-	-
AT2G44370	887.762	839.89	192.895	171.54	863.826	182.217	2.24528	3.53e-20	1.2e-16	-	2	18321951	18323121	-	1171	protein_coding	PF03107:C1 domain	-
AT4G34810	116.661	70.2281	19.0775	20.6675	93.4446	19.8725	2.23313	9.24e-05	0.00493784	-	4	16598958	16599568	+	611	protein_coding	PF02519:Auxin responsive protein	Auxin_inducible
AT1G18835	52.1655	60.7378	13.7782	10.3337	56.4517	12.056	2.22817	0.000878895	0.024197	MIF3	1	6495844	6496491	-	648	protein_coding	-	-
AT5G36925	584.254	524.813	79.4895	158.106	554.533	118.798	2.222	2e-09	7.76e-07	-	5	14565476	14566439	-	879	protein_coding	-	-
AT3G01375	16.1239	32.267	6.35916	4.13349	24.1954	5.24633	2.20665	0.0321457	0.241438	-	3	1009803	1010048	+	246	lncRNA	-	-
AT1G65390	1766.04	977.499	181.236	417.483	1371.77	299.359	2.1958	2.29e-07	4.06e-05	PP2A5	1	24292372	24294740	+	1732	protein_coding	PF14299:Phloem protein 2|PF01582:TIR domain	TIR
AT1G15625	30.3508	46.5024	10.5986	6.20024	38.4266	8.39942	2.19531	0.00782744	0.102838	-	1	5374755	5375910	+	978	protein_coding	-	-
AT5G28630	159.342	127.17	22.2571	40.3016	143.256	31.2793	2.19395	7.76e-06	0.000751057	-	5	10636612	10637384	+	773	protein_coding	-	-
AT5G53980	127.094	145.201	41.3346	18.6007	136.148	29.9676	2.18535	3e-05	0.00206978	ATHB-52	5	21913883	21914866	+	984	protein_coding	PF00046:Homeobox domain	Homeobox
AT4G25110	367.055	172.723	36.0353	82.6699	269.889	59.3526	2.18409	3.62e-05	0.00236737	AMC2	4	12887474	12890262	-	1830	protein_coding	PF00656:Caspase domain|PF06943:LSD1 zinc finger	Peptidase_C14
AT5G62150	173.569	250.544	24.3768	69.236	212.056	46.8064	2.17832	4.32e-05	0.00268527	-	5	24958125	24958813	+	689	protein_coding	-	-
AT4G13395	53.114	59.7888	6.35916	18.6007	56.4514	12.4799	2.17488	0.00338319	0.0594021	DVL10	4	7785428	7786161	-	734	protein_coding	-	-
AT5G16170	210.559	122.425	47.6937	26.8677	166.492	37.2807	2.16002	2.06e-05	0.00159904	-	5	5277787	5279821	+	1445	protein_coding	PF02485:Core-2/I-Branching enzyme	-
AT5G24655	80.6194	87.3106	18.0176	19.6341	83.965	18.8259	2.15681	8.41e-05	0.00469079	LSU4	5	8440601	8441364	-	764	protein_coding	-	-
AT1G52200	4832.42	3816.99	615.779	1334.08	4324.71	974.932	2.14911	1.3e-09	5.55e-07	PCR8	1	19441636	19443631	-	1798	protein_coding	PF04749:PLAC8 family	-
AT5G66595	43.6293	35.1141	8.47888	9.30036	39.3717	8.88962	2.14667	0.00578736	0.0848979	-	5	26581123	26583426	-	391	protein_coding	-	-
AT1G06160	453.366	276.167	81.6093	83.7032	364.766	82.6562	2.14174	7.34e-09	2.38e-06	ERF094	1	1882907	1883992	+	1086	protein_coding	PF00847:AP2 domain	AP2
AT1G13470	207.714	67.381	12.7183	49.6019	137.547	31.1601	2.14085	0.00389673	0.0649031	-	1	4620101	4621585	-	1404	protein_coding	PF06880:Protein of unknown function (DUF1262)	-
AT5G46370	27.5054	37.0121	7.41902	7.23361	32.2588	7.32632	2.1386	0.0124605	0.136577	TPK2	5	18809496	18811870	-	1609	protein_coding	PF07885:Ion channel	Ion_trans_2
AT1G33840	38.887	48.4005	8.47888	11.3671	43.6437	9.923	2.13602	0.00425512	0.0692347	-	1	12283725	12285371	-	1141	protein_coding	PF04525:LURP-one-related	-
AT1G28480	92.9494	131.915	20.1373	31.0012	112.432	25.5693	2.1355	4.72e-05	0.00288008	GRXC9	1	10013434	10014256	-	823	protein_coding	PF00462:Glutaredoxin	-
AT1G47890	61.6501	29.4199	4.23944	16.534	45.535	10.3867	2.12966	0.0168016	0.166105	AtRLP7	1	17643976	17647107	+	3132	protein_coding	PF08263:Leucine rich repeat N-terminal domain|PF13855:Leucine rich repeat	LRRNT_2
AT3G26815	19.9177	20.8786	3.17958	6.20024	20.3982	4.68991	2.11875	0.0473075	1	MIR169K	3	9875525	9875737	-	213	miRNA	-	-
AT2G43140	148.909	126.221	25.4367	38.2348	137.565	31.8357	2.11037	6.21e-06	0.000627934	-	2	17931254	17935748	-	2848	protein_coding	PF00010:Helix-loop-helix DNA-binding domain	HLH
AT5G44568	758.771	607.378	125.064	192.207	683.075	158.635	2.10582	2.47e-11	1.7e-08	-	5	17961019	17962276	-	718	protein_coding	-	-
AT4G04745	596.584	802.878	162.159	168.44	699.731	165.299	2.08166	1.71e-13	2.06e-10	-	4	2412618	2413447	-	830	protein_coding	-	-
AT1G65850	20.8662	50.2985	12.7183	4.13349	35.5824	8.42591	2.08063	0.0287951	0.229238	-	1	24494678	24498826	+	3658	protein_coding	PF01582:TIR domain|PF07725:Leucine Rich Repeat|PF00931:NB-ARC domain	NB-ARC
AT4G19370	119.506	69.2791	12.7183	32.0346	94.3927	22.3764	2.075	0.00121448	0.0299648	-	4	10566068	10567838	-	1152	protein_coding	PF06749:Protein of unknown function (DUF1218)	-
AT1G53633	77.774	79.7184	7.41902	29.9678	78.7462	18.6934	2.07238	0.0037307	0.0634841	-	1	20017389	20017932	-	451	protein_coding	-	-
AT1G19960	428.706	437.502	54.0529	151.906	433.104	102.979	2.07152	6.48e-06	0.000648726	-	1	6927736	6928656	+	921	protein_coding	-	-
AT1G02450	31.2993	25.6238	5.2993	8.26699	28.4615	6.78314	2.06763	0.0223604	0.196895	NIMIN-1	1	497917	498539	-	623	protein_coding	PF15699:NPR1 interacting	-
AT5G64905	56.9078	92.0558	21.1972	14.4672	74.4818	17.8322	2.06336	0.000892098	0.0243864	PEP3	5	25939562	25940080	+	519	protein_coding	-	-
AT2G15042	168.827	100.597	31.7958	33.0679	134.712	32.4319	2.05431	3.19e-05	0.00215951	-	2	6510841	6512641	+	1726	protein_coding	PF13855:Leucine rich repeat	-
AT5G36920	214.353	202.143	52.993	47.5352	208.248	50.2641	2.05098	3.42e-08	8.62e-06	-	5	14564089	14565010	-	591	protein_coding	-	-
AT3G46270	103.383	109.138	34.9754	16.534	106.26	25.7547	2.04634	0.00020097	0.00890198	-	3	17000328	17004344	-	2079	protein_coding	PF12819:Carbohydrate-binding protein of the ER	-
AT1G32510	17.0723	30.3689	4.23944	7.23361	23.7206	5.73653	2.04634	0.0432649	0.282065	ANAC011	1	11756691	11758118	+	1161	protein_coding	PF02365:No apical meristem (NAM) protein	NAM
novel.250	17.0723	30.3689	5.2993	6.20024	23.7206	5.74977	2.04408	0.0405357	0.272911	-	Mt	107017	110245	+	3174	-	-	-
novel.88	27.5054	19.9296	5.2993	6.20024	23.7175	5.74977	2.04389	0.0363708	0.257739	-	2	5046126	5047400	-	1129	-	PF07794:Protein of unknown function (DUF1633)	-
AT1G04370	32.2478	15.1845	5.2993	6.20024	23.7161	5.74977	2.04384	0.0447574	0.28628	ERF14	1	1175033	1175768	+	736	protein_coding	PF00847:AP2 domain	AP2
AT1G53990	21.8147	42.7063	8.47888	7.23361	32.2605	7.85625	2.03829	0.021272	0.190599	GLIP3	1	20151016	20152752	+	1104	protein_coding	PF00657:GDSL-like Lipase/Acylhydrolase	Lipase_GDSL
AT4G16240	132.785	119.578	25.4367	36.1681	126.181	30.8024	2.03348	1.51e-05	0.00122156	-	4	9192116	9192568	-	349	protein_coding	-	-
AT5G39580	1104.96	1266	244.828	334.813	1185.48	289.82	2.03194	8.71e-15	1.62e-11	PER62	5	15847065	15849141	-	1294	protein_coding	PF00141:Peroxidase	-
AT3G29780	96.7433	87.3106	33.9155	11.3671	92.027	22.6413	2.02509	0.00140536	0.0329264	RALFL27	3	11671637	11672239	+	603	protein_coding	PF05498:Rapid ALkalinization Factor (RALF)	-
AT5G47740	192.538	220.175	57.2325	44.4351	206.356	50.8338	2.02187	1.48e-07	3.08e-05	-	5	19338511	19339775	+	1010	protein_coding	PF00582:Universal stress protein family	Usp
AT1G06983	22.7631	44.6043	4.23944	12.4005	33.6837	8.31996	2.01498	0.0305998	0.235525	-	1	13838401	13839087	-	447	lncRNA	-	-
AT5G38250	66.3925	35.1141	12.7183	12.4005	50.7533	12.5594	2.01481	0.00566711	0.0841618	LRK10L-2.3	5	15280467	15282769	-	2099	protein_coding	PF00069:Protein kinase domain|PF13947:Wall-associated receptor kinase galacturonan-binding	Pkinase
AT3G50260	353.777	422.318	75.2501	116.771	388.047	96.0106	2.01427	5.81e-09	1.91e-06	ERF011	3	18634546	18635514	+	969	protein_coding	PF00847:AP2 domain	AP2
AT1G14870	2277.26	2383.01	588.223	570.422	2330.14	579.322	2.008	4.18e-24	4.27e-20	PCR2	1	5128344	5129731	-	1092	protein_coding	PF04749:PLAC8 family	-
AT2G15220	192.538	300.842	76.31	46.5018	246.69	61.4059	2.00703	3.25e-06	0.000376991	-	2	6608561	6609681	+	1121	protein_coding	PF04450:Peptidase of plants and bacteria	-
AT1G66600	26.557	23.7257	7.41902	5.16687	25.1413	6.29294	1.99936	0.0339292	0.248239	WRKY63	1	24848320	24849543	+	1020	protein_coding	PF03106:WRKY DNA -binding domain	WRKY
AT3G07195	460.953	340.701	83.729	116.771	400.827	100.25	1.99886	5.64e-09	1.89e-06	-	3	2288732	2290515	+	1206	protein_coding	-	-
AT1G51890	1153.33	818.063	179.116	314.145	985.697	246.631	1.99843	5.43e-09	1.88e-06	-	1	19274604	19278798	-	3339	protein_coding	PF12819:Carbohydrate-binding protein of the ER|PF12799:Leucine Rich repeats (2 copies)|PF07714:Protein tyrosine kinase	Pkinase_Tyr
AT4G32810	88.2071	146.15	37.0951	21.7008	117.179	29.398	1.99601	0.000245252	0.00987781	CCD8	4	15828228	15831492	+	2104	protein_coding	PF03055:Retinal pigment epithelial membrane protein	RPE65
AT4G03460	434.396	323.619	93.2677	97.1371	379.008	95.2024	1.99308	7.75e-10	3.6e-07	-	4	1537118	1540713	-	3111	protein_coding	PF13962:Domain of unknown function|PF12796:Ankyrin repeats (3 copies)	-
AT3G20470	6792.9	8518.48	1500.76	2387.09	7655.69	1943.93	1.9775	1.17e-12	1.14e-09	GRP5	3	7140294	7141353	-	1060	protein_coding	-	-
ATMG00160	27.5054	34.165	8.47888	7.23361	30.8352	7.85625	1.97314	0.0206922	0.188295	COX2	Mt	40502	42628	-	783	protein_coding	PF02790:Cytochrome C oxidase subunit II, transmembrane domain|PF00116:Cytochrome C oxidase subunit II, periplasmic domain	-
AT5G44578	367.055	313.179	90.0881	83.7032	340.117	86.8957	1.96883	4.26e-10	2.29e-07	-	5	17977172	17978643	+	671	protein_coding	-	-
AT1G49000	419.221	430.859	55.1127	162.24	425.04	108.676	1.96678	2.96e-05	0.00205388	-	1	18123071	18124289	-	1219	protein_coding	-	-
AT1G13550	18.0208	42.7063	5.2993	10.3337	30.3635	7.81652	1.95611	0.0396072	0.270133	-	1	4636984	4638330	-	1270	protein_coding	PF06880:Protein of unknown function (DUF1262)	-
AT5G43580	2748.65	2577.56	746.142	633.458	2663.1	689.8	1.94896	1.3e-20	6.89e-17	-	5	17507801	17508752	-	681	protein_coding	PF00280:Potato inhibitor I family	-
AT2G39518	1089.78	1108.47	251.187	321.379	1099.12	286.283	1.94057	2.22e-15	4.53e-12	-	2	16495819	16497145	-	943	protein_coding	PF04535:Domain of unknown function (DUF588)	-
AT1G30250	93.8979	110.087	30.736	22.7342	101.993	26.7351	1.93243	0.00012968	0.00636555	-	1	10646842	10647650	-	809	protein_coding	-	-
AT5G61160	2289.59	533.354	360.353	381.315	1411.47	370.834	1.92835	0.0419255	0.277764	ACT	5	24608605	24610329	+	1725	protein_coding	PF02458:Transferase family	-
AT1G61120	56.9078	74.0242	11.6585	22.7342	65.466	17.1963	1.92705	0.00291144	0.053721	GES	1	22523635	22528836	+	2926	protein_coding	PF01397:Terpene synthase, N-terminal domain|PF03936:Terpene synthase family, metal binding domain	-
AT1G51830	1415.11	1693.07	474.817	343.08	1554.09	408.949	1.9263	1.51e-13	1.95e-10	-	1	19242654	19246154	-	2597	protein_coding	PF12819:Carbohydrate-binding protein of the ER|PF13855:Leucine rich repeat|PF00069:Protein kinase domain	Pkinase
novel.69	127.094	70.2281	9.53874	42.3683	98.6611	25.9535	1.92484	0.00827895	0.106913	-	2	6509204	6510792	+	1589	-	-	-
AT5G64890	49.3201	57.8907	18.0176	10.3337	53.6054	14.1757	1.92041	0.00482945	0.0750095	PEP2	5	25934568	25935612	+	675	protein_coding	PF17232:Family of unknown function (DUF5306)	-
AT3G30842	26.557	48.4005	7.41902	12.4005	37.4787	9.90975	1.91783	0.0205429	0.187391	ABCG38	3	12593810	12600432	-	4406	protein_coding	PF00005:ABC transporter|PF08370:Plant PDR ABC transporter associated|PF14510:ABC-transporter extracellular N-terminal|PF01061:ABC-2 type transporter	ABC2_membrane
AT4G25400	125.197	156.59	58.2923	16.534	140.893	37.4131	1.91451	0.00160054	0.0361138	-	4	12981016	12982584	+	1342	protein_coding	PF00010:Helix-loop-helix DNA-binding domain	HLH
AT1G70260	46.4747	94.9028	19.0775	18.6007	70.6888	18.8391	1.9078	0.00322762	0.0578648	-	1	26456774	26459570	-	1653	protein_coding	PF00892:EamA-like transporter family	DUF6
AT3G46280	11620.6	9499.77	2294.6	3349.16	10560.2	2821.88	1.90386	7.64e-14	1.11e-10	-	3	17005423	17008528	-	1783	protein_coding	PF12819:Carbohydrate-binding protein of the ER	-
AT2G04795	64.4955	68.33	14.838	20.6675	66.4128	17.7528	1.90251	0.00153391	0.034919	-	2	1682856	1683614	+	759	protein_coding	-	-
AT1G49860	447.675	734.548	224.69	91.9702	591.111	158.33	1.901	2.23e-05	0.00170575	GSTF14	1	18458526	18459969	+	1188	protein_coding	PF02798:Glutathione S-transferase, N-terminal domain|PF00043:Glutathione S-transferase, C-terminal domain	GST_C
AT1G11185	68.2894	68.33	15.8979	20.6675	68.3097	18.2827	1.90089	0.0012356	0.0302892	-	1	3749510	3750035	+	526	ncRNA	-	-
AT5G38790	46.4747	43.6553	15.8979	8.26699	45.065	12.0824	1.90079	0.00997804	0.120349	-	5	15533713	15534371	+	659	protein_coding	-	-
AT3G50460	26.557	32.267	11.6585	4.13349	29.412	7.89598	1.8997	0.0403678	0.272746	HR2	3	18727666	18728810	+	953	protein_coding	PF05659:Arabidopsis broad-spectrum mildew resistance protein RPW8	-
AT3G25882	273.158	223.022	37.0951	96.1037	248.09	66.5994	1.89621	9.04e-05	0.00492221	NIMIN-2	3	9470357	9471039	-	683	protein_coding	-	-
AT5G13080	145.115	150.896	42.3944	37.2014	148.005	39.7979	1.89521	6e-06	0.000612638	WRKY75	5	4149738	4151201	-	810	protein_coding	PF03106:WRKY DNA -binding domain	WRKY
AT1G66100	76.8256	74.0242	26.4965	14.4672	75.4249	20.4819	1.88215	0.00151947	0.0347452	-	1	24605538	24606722	-	992	protein_coding	PF00321:Plant thionin	-
AT1G69490	155.548	102.495	32.8557	37.2014	129.022	35.0286	1.88073	8.34e-05	0.00466575	NAC029	1	26122080	26123514	+	1252	protein_coding	PF02365:No apical meristem (NAM) protein	NAM
AT5G65600	87.2587	55.0437	18.0176	20.6675	71.1512	19.3425	1.87877	0.00192468	0.0408969	LECRK92	5	26215991	26218623	-	2633	protein_coding	PF00139:Legume lectin domain|PF00069:Protein kinase domain	Pkinase
AT4G15270	70.1863	75.9223	25.4367	14.4672	73.0543	19.9519	1.87382	0.00168325	0.0373204	-	4	8716504	8717914	-	1353	protein_coding	-	-
AT5G18661	51.217	40.8082	14.838	10.3337	46.0126	12.5859	1.87122	0.00856477	0.109171	-	5	6222337	6222811	-	475	protein_coding	-	-
AT1G63580	51.217	33.216	15.8979	7.23361	42.2165	11.5658	1.8698	0.0182111	0.174525	CRRSP6	1	23577329	23578486	+	1058	protein_coding	PF01657:Salt stress response/antifungal	-
AT5G40590	203.92	199.296	87.9684	22.7342	201.608	55.3513	1.86606	0.00135906	0.0321575	-	5	16251318	16252434	-	1117	protein_coding	PF03107:C1 domain	-
AT3G19660	540.624	521.017	114.465	176.707	530.82	145.586	1.86579	2.79e-09	1.04e-06	-	3	6825433	6826585	-	1153	protein_coding	-	-
AT5G45080	170.723	242.951	82.6691	31.0012	206.837	56.8352	1.86476	0.000325559	0.0121091	PP2A6	5	18191355	18193328	-	1520	protein_coding	PF14299:Phloem protein 2|PF01582:TIR domain	TIR
AT3G13435	179.26	204.99	47.6937	57.8689	192.125	52.7813	1.8635	1.26e-06	0.000173854	-	3	4375300	4376127	+	539	protein_coding	-	-
AT1G08937	46.4747	44.6043	10.5986	14.4672	45.5395	12.5329	1.86052	0.00825567	0.106764	-	1	25262574	25262706	+	133	snoRNA	-	-
AT1G27670	68.2894	41.7573	14.838	15.5006	55.0233	15.1693	1.85878	0.00575931	0.084788	-	1	9627533	9628749	-	1217	protein_coding	-	-
AT2G05180	23.7116	33.216	9.53874	6.20024	28.4638	7.86949	1.85597	0.0370145	0.260813	CYP705A6	2	1875390	1876794	+	1329	protein_coding	PF00067:Cytochrome P450	p450
ATCG00630	166.93	201.194	61.4719	41.3349	184.062	51.4034	1.84106	8.67e-06	0.000808545	PSAJ	Pt	66929	67063	+	135	protein_coding	-	-
AT2G28970	150.806	165.131	63.5916	24.801	157.968	44.1963	1.83899	0.000430301	0.0148997	-	2	12443721	12448365	+	3050	protein_coding	PF13855:Leucine rich repeat|PF00069:Protein kinase domain|PF12819:Carbohydrate-binding protein of the ER	Pkinase
AT3G61280	213.404	104.393	45.574	43.4017	158.899	44.4878	1.83671	0.000233697	0.00964917	-	3	22680960	22683769	+	2079	protein_coding	PF05686:Glycosyl transferase family 90	-
AT2G11810	20.8662	31.3179	7.41902	7.23361	26.0921	7.32632	1.83251	0.0453622	0.288242	MGD3	2	4743162	4746813	+	1926	protein_coding	PF06925:Monogalactosyldiacylglycerol (MGDG) synthase|PF04101:Glycosyltransferase family 28 C-terminal domain	-
AT4G01985	189.693	183.162	41.3346	64.0691	186.428	52.7019	1.8218	8.53e-06	0.000800603	-	4	866151	868253	-	2103	protein_coding	-	-
AT1G07590	7471.05	11056.2	1306.81	3936.12	9263.61	2621.46	1.82116	2.93e-05	0.00204257	-	1	2336477	2339391	-	2407	protein_coding	PF13041:PPR repeat family	-
AT2G04495	75.8771	35.1141	19.0775	12.4005	55.4956	15.739	1.81897	0.0121955	0.134685	-	2	1564056	1565137	+	1082	protein_coding	-	-
AT1G11655	45.5263	57.8907	18.0176	11.3671	51.7085	14.6924	1.81651	0.00761063	0.101178	-	1	3919237	3919869	+	633	protein_coding	-	-
AT3G55515	45.5263	45.5534	9.53874	16.534	45.5398	13.0364	1.80317	0.0118968	0.132364	DVL8	3	20590263	20591401	+	1139	protein_coding	-	-
novel.99	81.5679	82.5655	22.2571	24.801	82.0667	23.529	1.80207	0.000686803	0.0206851	-	2	10434556	10436072	-	448	-	-	-
AT3G04420	132.785	113.883	37.0951	34.1013	123.334	35.5982	1.79291	6.69e-05	0.00387826	anac048	3	1172687	1174508	+	1465	protein_coding	PF02365:No apical meristem (NAM) protein	NAM
AT5G50550	41.7324	37.9611	10.5986	12.4005	39.8468	11.4995	1.79244	0.0150219	0.154186	-	5	20576733	20579103	+	1673	protein_coding	-	-
AT2G26820	93.8979	100.597	30.736	25.8343	97.2475	28.2851	1.78206	0.00031856	0.0119247	ATPP2-A3	2	11437689	11442379	+	2053	protein_coding	PF04548:AIG1 family|PF14299:Phloem protein 2	-
AT3G60540	379.385	333.109	41.3346	166.373	356.247	103.854	1.77758	0.00127275	0.0309421	-	3	22374864	22375916	-	1053	protein_coding	-	-
AT3G13404	33.1962	31.3179	8.47888	10.3337	32.2571	9.40631	1.77735	0.028455	0.227684	-	3	4358179	4359007	-	451	protein_coding	-	-
AT4G36670	3121.39	2187.51	705.867	846.333	2654.45	776.1	1.77403	7.49e-12	5.67e-09	PLT6	4	17287496	17289728	-	1911	protein_coding	PF00083:Sugar (and other) transporter	Sugar_tr
AT3G42180	358.519	424.216	152.62	76.4696	391.367	114.545	1.77333	6.06e-06	0.000615848	-	3	14324181	14328722	-	3945	protein_coding	PF03016:Exostosin family	-
AT3G51340	310.148	241.053	54.0529	107.471	275.6	80.7619	1.76997	2.92e-05	0.00204257	-	3	19056766	19060087	-	2238	protein_coding	PF14541:Xylanase inhibitor C-terminal|PF14543:Xylanase inhibitor N-terminal	-
AT2G05510	9581.38	9729.44	2074.15	3592.01	9655.41	2833.08	1.76892	5.51e-10	2.81e-07	-	2	2015624	2016772	+	812	protein_coding	PF07172:Glycine rich protein family	-
AT5G49770	57.8563	77.8203	23.3169	16.534	67.8383	19.9255	1.76833	0.00326081	0.0582191	-	5	20222669	20227466	+	3231	protein_coding	PF08263:Leucine rich repeat N-terminal domain|PF00069:Protein kinase domain|PF12799:Leucine Rich repeats (2 copies)	Pkinase
AT1G51790	2237.43	1666.49	514.032	632.424	1951.96	573.228	1.76763	3.74e-12	3.19e-09	-	1	19206615	19211971	-	4043	protein_coding	PF07714:Protein tyrosine kinase|PF12819:Carbohydrate-binding protein of the ER	Pkinase_Tyr
AT1G79400	55.9594	25.6238	7.41902	16.534	40.7916	11.9765	1.76644	0.0354665	0.254025	CHX2	1	29864992	29867840	+	2352	protein_coding	PF00999:Sodium/hydrogen exchanger family	Na_H_Exchanger
AT4G06746	612.707	548.538	95.3874	245.943	580.623	170.665	1.76588	3.59e-05	0.00235897	RAP2-9	4	4073717	4074735	-	1019	protein_coding	PF00847:AP2 domain	AP2
AT2G40330	438.19	363.478	93.2677	142.606	400.834	117.937	1.76441	1.86e-07	3.52e-05	PYL6	2	16844588	16846194	-	1607	protein_coding	PF10604:Polyketide cyclase / dehydrase and lipid transport	-
AT2G38870	5444.18	5521.45	968.712	2266.19	5482.81	1617.45	1.76112	1.17e-06	0.000164531	-	2	16236257	16237280	-	732	protein_coding	-	-
AT1G65486	772.998	449.839	129.303	231.476	611.419	180.389	1.76066	8.2e-06	0.000777023	-	1	24349399	24350524	+	1033	protein_coding	-	-
AT1G13500	43.6293	52.1966	18.0176	10.3337	47.9129	14.1757	1.75837	0.0124123	0.136296	-	1	4627789	4629169	-	1161	protein_coding	PF06880:Protein of unknown function (DUF1262)	-
AT5G09978	254.188	260.034	91.148	60.969	257.111	76.0585	1.75793	1.38e-06	0.000183326	PEP7	5	3120655	3121879	+	634	protein_coding	-	-
AT5G59305	47.4232	37.9611	20.1373	5.16687	42.6922	12.6521	1.75699	0.0374882	0.263152	CLE46	5	23923184	23923929	+	606	protein_coding	-	-
AT4G11547	36.0416	55.9927	19.0775	8.26699	46.0171	13.6722	1.7527	0.0220306	0.195084	-	4	6994045	6995237	-	833	protein_coding	-	-
AT4G25631	33.1962	72.1262	9.53874	21.7008	52.6612	15.6198	1.75182	0.0232603	0.202203	U60.2F	4	13075563	13075635	+	73	snoRNA	-	-
AT2G37750	570.975	638.696	201.373	158.106	604.836	179.74	1.75096	1.98e-10	1.12e-07	-	2	15830870	15831592	+	723	protein_coding	-	-
AT1G15040	66.3925	49.3495	18.0176	16.534	57.871	17.2758	1.74432	0.00557836	0.0834506	GAT1_2.1	1	5179887	5181402	-	1516	protein_coding	PF07722:Peptidase C26	-
AT1G59730	200.126	226.818	59.3522	68.2026	213.472	63.7774	1.74262	1.48e-06	0.000192171	TRX7	1	21952597	21953480	-	640	protein_coding	PF00085:Thioredoxin	-
AT3G25820	228.58	296.097	71.0106	85.77	262.338	78.3903	1.74233	9.18e-07	0.000133954	TPS27	3	9439146	9442774	+	3125	protein_coding	PF01397:Terpene synthase, N-terminal domain|PF03936:Terpene synthase family, metal binding domain	-
AT5G53710	130.888	189.806	39.2148	56.8355	160.347	48.0252	1.73863	0.00010629	0.00553685	-	5	21805071	21805812	-	742	protein_coding	-	-
AT3G16530	2036.35	922.456	347.634	539.421	1479.4	443.528	1.7378	1.1e-05	0.000969367	-	3	5624326	5625519	-	1194	protein_coding	PF00139:Legume lectin domain	-
AT1G68450	41.7324	45.5534	13.7782	12.4005	43.6429	13.0893	1.73764	0.0131653	0.14137	VQ8	1	25661487	25662276	-	790	protein_coding	PF05678:VQ motif	-
AT3G09922	169.775	29.4199	37.0951	22.7342	99.5974	29.9147	1.73574	0.0297119	0.232281	IPS1	3	3050989	3051530	+	542	protein_coding	-	-
AT3G46690	335.756	330.262	107.046	94.037	333.009	100.541	1.72802	1.52e-08	4.24e-06	UGT76E4	3	17197443	17199363	-	1842	protein_coding	PF00201:UDP-glucoronosyl and UDP-glucosyl transferase	UDPGT
AT1G52855	125.197	230.614	47.6937	59.9357	177.906	53.8147	1.72467	0.000209055	0.00906348	-	1	19682773	19683565	-	793	protein_coding	-	-
AT4G21400	753.08	687.097	170.638	265.577	720.088	218.107	1.72272	1.08e-08	3.31e-06	CRK28	4	11398857	11402180	-	3049	protein_coding	PF01657:Salt stress response/antifungal|PF07714:Protein tyrosine kinase	Pkinase_Tyr
AT1G27020	9995.86	4923.56	1862.17	2669.2	7459.71	2265.69	1.71914	8.47e-07	0.000126236	-	1	9378404	9380790	+	1529	protein_coding	PF07063:Domain of unknown function (DUF1338)	-
AT2G32680	199.177	40.8082	22.2571	50.6353	119.993	36.4462	1.71841	0.0246425	0.209919	AtRLP23	2	13859769	13862614	-	2846	protein_coding	PF13855:Leucine rich repeat	-
AT5G02502	708.502	841.788	173.817	297.612	775.145	235.714	1.71702	1.25e-07	2.69e-05	OST4B	5	558285	559235	-	521	protein_coding	-	-
AT4G04990	43.6293	87.3106	31.7958	8.26699	65.47	20.0314	1.71035	0.0290679	0.230243	-	4	2554997	2557258	+	1217	protein_coding	PF05553:Cotton fibre expressed protein	-
AT2G42060	306.354	279.963	108.106	71.3028	293.159	89.7043	1.70911	1.43e-06	0.000188097	-	2	17548053	17549121	+	1069	protein_coding	PF03107:C1 domain	-
AT5G56080	173.569	148.997	71.0106	27.9011	161.283	49.4559	1.70661	0.00100484	0.0263063	NAS2	5	22711141	22712441	-	1301	protein_coding	PF03059:Nicotianamine synthase protein	-
AT2G36210	273.158	349.242	109.166	81.6365	311.2	95.4011	1.70623	7.64e-07	0.000116405	-	2	15186040	15186852	-	813	protein_coding	PF02519:Auxin responsive protein	Auxin_inducible
AT1G10682	1270.94	1306.81	452.56	337.913	1288.88	395.237	1.70556	4.83e-12	3.79e-09	-	1	3544913	3545614	-	702	ncRNA	-	-
AT5G43520	73.0317	97.7499	37.0951	15.5006	85.3908	26.2979	1.70067	0.00541049	0.0817981	-	5	17485231	17486309	-	1079	protein_coding	PF03107:C1 domain	-
AT1G07620	459.056	280.912	82.6691	145.706	369.984	114.187	1.69552	3.65e-05	0.0023818	ATOBGM	1	2344390	2346889	-	2219	protein_coding	PF14309:Domain of unknown function (DUF4378)	-
AT1G36622	386.025	419.471	77.3698	172.573	402.748	124.972	1.68758	3.93e-05	0.00252915	-	1	13835620	13836954	-	1051	protein_coding	-	-
AT4G18940	46.4747	57.8907	18.0176	14.4672	52.1827	16.2424	1.68436	0.00973714	0.118471	-	4	10372658	10373895	+	979	protein_coding	PF13563:2'-5' RNA ligase superfamily	-
AT5G48950	38.887	37.9611	9.53874	14.4672	38.4241	12.003	1.67753	0.0253568	0.21365	DHNAT2	5	19845999	19847435	+	889	protein_coding	PF03061:Thioesterase superfamily	4HBT
AT3G12220	84.4133	46.5024	29.6761	11.3671	65.4578	20.5216	1.67502	0.0183554	0.175148	SCPL16	3	3896207	3899019	-	1809	protein_coding	PF00450:Serine carboxypeptidase	Peptidase_S10
AT1G51800	5462.2	4011.54	1100.14	1874.54	4736.87	1487.34	1.67113	4.77e-08	1.13e-05	IOS1	1	19214072	19218053	+	3036	protein_coding	PF12819:Carbohydrate-binding protein of the ER|PF07714:Protein tyrosine kinase|PF13855:Leucine rich repeat	Pkinase_Tyr
AT5G45380	610.811	452.687	154.74	179.807	531.749	167.273	1.66835	2.16e-08	5.66e-06	DUR3	5	18390942	18395928	+	2742	protein_coding	PF00474:Sodium:solute symporter family	-
AT4G15417	161.239	118.629	51.9332	36.1681	139.934	44.0506	1.66823	0.000255118	0.0102147	ATRTL1	4	8821651	8823076	+	988	protein_coding	PF00636:Ribonuclease III domain	Ribonuclease_3
AT4G15396	128.043	118.629	49.8134	27.9011	123.336	38.8573	1.66746	0.000613962	0.0193176	CYP702A6	4	8807483	8810512	+	1779	protein_coding	PF00067:Cytochrome P450	p450
AT4G27652	257.034	233.461	58.2923	96.1037	245.247	77.198	1.66681	1.55e-05	0.00124317	-	4	13809779	13810462	+	684	protein_coding	-	-
AT2G18370	1168.51	1352.37	509.793	286.244	1260.44	398.019	1.66329	1.62e-07	3.3e-05	LTP8	2	7980532	7981868	+	899	protein_coding	PF00234:Protease inhibitor/seed storage/LTP family	-
AT5G44565	85.3617	133.813	37.0951	33.0679	109.587	35.0815	1.64353	0.00101507	0.0264721	-	5	17951442	17953180	+	796	protein_coding	-	-
AT5G59680	106.228	124.323	23.3169	50.6353	115.275	36.9761	1.63911	0.00208251	0.0428678	-	5	24046512	24051112	+	3255	protein_coding	PF00069:Protein kinase domain|PF12819:Carbohydrate-binding protein of the ER|PF13855:Leucine rich repeat	Pkinase
AT2G39200	2537.14	1860.1	614.719	798.798	2198.62	706.758	1.6372	4.55e-10	2.38e-07	MLO12	2	16356041	16359943	-	2091	protein_coding	PF03094:Mlo family	-
AT3G29034	1201.7	1216.65	388.969	389.582	1209.18	389.275	1.63516	2.02e-14	3.44e-11	-	3	11030035	11030906	-	872	protein_coding	-	-
AT2G07715	40.7839	50.2985	16.9578	12.4005	45.5412	14.6791	1.63419	0.0181931	0.174496	-	2	3410597	3413161	+	2170	protein_coding	PF00181:Ribosomal Proteins L2, RNA binding domain	-
AT3G21352	29.4024	64.5339	13.7782	16.534	46.9682	15.1561	1.63138	0.0289803	0.230076	-	3	7519865	7520549	+	582	protein_coding	-	-
AT1G06830	213.404	173.672	41.3346	83.7032	193.538	62.5189	1.62927	0.000340419	0.0125746	GRXS11	1	2097106	2097655	+	550	protein_coding	PF00462:Glutaredoxin	-
AT4G12090	211.507	274.269	83.729	73.3695	242.888	78.5492	1.62886	4.94e-06	0.000527476	-	4	7241906	7243228	-	971	protein_coding	PF03311:Cornichon protein	-
novel.202	252.291	239.155	37.0951	121.938	245.723	79.5166	1.62679	0.00214526	0.0436751	-	4	12152485	12153482	-	907	-	PF01657:Salt stress response/antifungal	-
AT2G43590	2094.21	3872.04	1281.37	651.025	2983.12	966.198	1.62652	2.44e-05	0.00181075	-	2	18081304	18082776	-	1110	protein_coding	PF00182:Chitinase class I|PF00187:Chitin recognition protein	-
AT3G47790	177.363	386.255	124.004	58.9023	281.809	91.453	1.62419	0.00140607	0.0329264	ABCA8	3	17629530	17633942	+	3173	protein_coding	PF12698:ABC-2 family transporter protein|PF00005:ABC transporter	ABC_tran
AT3G04530	72.0832	111.985	34.9754	24.801	92.0343	29.8882	1.62329	0.00280413	0.0526404	PPCK2	3	1221422	1222744	+	1249	protein_coding	PF00069:Protein kinase domain	Pkinase
AT5G66985	223.837	265.728	120.824	38.2348	244.783	79.5295	1.62285	0.00200512	0.0417801	-	5	26743279	26744019	+	741	protein_coding	-	-
AT4G14060	452.417	540.946	172.757	149.839	496.682	161.298	1.6228	8.49e-09	2.71e-06	-	4	8107254	8108379	+	828	protein_coding	PF00407:Pathogenesis-related protein Bet v I family	-
AT1G65690	940.876	881.647	327.497	265.577	911.262	296.537	1.61988	3.83e-11	2.37e-08	NHL6	1	24431417	24433165	-	1251	protein_coding	PF03168:Late embryogenesis abundant protein	-
AT1G09080	230.477	60.7378	28.6162	66.1359	145.607	47.3761	1.61918	0.0190739	0.179488	MED37B	1	2929217	2931850	-	2125	protein_coding	PF00012:Hsp70 protein	HSP70
AT1G51620	483.716	356.835	81.6093	192.207	420.276	136.908	1.61752	0.000193423	0.00864265	-	1	19140130	19141926	+	1483	protein_coding	PF00069:Protein kinase domain	Pkinase
AT5G48430	854.566	748.783	365.652	157.073	801.675	261.362	1.61735	3.75e-05	0.00242566	-	5	19627634	19629167	-	1534	protein_coding	PF14541:Xylanase inhibitor C-terminal|PF14543:Xylanase inhibitor N-terminal	-
AT1G69920	60.7017	44.6043	9.53874	24.801	52.653	17.1699	1.61485	0.0262033	0.218307	GSTU12	1	26334250	26335630	-	1003	protein_coding	PF13417:Glutathione S-transferase, N-terminal domain	-
AT4G18510	147.012	113.883	67.8311	17.5673	130.448	42.6992	1.6125	0.0108537	0.126248	CLE2	4	10211577	10212452	+	876	protein_coding	-	-
AT2G29995	721.781	809.521	261.786	241.809	765.651	251.797	1.60452	4.19e-11	2.52e-08	PSY3	2	12796503	12799441	-	948	protein_coding	-	-
novel.36	1099.27	1332.44	296.761	504.286	1215.85	400.524	1.60175	2.58e-07	4.46e-05	-	1	1477422	1478262	-	820	-	-	-
AT4G32870	421.118	379.611	150.5	113.671	400.365	132.086	1.60026	1.65e-07	3.33e-05	-	4	15862117	15862814	+	698	protein_coding	PF10604:Polyketide cyclase / dehydrase and lipid transport	-
AT5G06570	658.234	668.116	251.187	187.041	663.175	219.114	1.59805	4.32e-09	1.52e-06	-	5	2007419	2011179	-	1812	protein_coding	PF07859:alpha/beta hydrolase fold	Abhydrolase_3
AT5G44585	85.3617	78.7694	18.0176	36.1681	82.0655	27.0928	1.5975	0.00550288	0.0826849	-	5	17984527	17986431	+	1457	protein_coding	-	-
AT5G38900	167.878	184.112	29.6761	86.8034	175.995	58.2397	1.59434	0.00286533	0.0532394	-	5	15573505	15575712	-	1277	protein_coding	PF01323:DSBA-like thioredoxin domain	DSBA
AT1G35515	193.487	205.939	54.0529	78.5364	199.713	66.2946	1.59027	3.7e-05	0.00240319	MYB8	1	13077890	13080265	+	675	protein_coding	PF00249:Myb-like DNA-binding domain	Myb_DNA-binding
AT5G44910	1610.49	1331.49	378.37	599.357	1470.99	488.863	1.58907	4.52e-08	1.09e-05	-	5	18137349	18138757	+	1253	protein_coding	PF01582:TIR domain	TIR
AT1G68880	538.727	618.767	232.109	152.939	578.747	192.524	1.58832	2.76e-07	4.73e-05	BZIP8	1	25893971	25895056	-	1086	protein_coding	PF00170:bZIP transcription factor	bZIP_1
AT1G43160	1039.52	983.193	369.891	305.879	1011.35	337.885	1.58188	2.5e-11	1.7e-08	RAP2-6	1	16263805	16264945	+	1045	protein_coding	PF00847:AP2 domain	AP2
novel.83	91.0525	136.66	36.0353	40.3016	113.856	38.1684	1.57653	0.00110481	0.0280252	-	2	1391709	1393756	-	2048	-	PF14223:gag-polypeptide of LTR copia-type	-
AT5G07105	36.0416	32.267	8.47888	14.4672	34.1543	11.4731	1.57251	0.0469913	0.294616	-	5	19624720	19624869	+	150	snoRNA	-	-
AT5G61590	1213.08	696.587	266.025	376.148	954.836	321.086	1.57212	4.76e-06	0.000514101	ERF107	5	24764256	24765511	-	1256	protein_coding	PF00847:AP2 domain	AP2
ATCG01020	486.562	464.075	158.979	161.206	475.318	160.093	1.56996	3.75e-09	1.34e-06	RPL32	Pt	113449	113607	+	159	protein_coding	-	-
AT3G20380	188.744	202.143	114.465	17.5673	195.444	66.0161	1.56676	0.0234153	0.203118	-	3	7108097	7109970	+	1414	protein_coding	PF00917:MATH domain	MATH
AT2G05520	28787.8	29563.2	7209.17	12520.4	29175.5	9864.76	1.56439	3.54e-08	8.82e-06	GRP3	2	2025991	2027283	+	1065	protein_coding	PF07172:Glycine rich protein family	-
AT4G01700	1705.34	1187.23	430.303	551.821	1446.29	491.062	1.55825	2.34e-08	6.05e-06	-	4	732313	733510	-	966	protein_coding	PF00182:Chitinase class I	-
AT3G12720	70.1863	43.6553	23.3169	15.5006	56.9208	19.4088	1.55314	0.0178544	0.171813	ATY53	3	4043288	4044715	-	1236	protein_coding	PF00249:Myb-like DNA-binding domain	Myb_DNA-binding
AT5G07322	469.489	546.64	183.356	163.273	508.065	173.314	1.55179	1.42e-08	4.1e-06	-	5	2313119	2313563	-	445	ncRNA	-	-
AT1G01380	42.6809	61.6869	21.1972	14.4672	52.1839	17.8322	1.54998	0.0195597	0.182213	ETC1	1	147043	148014	+	854	protein_coding	-	-
AT1G21360	106.228	87.3106	48.7536	17.5673	96.7693	33.1605	1.54654	0.0105496	0.123885	GLTP2	1	7481184	7483513	+	1452	protein_coding	PF08718:Glycolipid transfer protein (GLTP)	-
AT1G45145	2089.47	2434.26	943.276	609.69	2261.86	776.483	1.54263	1.83e-08	4.92e-06	TRX5	1	17074942	17076417	-	840	protein_coding	PF00085:Thioredoxin	-
AT1G28370	151.754	134.762	48.7536	49.6019	143.258	49.1778	1.5425	0.000160711	0.00745936	ERF11	1	9955774	9956980	-	1207	protein_coding	PF00847:AP2 domain	AP2
AT5G24090	334.808	345.446	118.704	115.738	340.127	117.221	1.53689	1.75e-07	3.46e-05	CHIB1	5	8143545	8145252	-	1268	protein_coding	PF00704:Glycosyl hydrolases family 18	-
AT1G19380	1525.13	1138.83	452.56	466.051	1331.98	459.306	1.53603	6.12e-10	3.05e-07	-	1	6697874	6698858	+	895	protein_coding	PF06708:Protein of unknown function (DUF1195)	-
AT3G11120	2022.12	2186.56	640.156	813.265	2104.34	726.71	1.53379	1.22e-11	8.91e-09	RPL41G	3	3481020	3481485	+	367	protein_coding	-	-
AT1G15380	278.848	346.395	136.722	79.5697	312.622	108.146	1.53209	5.12e-05	0.0030645	-	1	5290582	5292582	+	1193	protein_coding	PF00903:Glyoxalase/Bleomycin resistance protein/Dioxygenase superfamily	Glyoxalase
AT1G52800	49.3201	29.4199	15.8979	11.3671	39.37	13.6325	1.53082	0.0433935	0.282065	-	1	19664023	19665631	+	1235	protein_coding	PF03171:2OG-Fe(II) oxygenase superfamily|PF14226:non-haem dioxygenase in morphine synthesis N-terminal	2OG-FeII_Oxy
AT4G21620	4829.58	5559.41	1447.77	2148.38	5194.49	1798.08	1.53046	2.01e-09	7.76e-07	-	4	11491264	11492216	+	953	protein_coding	-	-
AT2G46390	1448.3	1392.22	218.331	765.73	1420.26	492.03	1.52914	0.00117598	0.0293923	SDH8	2	19042301	19043234	-	522	protein_coding	-	-
AT5G07285	89.1556	85.4126	20.1373	40.3016	87.2841	30.2195	1.52894	0.006268	0.0891812	-	5	19789614	19790115	+	502	lncRNA	-	-
AT1G63245	135.63	150.896	58.2923	41.3349	143.263	49.8136	1.52474	0.000359046	0.013069	CLE14	1	23460198	23460884	-	687	protein_coding	-	-
AT1G02920	9471.36	6075.68	1974.52	3429.77	7773.52	2702.14	1.52443	3.16e-06	0.000369171	GSTF7	1	658578	659980	-	1213	protein_coding	PF00043:Glutathione S-transferase, C-terminal domain|PF02798:Glutathione S-transferase, N-terminal domain	GST_N
AT4G22610	1727.15	2400.09	661.353	773.997	2063.62	717.675	1.52371	1.94e-09	7.76e-07	-	4	11901703	11902642	-	940	protein_coding	PF14547:Hydrophobic seed protein	-
AT4G36570	53.114	49.3495	22.2571	13.4339	51.2317	17.8455	1.52264	0.0208462	0.188859	ATRL3	4	17254290	17255762	+	816	protein_coding	-	-
AT1G02360	1111.6	1063.86	438.782	319.312	1087.73	379.047	1.52111	3.04e-09	1.11e-06	-	1	471883	473336	-	1294	protein_coding	PF00182:Chitinase class I	-
AT4G27654	36.0416	38.9102	10.5986	15.5006	37.4759	13.0496	1.52101	0.0406898	0.273498	-	4	13811612	13812126	+	515	protein_coding	-	-
AT3G48080	234.271	138.558	76.31	53.7354	186.414	65.0227	1.52001	0.000656679	0.020136	EDS1B	3	17752463	17755190	-	2576	protein_coding	PF01764:Lipase (class 3)	Lipase_3
AT4G27740	513.119	408.082	163.219	158.106	460.601	160.662	1.51953	1.19e-07	2.59e-05	-	4	13839038	13839842	+	654	protein_coding	PF03226:Yippee zinc-binding/DNA-binding /Mis18, centromere assembly	-
AT1G07610	3704.7	5163.66	1886.55	1208.01	4434.18	1547.28	1.519	1.86e-07	3.52e-05	MT1C	1	2341447	2342148	+	577	protein_coding	-	-
AT1G07902	35.0932	39.8592	12.7183	13.4339	37.4762	13.0761	1.5189	0.037932	0.26438	-	1	2443918	2445140	+	479	protein_coding	-	-
AT4G04460	223.837	327.415	136.722	55.8022	275.626	96.2621	1.51841	0.00144012	0.0334553	APA3	4	2224422	2227874	+	1841	protein_coding	PF05184:Saposin-like type B, region 1|PF03489:Saposin-like type B, region 2|PF00026:Eukaryotic aspartyl protease	Asp
AT5G44610	533.985	596.939	243.768	152.939	565.462	198.354	1.51179	1.86e-06	0.000234411	PCAP2	5	17993535	17994722	-	1094	protein_coding	PF05558:DREPP plasma membrane polypeptide	-
AT2G41230	181.157	126.221	61.4719	46.5018	153.689	53.9869	1.50984	0.000533282	0.0173584	ORS1	2	17194748	17195697	-	950	protein_coding	-	-
AT4G12470	16350.6	10852.1	3007.88	6561.92	13601.4	4784.9	1.50716	4.2e-05	0.00264762	AZI1	4	7401087	7401951	-	865	protein_coding	PF14547:Hydrophobic seed protein	-
ATMG01370	41.7324	29.4199	11.6585	13.4339	35.5761	12.5462	1.50332	0.0488286	0.301441	ORF111D	Mt	360717	361052	-	336	protein_coding	-	-
AT1G18970	128.991	231.563	95.3874	32.0346	180.277	63.711	1.5015	0.00913762	0.113567	GLP1	1	6554496	6555610	-	1115	protein_coding	PF00190:Cupin	-
AT4G13235	284.539	312.23	101.747	109.538	298.385	105.642	1.49785	1.37e-06	0.000183326	EDA21	4	7677643	7678529	-	781	protein_coding	-	-
AT3G50280	89.1556	74.0242	40.2747	17.5673	81.5899	28.921	1.49768	0.0122998	0.135397	-	3	18637735	18639475	+	1741	protein_coding	PF02458:Transferase family	-
AT2G47130	388.87	278.065	105.986	130.205	333.468	118.096	1.49731	1.03e-05	0.000929987	SDR3A	2	19349348	19350650	-	1222	protein_coding	PF13561:Enoyl-(Acyl carrier protein) reductase	-
AT3G50610	84.4133	108.189	45.574	22.7342	96.3013	34.1541	1.49669	0.00652628	0.0915922	CEP9	3	18779551	18780514	-	964	protein_coding	-	-
AT2G28570	1021.5	964.213	291.462	412.316	992.854	351.889	1.4962	1.83e-08	4.92e-06	-	2	12241766	12242778	+	1013	protein_coding	-	-
AT5G55090	122.352	146.15	46.6339	48.5685	134.251	47.6012	1.49577	0.000389559	0.0139558	MAPKKK15	5	22356852	22358413	-	1562	protein_coding	PF00069:Protein kinase domain	Pkinase
AT5G09290	88.2071	82.5655	26.4965	34.1013	85.3863	30.2989	1.49416	0.00345168	0.0600881	SAL4	5	2882302	2884229	+	1301	protein_coding	PF00459:Inositol monophosphatase family	-
AT1G49030	50.2686	50.2985	24.3768	11.3671	50.2835	17.8719	1.49395	0.0308339	0.236557	PCR6	1	18136666	18138080	+	1037	protein_coding	PF04749:PLAC8 family	-
novel.217	128.043	162.284	28.6162	74.4029	145.163	51.5096	1.49363	0.00539708	0.0817547	-	5	16976046	16976821	+	625	-	PF00297:Ribosomal protein L3	-
AT2G39210	2970.59	2026.18	627.437	1151.18	2498.38	889.308	1.49012	1.01e-05	0.00091627	-	2	16366102	16368570	-	2330	protein_coding	PF06813:Nodulin-like|PF07690:Major Facilitator Superfamily	MFS_1
AT1G06553	68.2894	90.1577	30.736	25.8343	79.2235	28.2851	1.48627	0.00554983	0.0832361	-	1	11685235	11685376	+	142	snoRNA	-	-
AT2G30750	298.766	204.99	45.574	134.339	251.878	89.9563	1.48465	0.00437522	0.0705556	CYP71A12	2	13099486	13101371	-	1494	protein_coding	PF00067:Cytochrome P450	p450
AT1G21320	183.053	164.182	46.6339	77.503	173.618	62.0684	1.48315	0.000445135	0.0152274	NSRB	1	7462327	7466164	-	2718	protein_coding	PF00076:RNA recognition motif. (a.k.a. RRM, RBD, or RNP domain)	RRM_1
AT4G33020	40.7839	35.1141	11.6585	15.5006	37.949	13.5795	1.48193	0.0429619	0.281245	ZIP9	4	15932420	15934762	-	1503	protein_coding	PF02535:ZIP Zinc transporter	-
AT1G76430	37.9385	37.9611	15.8979	11.3671	37.9498	13.6325	1.47786	0.043361	0.282065	PHT1-9	1	28678935	28682062	-	1967	protein_coding	PF00083:Sugar (and other) transporter	Sugar_tr
AT1G20700	39.8355	41.7573	14.838	14.4672	40.7964	14.6526	1.47734	0.0343105	0.249682	WOX14	1	7182558	7184056	+	1499	protein_coding	PF00046:Homeobox domain	Homeobox
AT5G10760	749.286	170.825	139.902	191.174	460.056	165.538	1.47454	0.0102747	0.122338	AED1	5	3400322	3402389	-	1968	protein_coding	PF14543:Xylanase inhibitor N-terminal|PF14541:Xylanase inhibitor C-terminal	-
AT1G19530	124.249	94.9028	58.2923	20.6675	109.576	39.4799	1.47404	0.0127707	0.138785	-	1	6763765	6765049	+	928	protein_coding	-	-
AT3G13950	132.785	98.699	25.4367	57.8689	115.742	41.6528	1.47325	0.00692739	0.0952574	-	3	4603885	4605513	+	1206	protein_coding	PF13962:Domain of unknown function	-
AT4G25310	336.705	544.742	206.673	111.604	440.723	159.139	1.47003	0.000276406	0.0108334	-	4	12949664	12951937	+	1950	protein_coding	PF03171:2OG-Fe(II) oxygenase superfamily|PF14226:non-haem dioxygenase in morphine synthesis N-terminal	2OG-FeII_Oxy
AT2G05380	15571.9	16106.9	3531.45	7904.27	15839.4	5717.86	1.46995	2.42e-05	0.00181075	GRP3S	2	1966610	1968142	+	914	protein_coding	PF07172:Glycine rich protein family	-
novel.169	107.176	165.131	52.993	45.4684	136.154	49.2307	1.46788	0.00125302	0.0305695	-	4	761469	762615	+	637	-	-	-
AT1G43765	60.7017	60.7378	23.3169	20.6675	60.7197	21.9922	1.46546	0.0119349	0.132428	-	1	16537511	16538091	+	406	ncRNA	PF00628:PHD-finger	PHD
AT4G18205	753.08	574.162	179.116	301.745	663.621	240.431	1.46438	1.32e-05	0.00111671	PUP22	4	10073711	10075370	+	1578	protein_coding	PF16913:Purine nucleobase transmembrane transport	-
ATCG00530	106.228	66.432	28.6162	34.1013	86.33	31.3588	1.46065	0.0069413	0.0953193	CEMA	Pt	60741	61430	+	690	protein_coding	PF03040:CemA family	-
AT5G03350	252.291	73.0752	58.2923	59.9357	162.683	59.114	1.46048	0.014747	0.152705	LLP	5	815610	816670	-	1061	protein_coding	PF00139:Legume lectin domain	-
AT1G05700	369.901	468.82	184.416	120.905	419.36	152.66	1.45832	1.46e-05	0.00118889	-	1	1709673	1713474	+	3004	protein_coding	PF00069:Protein kinase domain|PF12819:Carbohydrate-binding protein of the ER|PF13855:Leucine rich repeat	Pkinase
AT2G46750	294.024	310.332	129.303	90.9369	302.178	110.12	1.45685	1.35e-05	0.00113134	GULLO2	2	19207991	19211021	-	2340	protein_coding	PF04030:D-arabinono-1,4-lactone oxidase|PF01565:FAD binding domain	FAD_binding_4
AT3G55910	42.6809	46.5024	19.0775	13.4339	44.5916	16.2557	1.45666	0.0324795	0.243025	-	3	20742676	20743479	+	711	protein_coding	-	-
ATCG00340	55.9594	225.869	60.412	42.3683	140.914	51.3902	1.45554	0.0274354	0.224271	PSAB	Pt	37375	39579	-	2205	protein_coding	PF00223:Photosystem I psaA/psaB protein	-
AT4G13420	542.521	1041.08	409.106	168.44	791.803	288.773	1.45547	0.00141474	0.0330159	POT5	4	7796782	7802251	-	2691	protein_coding	PF02705:K+ potassium transporter	K_trans
AT1G65845	2532.4	2226.42	898.762	838.066	2379.41	868.414	1.45419	1.33e-12	1.23e-09	-	1	24493011	24493923	-	777	protein_coding	-	-
AT1G24147	266.518	118.629	46.6339	94.037	192.573	70.3354	1.45246	0.00699925	0.095794	-	1	8542212	8543545	+	933	protein_coding	-	-
AT5G55170	205.817	178.417	93.2677	47.5352	192.117	70.4014	1.4492	0.00104442	0.0269137	SUMO3	5	22385257	22386223	-	790	protein_coding	PF11976:Ubiquitin-2 like Rad60 SUMO-like	-
AT3G25880	87.2587	46.5024	16.9578	32.0346	66.8805	24.4962	1.44796	0.0274784	0.224353	-	3	9469105	9470033	-	818	protein_coding	-	-
AT2G23985	70.1863	60.7378	21.1972	26.8677	65.4621	24.0325	1.44513	0.0113781	0.128875	-	2	10204802	10206522	+	1721	protein_coding	-	-
AT5G54145	583.305	807.623	263.905	246.976	695.464	255.441	1.44505	2.47e-07	4.32e-05	-	5	21972444	21973441	+	998	protein_coding	-	-
AT1G51860	710.399	478.31	281.923	155.006	594.355	218.464	1.4443	0.000106879	0.00553924	-	1	19257403	19261794	-	3219	protein_coding	PF07714:Protein tyrosine kinase|PF12799:Leucine Rich repeats (2 copies)|PF12819:Carbohydrate-binding protein of the ER	Pkinase_Tyr
AT1G51270	538.727	597.888	217.271	200.474	568.308	208.873	1.44416	1.94e-08	5.16e-06	-	1	19007364	19011285	+	3205	protein_coding	PF01582:TIR domain|PF00635:MSP (Major sperm protein) domain	Motile_Sperm
AT4G39361	79.6709	70.2281	11.6585	43.4017	74.9495	27.5301	1.44329	0.0386052	0.266277	-	4	18304891	18305010	+	120	snoRNA	-	-
AT5G40730	1540.3	1348.57	668.772	394.749	1444.44	531.76	1.44187	1.71e-06	0.000220332	AGP24	5	16301072	16301748	+	677	protein_coding	-	-
AT4G28840	71.1348	51.2475	25.4367	19.6341	61.1912	22.5354	1.44171	0.0167798	0.166009	SPEAR3	4	14240666	14242679	+	1261	protein_coding	-	-
AT5G20820	139.424	133.813	71.0106	29.9678	136.619	50.4892	1.43725	0.0053775	0.081642	SAUR76	5	7046747	7047446	-	700	protein_coding	PF02519:Auxin responsive protein	Auxin_inducible
AT3G23200	165.981	139.507	49.8134	63.0358	152.744	56.4246	1.43626	0.000428599	0.0148939	-	3	8281338	8282786	+	1357	protein_coding	PF04535:Domain of unknown function (DUF588)	-
AT1G13300	560.542	612.123	266.025	168.44	586.333	217.232	1.43289	4.2e-06	0.00046075	HRS1	1	4556878	4558793	+	1336	protein_coding	PF00249:Myb-like DNA-binding domain	Myb_DNA-binding
AT4G13860	690.482	766.815	338.095	202.541	728.648	270.318	1.43092	5.67e-06	0.000584832	-	4	8022497	8023603	+	861	protein_coding	-	-
AT3G57450	2380.64	2901.18	524.631	1434.32	2640.91	979.477	1.43084	0.000484118	0.0161531	-	3	21261046	21262763	+	1718	protein_coding	-	-
AT1G15125	1270.94	483.055	245.888	405.082	876.998	325.485	1.42984	0.0015434	0.0350569	-	1	5204312	5205964	+	1495	protein_coding	PF03492:SAM dependent carboxyl methyltransferase	-
ATMG00030	135.63	173.672	43.4543	71.3028	154.651	57.3785	1.42963	0.00128637	0.0310732	ORF107A	Mt	11918	12241	+	324	protein_coding	-	-
AT4G35180	327.22	244.849	59.3522	152.939	286.035	106.146	1.42943	0.00260813	0.0501015	LHT7	4	16737835	16740601	-	2424	protein_coding	PF01490:Transmembrane amino acid transporter protein	Aa_trans
AT3G18560	413.53	502.036	211.972	128.138	457.783	170.055	1.42914	2.88e-05	0.00202981	-	3	6393747	6394842	+	1096	protein_coding	-	-
AT4G23230	253.24	187.908	63.5916	100.237	220.574	81.9144	1.42844	0.000380951	0.0137439	CRK15	4	12157827	12160279	-	1884	protein_coding	PF07714:Protein tyrosine kinase|PF01657:Salt stress response/antifungal	Pkinase_Tyr
AT2G27660	883.968	756.376	277.683	331.713	820.172	304.698	1.42837	1.36e-08	3.97e-06	-	2	11798417	11800928	-	2512	protein_coding	PF03107:C1 domain	-
AT3G51910	88.2071	92.0558	38.155	28.9345	90.1314	33.5447	1.42655	0.00410562	0.0674472	HSFA7A	3	19265141	19266806	+	1159	protein_coding	PF00447:HSF-type DNA-binding	HSF_DNA-bind
AT4G10265	55.0109	69.2791	32.8557	13.4339	62.145	23.1448	1.42648	0.0316913	0.240115	-	4	6373008	6373667	-	660	protein_coding	-	-
AT5G07010	983.557	2344.1	589.282	651.025	1663.83	620.154	1.42378	0.000203494	0.00892193	SOT15	5	2174668	2176446	-	1779	protein_coding	PF00685:Sulfotransferase domain	Sulfotransfer_1
AT5G48657	936.134	617.818	286.162	293.478	776.976	289.82	1.42269	1.27e-06	0.000173854	-	5	19733882	19735726	-	1736	protein_coding	-	-
AT3G54040	1419.85	1750.01	830.931	357.547	1584.93	594.239	1.41549	0.00019294	0.00863997	-	3	20013726	20015653	-	1212	protein_coding	PF06521:PAR1 protein	-
AT3G57157	123.3	186.01	54.0529	62.0024	154.655	58.0276	1.414	0.00100805	0.0263565	-	3	21157011	21157247	+	237	ncRNA	-	-
AT1G18290	73.0317	55.0437	23.3169	24.801	64.0377	24.0589	1.41221	0.0145465	0.151242	-	1	6297219	6298328	+	1110	protein_coding	PF14009:Domain of unknown function (DUF4228)	-
AT2G35658	63.5471	70.2281	30.736	19.6341	66.8876	25.185	1.41013	0.0148577	0.153617	-	2	14990325	14990935	-	611	protein_coding	-	-
AT1G55940	56.9078	79.7184	32.8557	18.6007	68.3131	25.7282	1.4099	0.0196211	0.182362	CYP708A1	1	20922342	20924587	-	1722	protein_coding	PF00067:Cytochrome P450	p450
AT5G65925	420.169	427.063	104.926	213.908	423.616	159.417	1.40939	0.000240686	0.00973227	-	5	26369045	26369854	+	810	protein_coding	-	-
AT1G70880	92.9494	172.723	78.4297	21.7008	132.836	50.0653	1.4088	0.0297106	0.232281	-	1	26722846	26723978	-	981	protein_coding	PF00407:Pathogenesis-related protein Bet v I family	-
AT3G47380	413.53	415.674	90.0881	222.175	414.602	156.132	1.40839	0.00103987	0.0268448	PMEI11	3	17457614	17458599	+	986	protein_coding	PF04043:Plant invertase/pectin methylesterase inhibitor	-
AT3G58550	874.483	1277.39	530.99	280.044	1075.94	405.517	1.40799	8.66e-05	0.00478825	-	3	21649364	21650347	-	790	protein_coding	PF14368:Probable lipid transfer	-
AT3G47965	342.395	454.585	153.68	146.739	398.49	150.209	1.40763	3.88e-06	0.000430307	-	3	17707918	17708918	-	522	protein_coding	-	-
AT1G69520	971.227	731.701	262.845	379.248	851.464	321.047	1.40692	2.31e-06	0.000280182	-	1	26128288	26129602	+	1016	protein_coding	PF08241:Methyltransferase domain	Methyltransf_11
AT3G52748	375.592	442.247	204.553	104.371	408.919	154.462	1.40512	0.000235491	0.00964917	-	3	19548972	19549589	+	436	ncRNA	-	-
AT4G30450	377.489	387.204	109.166	179.807	382.346	144.486	1.4034	4.23e-05	0.00264762	-	4	14886027	14886784	-	758	protein_coding	-	-
AT5G44574	276.951	404.286	98.567	159.139	340.619	128.853	1.40194	0.00021856	0.00933681	-	5	17970210	17971456	+	1022	protein_coding	-	-
AT5G22270	553.903	523.864	155.799	252.143	538.883	203.971	1.40117	1.14e-05	0.000995101	-	5	7372109	7373259	-	927	protein_coding	-	-
AT3G08520	2900.4	3912.84	1152.07	1432.26	3406.62	1292.16	1.3985	1.57e-08	4.32e-06	RPL41G	3	2586001	2586343	+	246	protein_coding	-	-
AT1G27695	68.2894	72.1262	21.1972	32.0346	70.2078	26.6159	1.39845	0.0128545	0.139305	TGD5	1	9639024	9640204	+	644	protein_coding	-	-
AT1G13520	48.3716	70.2281	24.3768	20.6675	59.2999	22.5221	1.39704	0.0215848	0.19264	-	1	4631633	4633299	-	1464	protein_coding	PF06880:Protein of unknown function (DUF1262)	-
AT2G39410	218.147	248.645	130.363	47.5352	233.396	88.949	1.39255	0.00484145	0.0750095	-	2	16455569	16458363	+	1416	protein_coding	PF12146:Serine aminopeptidase, S33	-
AT1G64170	1599.11	1149.27	433.483	614.857	1374.19	524.17	1.39032	1.46e-06	0.000191531	CHX16	1	23814984	23818481	-	2879	protein_coding	PF00999:Sodium/hydrogen exchanger family	Na_H_Exchanger
AT5G64120	9488.43	7403.37	2481.13	3969.19	8445.9	3225.16	1.38884	7.95e-07	0.0001194	PER71	5	25659257	25661007	-	1342	protein_coding	PF00141:Peroxidase	-
AT1G15670	2534.29	2239.71	802.314	1020.97	2387	911.644	1.38856	1.11e-09	4.91e-07	-	1	5389952	5391672	+	1721	protein_coding	PF13964:Kelch motif	-
AT1G31885	113.816	152.794	66.7712	35.1347	133.305	50.953	1.38843	0.00472484	0.0742163	NIP3-1	1	11450315	11452068	+	1439	protein_coding	PF00230:Major intrinsic protein	-
AT5G12340	174.517	221.124	99.6269	51.6687	197.82	75.6478	1.38764	0.00165558	0.0369878	-	5	3992623	3993767	-	1145	protein_coding	PF14009:Domain of unknown function (DUF4228)	-
AT4G05590	606.068	741.191	245.888	269.71	673.63	257.799	1.3856	8.86e-08	2.01e-05	-	4	2907012	2908631	+	953	protein_coding	PF03650:Uncharacterised protein family (UPF0041)	-
AT3G01260	120.455	96.8009	63.5916	19.6341	108.628	41.6129	1.38557	0.0243833	0.208679	-	3	80003	82182	-	1699	protein_coding	PF01263:Aldose 1-epimerase	Aldose_epim
AT4G15236	78.7225	36.0631	21.1972	22.7342	57.3928	21.9657	1.3855	0.0400953	0.271819	ABCG43	4	8696677	8702727	+	4173	protein_coding	PF00005:ABC transporter|PF14510:ABC-transporter extracellular N-terminal|PF08370:Plant PDR ABC transporter associated|PF01061:ABC-2 type transporter	ABC2_membrane
AT5G24105	68.2894	49.3495	26.4965	18.6007	58.8194	22.5486	1.38401	0.0244023	0.208754	AGP41	5	8151907	8153007	+	733	protein_coding	-	-
AT2G14900	561.49	799.082	337.036	184.974	680.286	261.005	1.3824	0.000129639	0.00636555	GASA7	2	6404131	6405352	+	715	protein_coding	PF02704:Gibberellin regulated protein	-
AT3G52450	881.123	823.757	390.029	264.544	852.44	327.286	1.38134	7.84e-07	0.000118525	PUB22	3	19440617	19442427	-	1811	protein_coding	PF04564:U-box domain	U-box
AT3G13910	1138.16	1133.14	356.113	515.653	1135.65	435.883	1.38127	1.89e-07	3.53e-05	-	3	4590684	4591541	-	673	protein_coding	PF12023:Domain of unknown function (DUF3511)	-
AT2G29460	711.348	502.985	94.3276	373.048	607.166	233.688	1.37716	0.00966952	0.118022	GSTU4	2	12626478	12627891	-	1177	protein_coding	PF13410:Glutathione S-transferase, C-terminal domain|PF02798:Glutathione S-transferase, N-terminal domain	GST_N
AT2G21045	1650.33	2058.44	1013.23	415.416	1854.38	714.321	1.37645	0.000405485	0.0143501	HAC1	2	9027730	9029058	+	891	protein_coding	PF00581:Rhodanese-like domain	Rhodanese
AT3G50470	146.063	75.9223	42.3944	43.4017	110.993	42.898	1.37145	0.0084101	0.107985	HR3	3	18728935	18730497	+	1188	protein_coding	PF05659:Arabidopsis broad-spectrum mildew resistance protein RPW8	-
AT2G36690	1932.02	1347.62	677.251	592.123	1639.82	634.687	1.36948	1.81e-07	3.52e-05	-	2	15379660	15382131	+	1466	protein_coding	PF03171:2OG-Fe(II) oxygenase superfamily|PF14226:non-haem dioxygenase in morphine synthesis N-terminal	2OG-FeII_Oxy
AT5G50335	358.519	469.769	166.398	155.006	414.144	160.702	1.36583	5.11e-06	0.000537776	-	5	20489033	20489727	-	695	protein_coding	-	-
AT3G50740	4929.17	3396.57	1631.13	1600.7	4162.87	1615.91	1.36524	2.97e-08	7.59e-06	UGT72E1	3	18855043	18857040	-	1998	protein_coding	PF00201:UDP-glucoronosyl and UDP-glucosyl transferase	UDPGT
AT5G25440	872.587	855.075	294.641	376.148	863.831	335.395	1.36466	4.16e-08	1.01e-05	-	5	8854507	8856809	-	1554	protein_coding	PF07714:Protein tyrosine kinase	Pkinase_Tyr
AT3G13677	267.467	249.594	60.412	140.539	258.531	100.475	1.36273	0.00229571	0.0458243	-	3	4475887	4477092	+	1012	protein_coding	-	-
AT1G30990	63.5471	52.1966	24.3768	20.6675	57.8718	22.5221	1.3619	0.0222804	0.19653	-	1	11051999	11053295	+	822	protein_coding	PF00407:Pathogenesis-related protein Bet v I family	-
AT4G21680	1044.26	663.371	206.673	457.784	853.815	332.229	1.36148	0.000823962	0.0232073	NPF7.2	4	11517353	11519805	-	2186	protein_coding	PF00854:POT family	-
AT4G22212	1333.54	1927.48	618.958	651.025	1630.51	634.992	1.36049	1.68e-07	3.37e-05	-	4	11753842	11754752	+	790	protein_coding	-	-
AT5G22890	332.911	396.694	170.638	113.671	364.802	142.154	1.36013	4.89e-05	0.00295446	STOP2	5	7653257	7654835	-	1579	protein_coding	-	-
AT3G50900	993.99	954.723	378.37	381.315	974.356	379.842	1.35904	6.84e-10	3.32e-07	-	3	18917782	18918811	+	1030	protein_coding	-	-
AT3G57460	225.734	173.672	71.0106	84.7366	199.703	77.8736	1.35835	0.000282193	0.0109551	-	3	21262986	21265827	-	1510	protein_coding	PF16187:Middle or third domain of peptidase_M16	-
AT4G33880	59.7532	53.1456	29.6761	14.4672	56.4494	22.0717	1.35613	0.0370706	0.261024	BHLH85	4	16239363	16241169	-	1379	protein_coding	PF00010:Helix-loop-helix DNA-binding domain	HLH
AT1G06573	92.001	93.0048	42.3944	29.9678	92.5029	36.1811	1.35498	0.0060864	0.0877095	-	1	11738297	11739319	-	1023	lncRNA	-	-
AT2G46740	154.6	184.112	93.2677	39.2682	169.356	66.268	1.35463	0.00616726	0.0883758	GULLO5	2	19205157	19207608	-	1951	protein_coding	PF04030:D-arabinono-1,4-lactone oxidase|PF01565:FAD binding domain	FAD_binding_4
AT1G65510	250.394	332.16	136.722	91.9702	291.277	114.346	1.34947	0.000202301	0.008903	-	1	24359328	24360081	+	605	protein_coding	-	-
AT1G15640	61.6501	72.1262	36.0353	16.534	66.8881	26.2846	1.34889	0.0301577	0.23364	-	1	5378886	5380239	+	1270	protein_coding	-	-
AT2G44340	41.7324	70.2281	27.5564	16.534	55.9803	22.0452	1.34541	0.0419976	0.277807	VQ18	2	18314188	18315322	+	1135	protein_coding	PF05678:VQ motif	-
AT4G34800	106.228	95.8519	42.3944	37.2014	101.04	39.7979	1.34444	0.0036851	0.0630254	-	4	16596640	16597368	+	729	protein_coding	-	-
AT1G16916	386.973	484.954	137.782	205.641	435.963	171.712	1.34381	3.99e-05	0.00255833	-	1	5786557	5787329	-	685	protein_coding	-	-
AT5G51780	158.393	168.927	64.6515	65.1025	163.66	64.877	1.33491	0.000391228	0.013991	-	5	21034626	21036773	+	1105	protein_coding	PF00010:Helix-loop-helix DNA-binding domain	HLH
AT3G59900	259.879	124.323	60.412	91.9702	192.101	76.1911	1.33374	0.00613818	0.0880826	ARGOS	3	22129505	22130472	+	968	protein_coding	-	-
AT5G25250	613.656	625.41	149.44	342.047	619.533	245.743	1.33362	0.00069874	0.0209351	FLOT1	5	8749680	8751636	+	1713	protein_coding	PF01145:SPFH domain / Band 7 family	-
AT1G64780	1261.46	1392.22	649.694	405.082	1326.84	527.388	1.33126	3.69e-06	0.000416248	AMT1-2	1	24060640	24062804	-	2165	protein_coding	PF00909:Ammonium Transporter Family	Ammonium_transp
AT5G08185	117.609	119.578	54.0529	40.3016	118.594	47.1772	1.33045	0.00261334	0.0501545	MIR162A	5	2634905	2635044	-	140	miRNA	-	-
AT4G12850	86.3102	99.648	30.736	43.4017	92.9791	37.0688	1.326	0.00745032	0.099761	-	4	7536913	7539048	+	2136	protein_coding	PF13499:EF-hand domain pair	-
AT1G08283	51.217	61.6869	26.4965	18.6007	56.4519	22.5486	1.32474	0.0299681	0.232854	-	1	22076533	22077068	-	536	lncRNA	-	-
AT1G62262	54.0624	48.4005	25.4367	15.5006	51.2314	20.4686	1.32466	0.0401102	0.271819	SLAH4	1	23000157	23002096	-	1523	protein_coding	PF03595:Voltage-dependent anion channel	C4dic_mal_tran
AT5G63905	275.054	232.512	86.9086	115.738	253.783	101.323	1.32419	0.000131311	0.00643015	-	5	25570793	25571699	-	775	protein_coding	-	-
AT1G30700	1451.15	1520.34	641.216	545.621	1485.75	593.418	1.32418	1.17e-09	5.1e-07	-	1	10892445	10894714	+	2039	protein_coding	PF08031:Berberine and berberine like|PF01565:FAD binding domain	FAD_binding_4
AT3G46500	72.0832	69.2791	27.5564	28.9345	70.6812	28.2454	1.3232	0.0132795	0.142304	-	3	17120351	17122875	+	1864	protein_coding	PF03171:2OG-Fe(II) oxygenase superfamily	2OG-FeII_Oxy
AT4G20780	809.988	800.98	350.814	293.478	805.484	322.146	1.32232	4.01e-08	9.88e-06	CML42	4	11133095	11134075	-	981	protein_coding	PF13499:EF-hand domain pair|PF00036:EF hand	efhand
AT5G25910	62.5986	73.0752	20.1373	34.1013	67.8369	27.1193	1.32171	0.0231248	0.201626	AtRLP52	5	9038860	9041377	+	2436	protein_coding	PF13855:Leucine rich repeat|PF08263:Leucine rich repeat N-terminal domain	LRRNT_2
AT5G56795	627.883	415.674	201.373	217.008	521.779	209.191	1.31855	2.4e-05	0.00180812	MT1B	5	22971713	22972690	-	741	protein_coding	-	-
AT3G44450	409.736	279.014	75.2501	201.508	344.375	138.379	1.3148	0.00600591	0.0867946	BIC2	3	16073765	16074929	-	1165	protein_coding	-	-
AT2G46940	100.537	117.68	37.0951	50.6353	109.108	43.8652	1.314	0.00452966	0.0722708	-	2	19286434	19287590	-	1068	protein_coding	-	-
AT1G67920	203.92	161.335	93.2677	53.7354	182.627	73.5016	1.31381	0.00217002	0.0439877	-	1	25473544	25474140	+	597	protein_coding	-	-
AT2G39400	637.368	488.75	151.56	301.745	563.059	226.653	1.3124	0.000502356	0.016707	-	2	16452612	16455001	+	1507	protein_coding	PF12146:Serine aminopeptidase, S33	-
AT1G13590	413.53	422.318	244.828	91.9702	417.924	168.399	1.31188	0.00330602	0.0586524	PSK1	1	4647815	4649066	+	882	protein_coding	-	-
AT2G04800	301.611	261.932	145.201	82.6699	281.772	113.935	1.30694	0.000612728	0.0193176	-	2	1687173	1687939	-	767	protein_coding	-	-
AT2G17660	57.8563	66.432	26.4965	23.7676	62.1441	25.132	1.30633	0.0216156	0.192757	-	2	7673145	7673712	+	568	protein_coding	-	-
AT5G11210	126.146	111.985	51.9332	44.4351	119.066	48.1841	1.30545	0.00256901	0.0495055	GLR2.5	5	3571020	3574817	-	3504	protein_coding	PF00497:Bacterial extracellular solute-binding proteins, family 3|PF00060:Ligand-gated ion channel|PF01094:Receptor family ligand binding region	ANF_receptor
AT1G53490	186.847	175.57	81.6093	65.1025	181.209	73.3559	1.30508	0.000441808	0.0151626	HEI10	1	19963267	19966952	+	2252	protein_coding	PF14634:zinc-RING finger domain	-
AT1G18100	564.336	683.3	362.472	143.639	623.818	253.056	1.30205	0.00201796	0.0419194	MFT	1	6227217	6230194	-	1438	protein_coding	PF01161:Phosphatidylethanolamine-binding protein	-
AT1G31258	417.324	583.653	201.373	204.608	500.488	202.991	1.3019	1.14e-05	0.000995101	-	1	11171225	11171835	+	135	ncRNA	-	-
AT3G05715	59.7532	48.4005	18.0176	25.8343	54.0768	21.926	1.3016	0.0363804	0.257739	-	3	11154243	11154343	+	101	snoRNA	-	-
AT4G21410	3009.48	2606.98	1041.84	1236.95	2808.23	1139.4	1.30133	1.54e-09	6.41e-07	CRK29	4	11401711	11405235	-	3076	protein_coding	PF07714:Protein tyrosine kinase|PF01657:Salt stress response/antifungal	Pkinase_Tyr
AT2G42350	364.21	385.306	184.416	119.871	374.758	152.144	1.30102	7.77e-05	0.00440745	ATL40	2	17639001	17640300	+	1300	protein_coding	PF13639:Ring finger domain	-
AT2G05440	21763.4	21324.7	9806.89	7693.46	21544.1	8750.18	1.29992	3.54e-10	1.95e-07	ATGRP9	2	1993038	1994177	+	782	protein_coding	PF07172:Glycine rich protein family	-
AT1G07175	66.3925	65.483	37.0951	16.534	65.9377	26.8145	1.29946	0.0373154	0.262481	-	1	2202278	2203366	+	789	protein_coding	-	-
AT2G47950	140.373	107.24	65.7113	35.1347	123.806	50.423	1.29686	0.00864595	0.109727	-	2	19624022	19624922	+	901	protein_coding	-	-
AT1G25275	4811.56	4178.57	1279.25	2380.89	4495.06	1830.07	1.29637	3.02e-05	0.00207884	-	1	8860527	8861522	+	820	protein_coding	-	-
AT3G07735	45.5263	52.1966	21.1972	18.6007	48.8614	19.899	1.2963	0.0404293	0.272746	-	3	17445699	17445771	+	73	snoRNA	-	-
AT5G05440	1109.7	937.64	381.55	452.618	1023.67	417.084	1.29521	8.95e-08	2.01e-05	PYL5	5	1608988	1610527	+	1540	protein_coding	PF10604:Polyketide cyclase / dehydrase and lipid transport	-
AT2G47380	2506.79	2540.55	794.895	1261.75	2523.67	1028.32	1.29511	1.89e-06	0.000235093	-	2	19440923	19442053	+	937	protein_coding	-	-
AT5G12880	170.723	203.092	111.285	41.3349	186.908	76.3101	1.29326	0.0112825	0.128628	-	5	4068426	4069094	-	669	protein_coding	-	-
AT3G27660	86.3102	151.845	46.6339	50.6353	119.077	48.6346	1.2917	0.00828582	0.106913	OL2	3	10243244	10245023	+	1385	protein_coding	PF01277:Oleosin	-
AT5G47960	168.827	154.692	80.5494	51.6687	161.759	66.109	1.29165	0.00183988	0.0396971	RABA4C	5	19421340	19422533	-	925	protein_coding	PF00071:Ras family	Ras
AT3G02800	86.3102	103.444	46.6339	31.0012	94.8771	38.8175	1.29012	0.00972652	0.118435	DSP3	3	606285	607907	-	1168	protein_coding	PF03162:Tyrosine phosphatase family	-
AT5G39520	310.148	475.463	210.912	110.571	392.805	160.742	1.28952	0.00149738	0.0343944	-	5	15823735	15825566	-	1028	protein_coding	PF09366:Protein of unknown function (DUF1997)	-
ATCG00350	75.8771	200.245	60.412	52.702	138.061	56.557	1.28767	0.020342	0.186468	PSAA	Pt	39605	41857	-	2253	protein_coding	PF00223:Photosystem I psaA/psaB protein	-
AT5G52471	95.7948	108.189	33.9155	49.6019	101.992	41.7587	1.28758	0.00717918	0.0974698	U60.1F	5	21295736	21295809	+	74	snoRNA	-	-
AT5G26920	544.418	523.864	144.141	293.478	534.141	218.81	1.28711	0.000531069	0.0173234	CBP60G	5	9475679	9478777	+	2306	protein_coding	PF07887:Calmodulin binding protein-like	-
AT2G28710	105.279	84.4635	55.1127	22.7342	94.8715	38.9235	1.28655	0.0256712	0.215338	-	2	12322386	12323584	+	677	protein_coding	PF13912:C2H2-type zinc finger	-
AT5G35732	327.22	307.485	114.465	145.706	317.353	130.085	1.28627	3.52e-05	0.00232557	-	5	13897778	13899087	+	910	protein_coding	-	-
AT5G59530	131.836	185.061	78.4297	51.6687	158.448	65.0492	1.28503	0.00321884	0.057809	-	5	23994170	23995865	-	1509	protein_coding	PF14226:non-haem dioxygenase in morphine synthesis N-terminal|PF03171:2OG-Fe(II) oxygenase superfamily	2OG-FeII_Oxy
AT1G13110	4490.03	3148.88	1484.86	1652.36	3819.45	1568.61	1.28385	1.85e-07	3.52e-05	CYP71B7	1	4467094	4469033	+	1869	protein_coding	PF00067:Cytochrome P450	p450
AT5G24230	262.724	222.073	113.405	85.77	242.399	99.5875	1.28378	0.000234953	0.00964917	-	5	8228829	8230964	+	1582	protein_coding	PF01764:Lipase (class 3)	Lipase_3
AT1G52827	364.21	554.233	147.321	230.442	459.221	188.881	1.28136	0.00037677	0.0136171	CDT1	1	19671300	19672021	-	575	protein_coding	-	-
AT2G04025	62.5986	77.8203	40.2747	17.5673	70.2095	28.921	1.28086	0.0390161	0.267622	RGF3	2	1276683	1277761	-	839	protein_coding	-	-
AT2G43060	349.983	271.422	156.859	99.2038	310.703	128.032	1.27955	0.000428875	0.0148939	IBH1	2	17909007	17910210	+	1204	protein_coding	-	-
AT1G71740	172.62	121.476	96.4473	24.801	147.048	60.6241	1.2793	0.0400299	0.271655	-	1	26987245	26987637	+	393	protein_coding	-	-
AT5G53250	283.591	297.995	170.638	69.236	290.793	119.937	1.27839	0.00453162	0.0722708	AGP22	5	21603569	21604414	+	745	protein_coding	-	-
AT5G43170	274.106	240.104	89.0283	122.971	257.105	106	1.27782	0.000219555	0.00934022	AZF3	5	17330945	17331646	-	702	protein_coding	PF13912:C2H2-type zinc finger	-
AT1G74810	131.836	174.621	52.993	73.3695	153.229	63.1813	1.27758	0.00244193	0.0478085	BOR5	1	28107822	28111940	+	3266	protein_coding	PF00955:HCO3- transporter family	-
AT1G29020	67.3409	85.4126	45.574	17.5673	76.3767	31.5707	1.2759	0.0413337	0.27573	-	1	10120300	10122973	-	2065	protein_coding	PF13202:EF hand	-
AT3G51350	233.322	235.359	103.866	89.9035	234.341	96.8849	1.27452	0.000117001	0.00587018	-	3	19060261	19063538	-	2101	protein_coding	PF14543:Xylanase inhibitor N-terminal|PF14541:Xylanase inhibitor C-terminal	-
AT4G20000	330.065	279.963	133.542	118.838	305.014	126.19	1.27346	4.02e-05	0.00255859	-	4	10838310	10839335	+	1026	protein_coding	PF05678:VQ motif	-
AT1G65790	183.053	87.3106	52.993	58.9023	135.182	55.9477	1.27262	0.0119393	0.132428	SD17	1	24468770	24472475	+	2925	protein_coding	PF00954:S-locus glycoprotein domain|PF11883:Domain of unknown function (DUF3403)|PF12398:Receptor serine/threonine kinase|PF07714:Protein tyrosine kinase|PF01453:D-mannose binding lectin|PF08276:PAN-like domain	Pkinase_Tyr
AT1G66700	75.8771	74.9732	15.8979	46.5018	75.4252	31.1999	1.27207	0.0482008	0.298827	PXMT1	1	24873206	24874766	-	1476	protein_coding	PF03492:SAM dependent carboxyl methyltransferase	-
AT3G47510	455.263	457.432	217.271	161.206	456.347	189.239	1.27028	1.19e-05	0.0010258	-	3	17510981	17511858	+	693	protein_coding	-	-
AT5G58650	287.384	278.065	108.106	127.105	282.725	117.605	1.26518	5.04e-05	0.00302933	PSY1	5	23699708	23700226	-	439	protein_coding	-	-
AT5G18780	298.766	281.861	118.704	122.971	290.314	120.838	1.26448	3.08e-05	0.00210711	-	5	6264245	6266174	+	1850	protein_coding	PF08387:FBD	-
AT2G05540	1276.63	1615.25	600.941	603.49	1445.94	602.215	1.26365	4.85e-08	1.13e-05	-	2	2033154	2034283	+	824	protein_coding	PF07172:Glycine rich protein family	-
AT1G68500	305.405	352.09	83.729	190.141	328.747	136.935	1.26288	0.0030378	0.0553948	-	1	25701770	25702778	+	1009	protein_coding	-	-
AT5G35110	92.001	98.699	41.3346	38.2348	95.35	39.7847	1.26118	0.00691368	0.0951329	-	5	13363527	13364411	-	885	protein_coding	-	-
AT5G49525	77.774	70.2281	32.8557	28.9345	74.0011	30.8951	1.26045	0.0159686	0.160393	-	5	20096932	20097551	-	620	protein_coding	-	-
AT2G37430	101.486	112.934	25.4367	64.0691	107.21	44.7529	1.25921	0.024251	0.208059	ZAT11	2	15706285	15707224	+	940	protein_coding	PF13912:C2H2-type zinc finger	-
AT3G54150	169.775	148.997	38.155	95.0703	159.386	66.6127	1.25771	0.0131677	0.14137	-	3	20050564	20052931	-	1486	protein_coding	PF08241:Methyltransferase domain	Methyltransf_11
AT1G67860	478.026	452.687	187.595	202.541	465.356	195.068	1.25425	1.95e-06	0.000241636	-	1	25444752	25445357	-	606	protein_coding	-	-
AT4G18430	348.086	292.301	217.271	51.6687	320.193	134.47	1.25222	0.0272524	0.223301	RABA1E	4	10183671	10185383	-	1046	protein_coding	PF00071:Ras family	Ras
AT1G05213	82.5163	111.985	42.3944	39.2682	97.2508	40.8313	1.25218	0.00918898	0.11391	-	1	5479274	5481730	-	2457	lncRNA	-	-
AT1G21120	404.046	249.594	86.9086	188.074	326.82	137.491	1.24864	0.00542553	0.0818843	-	1	7395179	7396823	-	1457	protein_coding	PF08100:Dimerisation domain|PF00891:O-methyltransferase	-
AT2G45860	1040.46	1353.31	444.082	564.222	1196.89	504.152	1.24722	1.87e-06	0.000234411	-	2	18874566	18875653	-	672	protein_coding	-	-
AT4G37010	312.993	372.019	182.296	106.437	342.506	144.367	1.24692	0.000593911	0.0188905	CEN2	4	17444129	17445615	+	1031	protein_coding	PF13499:EF-hand domain pair	-
AT5G44460	86.3102	105.342	50.8733	29.9678	95.8262	40.4206	1.24624	0.0149581	0.154186	CML43	5	17916993	17918001	+	1009	protein_coding	PF13499:EF-hand domain pair|PF13405:EF-hand domain	-
AT4G14780	168.827	186.959	92.2079	57.8689	177.893	75.0384	1.246	0.00212554	0.0434469	-	4	8492213	8494663	+	2054	protein_coding	PF07714:Protein tyrosine kinase	Pkinase_Tyr
AT4G02520	846.03	685.199	304.18	342.047	765.614	323.113	1.24447	9.83e-07	0.000142321	GSTF2	4	1110343	1112033	-	1471	protein_coding	PF00043:Glutathione S-transferase, C-terminal domain|PF02798:Glutathione S-transferase, N-terminal domain	GST_N
AT5G08240	430.602	496.342	199.254	192.207	463.472	195.731	1.24366	3.8e-06	0.000423707	-	5	2650837	2652535	-	1521	protein_coding	-	-
AT3G09270	3192.53	3600.61	1658.68	1211.11	3396.57	1434.9	1.24321	1.81e-07	3.52e-05	GSTU8	3	2848183	2849686	-	1359	protein_coding	PF00043:Glutathione S-transferase, C-terminal domain|PF13417:Glutathione S-transferase, N-terminal domain	GST_C
AT4G25350	287.384	177.468	91.148	105.404	232.426	98.276	1.24168	0.00144359	0.0334598	PHO1-H4	4	12962965	12966629	-	2836	protein_coding	PF03124:EXS family|PF03105:SPX domain	SPX
AT5G11920	133.733	132.864	48.7536	64.0691	133.299	56.4114	1.24009	0.00293734	0.0540142	CWINV6	5	3839316	3842409	+	2300	protein_coding	PF08244:Glycosyl hydrolases family 32 C terminal|PF00251:Glycosyl hydrolases family 32 N-terminal domain	-
AT1G03850	228.58	289.454	137.782	81.6365	259.017	109.709	1.23995	0.00137237	0.0323228	-	1	975871	977911	-	1441	protein_coding	-	-
AT2G46130	136.579	161.335	89.0283	37.2014	148.957	63.1149	1.2398	0.0146445	0.151875	WRKY43	2	18957212	18957925	+	628	protein_coding	PF03106:WRKY DNA -binding domain	WRKY
AT5G63560	959.845	1108.47	526.751	350.314	1034.16	438.532	1.23792	1.12e-05	0.000988529	FACT	5	25449311	25451419	+	1672	protein_coding	PF02458:Transferase family	-
AT5G54710	1519.44	1061.96	398.508	696.494	1290.7	547.501	1.23705	0.00021206	0.00912168	-	5	22227483	22230663	-	2142	protein_coding	PF12796:Ankyrin repeats (3 copies)|PF13962:Domain of unknown function	-
AT3G46090	112.867	88.2596	28.6162	56.8355	100.563	42.7259	1.2339	0.020289	0.186357	ZAT7	3	16925881	16926883	-	1003	protein_coding	PF13912:C2H2-type zinc finger	-
AT5G44572	815.679	882.596	295.701	426.783	849.138	361.242	1.23277	7.19e-06	0.000709184	-	5	17968092	17970342	+	1376	protein_coding	-	-
AT2G16790	414.479	465.973	160.039	214.942	440.226	187.49	1.23109	3.16e-05	0.00214409	-	2	7283928	7285345	-	1324	protein_coding	PF01202:Shikimate kinase	SKI
AT1G09794	125.197	167.978	80.5494	44.4351	146.588	62.4922	1.23082	0.00828809	0.106913	-	1	3171905	3173510	+	672	protein_coding	-	-
AT5G05370	1793.54	1847.76	562.786	988.938	1820.65	775.862	1.23043	4.49e-05	0.00275168	-	5	1590797	1591939	-	469	protein_coding	-	-
AT5G26731	174.517	213.531	52.993	112.638	194.024	82.8154	1.22747	0.00720437	0.09762	-	5	9295341	9296380	+	1040	protein_coding	-	-
AT4G01750	1377.17	944.283	575.504	416.449	1160.73	495.977	1.22683	3.45e-05	0.00228502	RGXT2	4	756348	758725	+	1651	protein_coding	PF03407:Nucleotide-diphospho-sugar transferase	-
AT2G41690	55.9594	97.7499	27.5564	38.2348	76.8546	32.8956	1.22367	0.0331173	0.245224	HSFB3	2	17381647	17382851	+	1085	protein_coding	PF00447:HSF-type DNA-binding	HSF_DNA-bind
novel.9	117.609	106.291	32.8557	63.0358	111.95	47.9457	1.2224	0.0144535	0.150701	-	1	11228873	11230076	+	891	-	PF01157:Ribosomal protein L21e	-
AT2G24430	126.146	148.048	76.31	41.3349	137.097	58.8224	1.22163	0.00884935	0.110902	ANAC038	2	10383497	10386625	-	1093	protein_coding	PF02365:No apical meristem (NAM) protein	NAM
AT2G25510	6566.21	2390.6	1692.6	2150.45	4478.41	1921.52	1.22072	0.00290137	0.0536271	-	2	10856271	10857217	+	760	protein_coding	-	-
AT5G57290	12871.6	13341.4	4149.35	7108.58	13106.5	5628.96	1.21932	1.5e-05	0.00121471	RPP3B	5	23206696	23207961	-	842	protein_coding	PF00428:60s Acidic ribosomal protein	-
AT1G53700	308.251	260.983	154.74	89.9035	284.617	122.322	1.21893	0.0012209	0.0299648	WAG1	1	20048434	20050294	+	1861	protein_coding	PF00069:Protein kinase domain	Pkinase
AT1G10070	161.239	113.883	61.4719	56.8355	137.561	59.1537	1.21767	0.00431056	0.0698031	BCAT2	1	3288087	3290471	+	1752	protein_coding	PF01063:Amino-transferase class IV	-
AT3G24310	65.444	87.3106	27.5564	38.2348	76.3773	32.8956	1.21461	0.0242363	0.20803	MYB305	3	8811011	8812483	-	1288	protein_coding	PF00249:Myb-like DNA-binding domain	Myb_DNA-binding
AT1G26470	1777.42	1882.87	535.23	1042.67	1830.15	788.952	1.2138	0.000210402	0.00908333	-	1	9155091	9156370	+	779	protein_coding	-	-
AT2G40750	132.785	56.9417	49.8134	32.0346	94.8633	40.924	1.21348	0.0425878	0.280258	WRKY54	2	17000419	17002528	-	1432	protein_coding	PF03106:WRKY DNA -binding domain	WRKY
AT5G12280	122.352	98.699	55.1127	40.3016	110.525	47.7072	1.21268	0.00846691	0.10822	-	5	3971715	3973800	-	1873	protein_coding	PF01805:Surp module	-
AT3G45290	335.756	238.206	119.764	128.138	286.981	123.951	1.2111	0.000350062	0.0127876	MLO3	3	16617398	16621370	+	1733	protein_coding	PF03094:Mlo family	-
AT4G15233	1492.88	908.22	417.585	620.024	1200.55	518.805	1.2103	0.0002415	0.00974591	ABCG42	4	8687354	8694733	+	5360	protein_coding	PF00005:ABC transporter|PF01061:ABC-2 type transporter|PF08370:Plant PDR ABC transporter associated	ABC2_membrane
AT3G26470	540.624	671.912	321.138	204.608	606.268	262.873	1.20591	0.000142707	0.00685938	-	3	9685932	9687642	+	1620	protein_coding	PF05659:Arabidopsis broad-spectrum mildew resistance protein RPW8	-
AT1G64490	829.906	968.958	418.645	361.681	899.432	390.163	1.20506	5.96e-07	9.39e-05	-	1	23952133	23952839	+	707	protein_coding	PF08766:DEK C terminal domain	-
AT5G24270	659.182	723.16	349.754	251.11	691.171	300.432	1.20228	1.32e-05	0.00111671	CBL4	5	8238428	8243443	-	4417	protein_coding	PF13499:EF-hand domain pair	-
AT2G44010	214.353	294.199	144.141	77.503	254.276	110.822	1.19875	0.00393011	0.0652994	-	2	18216574	18217453	+	880	protein_coding	-	-
AT3G48920	218.147	240.104	138.842	60.969	229.125	99.9054	1.19824	0.00785419	0.103074	AtMYB45	3	18139172	18140772	+	1217	protein_coding	PF00249:Myb-like DNA-binding domain	Myb_DNA-binding
AT5G39240	72.0832	76.8713	43.4543	21.7008	74.4773	32.5776	1.19408	0.0382659	0.265433	-	5	15712549	15713158	-	610	protein_coding	-	-
AT2G32660	237.116	279.014	146.261	79.5697	258.065	112.915	1.19313	0.00269282	0.0512464	AtRLP22	2	13853699	13856297	-	2599	protein_coding	PF13855:Leucine rich repeat	-
AT4G25434	81.5679	69.2791	41.3346	24.801	75.4235	33.0678	1.19052	0.0305541	0.235351	ATNUDT10	4	13003568	13005935	-	2138	protein_coding	PF00293:NUDIX domain	NUDIX
AT4G36500	1740.43	1800.31	727.064	824.632	1770.37	775.848	1.19013	8.69e-09	2.73e-06	-	4	17225793	17226833	-	1041	protein_coding	-	-
AT4G01250	651.595	526.711	198.194	318.279	589.153	258.236	1.18961	0.000224198	0.00943942	WRKY22	4	522530	524249	-	1326	protein_coding	PF03106:WRKY DNA -binding domain	WRKY
AT1G29465	147.96	146.15	34.9754	94.037	147.055	64.5062	1.18788	0.0246698	0.209919	-	1	10308520	10309896	+	618	protein_coding	-	-
AT3G08275	59.7532	90.1577	28.6162	37.2014	74.9555	32.9088	1.18706	0.0311462	0.237759	-	3	19506330	19506371	+	42	snoRNA	-	-
AT3G10090	841.287	912.016	253.307	516.687	876.652	384.997	1.18688	0.00081758	0.0231553	RPS28A	3	3108789	3110094	-	538	protein_coding	-	-
AT1G72416	580.46	365.376	170.638	244.909	472.918	207.774	1.18631	0.000760355	0.0220164	-	1	27258747	27260521	-	1399	protein_coding	PF00226:DnaJ domain	DnaJ
AT3G55470	705.657	672.861	253.307	352.38	689.259	302.843	1.1862	1.45e-05	0.00118808	-	3	20564081	20566329	+	983	protein_coding	PF00168:C2 domain	C2
AT5G42060	763.513	819.961	219.391	476.385	791.737	347.888	1.1861	0.00145241	0.0336018	-	5	16818388	16818955	-	568	protein_coding	PF08766:DEK C terminal domain	-
AT5G35480	150.806	309.383	117.645	84.7366	230.094	101.191	1.18545	0.00879689	0.110611	-	5	13687847	13689596	-	883	protein_coding	-	-
AT4G15563	226.683	278.065	125.064	97.1371	252.374	111.1	1.18406	0.000553283	0.017905	-	4	8890211	8892577	+	2293	protein_coding	-	-
AT3G13520	2903.25	2961.92	792.776	1788.77	2932.58	1290.77	1.18384	0.000931793	0.0250358	AGP12	3	4408925	4409734	+	810	protein_coding	-	-
AT2G25210	3641.15	3899.56	952.815	2369.53	3770.35	1661.17	1.18243	0.00184909	0.0397875	-	2	10739855	10740552	+	402	protein_coding	-	-
AT1G14860	451.469	633.002	268.145	209.775	542.235	238.96	1.18236	0.000111948	0.00570295	NUDT18	1	5124670	5126280	+	1329	protein_coding	PF00293:NUDIX domain	NUDIX
AT5G02420	146.063	161.335	90.0881	45.4684	153.699	67.7783	1.18208	0.0103697	0.122896	SMR3	5	523257	524076	+	820	protein_coding	-	-
AT1G23140	303.508	289.454	118.704	142.606	296.481	130.655	1.1819	0.000121756	0.00607887	CAR8	1	8202146	8203301	-	843	protein_coding	PF00168:C2 domain	C2
AT4G18250	147.012	113.883	54.0529	60.969	130.448	57.511	1.18135	0.00514461	0.0785737	-	4	10087205	10090276	-	2250	protein_coding	PF07714:Protein tyrosine kinase|PF00314:Thaumatin family	Thaumatin
ATCG00680	143.218	236.308	85.8487	81.6365	189.763	83.7426	1.18023	0.00397553	0.0658397	PSBB	Pt	72371	73897	+	1527	protein_coding	PF00421:Photosystem II protein	-
AT1G78815	118.558	64.5339	51.9332	28.9345	91.5459	40.4338	1.17975	0.0403118	0.27264	LSH7	1	29631743	29632791	-	1049	protein_coding	PF04852:Protein of unknown function (DUF640)	-
AT5G63600	5269.66	6234.17	3119.17	1959.28	5751.92	2539.22	1.1797	1.59e-05	0.00127211	FLS5	5	25460591	25462568	-	1772	protein_coding	PF03171:2OG-Fe(II) oxygenase superfamily|PF14226:non-haem dioxygenase in morphine synthesis N-terminal	2OG-FeII_Oxy
AT1G01210	931.391	1109.41	307.36	594.19	1020.4	450.775	1.17842	0.000576582	0.0184543	-	1	88622	90502	+	1081	protein_coding	PF01096:Transcription factor S-II (TFIIS)|PF02150:RNA polymerases M/15 Kd subunit	-
AT2G43390	158.393	140.456	79.4895	52.702	149.425	66.0958	1.17745	0.00486323	0.0752897	-	2	18020229	18020879	-	651	protein_coding	-	-
AT1G14540	188.744	186.959	71.0106	95.0703	187.851	83.0405	1.17722	0.0014048	0.0329264	PER4	1	4974021	4975705	-	1265	protein_coding	PF00141:Peroxidase	-
AT3G59880	244.704	230.614	107.046	103.337	237.659	105.192	1.17593	0.000263037	0.0104702	-	3	22120876	22121957	+	1082	protein_coding	-	-
AT3G09020	156.496	124.323	55.1127	69.236	140.41	62.1744	1.17486	0.00461544	0.07306	-	3	2753307	2754621	+	1315	protein_coding	PF04488:Glycosyltransferase sugar-binding region containing DXD motif|PF04572:Alpha 1,4-glycosyltransferase conserved region	Gly_transf_sug
AT5G09125	56.9078	54.0946	24.3768	24.801	55.5012	24.5889	1.17448	0.0443456	0.285527	-	5	25290913	25291912	-	614	lncRNA	-	-
AT5G16570	120.455	99.648	59.3522	38.2348	110.051	48.7935	1.17417	0.0129361	0.139765	GLN1-4	5	5421589	5424749	-	1685	protein_coding	PF03951:Glutamine synthetase, beta-Grasp domain|PF00120:Glutamine synthetase, catalytic domain	-
AT1G08310	67.3409	62.6359	31.7958	25.8343	64.9884	28.8151	1.1738	0.0329325	0.244539	-	1	2618647	2620452	+	1483	protein_coding	PF12146:Serine aminopeptidase, S33	-
AT3G48020	73.0317	93.9538	24.3768	49.6019	83.4928	36.9894	1.17345	0.0380146	0.264754	-	3	17724400	17725198	+	799	protein_coding	-	-
AT3G46560	2753.39	3320.65	957.054	1737.1	3037.02	1347.08	1.17273	0.000160731	0.00745936	TIM9	3	17138476	17139582	+	719	protein_coding	-	-
AT5G44210	222.889	227.767	66.7712	133.305	225.328	100.038	1.17076	0.00544319	0.08209	ERF9	5	17806397	17807541	+	1145	protein_coding	PF00847:AP2 domain	AP2
AT5G07390	121.403	157.539	82.6691	41.3349	139.471	62.002	1.17044	0.015842	0.159592	RBOHA	5	2335895	2339913	-	3160	protein_coding	PF08030:Ferric reductase NAD binding domain|PF08022:FAD-binding domain|PF08414:Respiratory burst NADPH oxidase|PF01794:Ferric reductase like transmembrane component	FAD_binding_8
AT1G22690	1206.45	1256.51	368.831	725.428	1231.48	547.13	1.17023	0.000504588	0.0167268	GASA9	1	8027126	8028168	+	764	protein_coding	PF02704:Gibberellin regulated protein	-
AT5G43290	790.07	447.941	251.187	299.678	619.006	275.433	1.16815	0.000641193	0.0198682	WRKY49	5	17371808	17373221	-	1142	protein_coding	PF03106:WRKY DNA -binding domain	WRKY
AT2G36295	205.817	220.175	108.106	81.6365	212.996	94.8711	1.16723	0.000955562	0.0253633	-	2	15211514	15212400	+	887	protein_coding	-	-
AT1G23560	201.074	254.34	145.201	57.8689	227.707	101.535	1.16591	0.0150311	0.154186	-	1	8352615	8354619	-	1598	protein_coding	PF02713:Domain of unknown function DUF220	-
AT2G21195	486.562	535.252	151.56	304.845	510.907	228.203	1.16233	0.00174285	0.0381356	-	2	9083144	9083909	+	697	protein_coding	-	-
AT1G68945	171.672	208.786	64.6515	105.404	190.229	85.0278	1.16108	0.00421818	0.068798	-	1	25926849	25927337	+	489	protein_coding	-	-
AT1G74440	190.641	184.112	66.7712	101.271	187.376	84.0209	1.1565	0.00278078	0.052525	-	1	27976502	27980456	-	2394	protein_coding	PF06127:Protein of unknown function (DUF962)	-
AT1G21110	957	599.786	410.166	288.311	778.393	349.239	1.15647	0.000453251	0.0154514	IGMT3	1	7389981	7391603	-	1435	protein_coding	PF08100:Dimerisation domain|PF00891:O-methyltransferase	-
ATCG00220	69.2378	74.9732	25.4367	39.2682	72.1055	32.3524	1.15541	0.0340707	0.248828	PSBM	Pt	28707	28811	-	105	protein_coding	-	-
AT5G23510	1152.38	714.618	360.353	478.452	933.501	419.402	1.15419	0.000269561	0.010709	-	5	7926945	7929387	+	1479	protein_coding	-	-
AT3G14680	666.77	609.276	387.909	186.007	638.023	286.958	1.15312	0.00185539	0.0398392	CYP72A14	3	4934330	4936644	+	1869	protein_coding	PF00067:Cytochrome P450	p450
AT2G46440	663.925	398.592	186.535	291.411	531.258	238.973	1.1523	0.00172132	0.0379582	CNGC11	2	19061688	19064937	+	2648	protein_coding	PF00520:Ion transport protein	Ion_trans
AT5G38550	367.055	329.313	219.391	94.037	348.184	156.714	1.15226	0.00689189	0.0950252	JAL44	5	15432781	15435851	-	2245	protein_coding	PF01419:Jacalin-like lectin domain	-
AT1G19050	604.171	844.635	328.557	323.446	724.403	326.001	1.15192	2.83e-05	0.00202177	ARR7	1	6577833	6579314	-	943	protein_coding	PF00072:Response regulator receiver domain	Response_reg
AT3G50480	6684.77	4431.96	1961.8	3052.58	5558.37	2507.19	1.14855	0.000141793	0.00685938	HR4	3	18733021	18734420	+	1109	protein_coding	PF05659:Arabidopsis broad-spectrum mildew resistance protein RPW8	-
AT2G23680	984.505	819.961	337.036	477.418	902.233	407.227	1.14745	3.4e-05	0.00226093	-	2	10066117	10067737	+	1360	protein_coding	PF05562:Cold acclimation protein WCOR413	-
AT4G23550	1003.47	972.754	425.004	467.085	988.114	446.044	1.14741	2.08e-07	3.72e-05	WRKY29	4	12291632	12293367	+	1393	protein_coding	PF03106:WRKY DNA -binding domain	WRKY
AT1G62975	2190	2410.53	1382.06	696.494	2300.27	1039.28	1.14634	0.000515293	0.0169714	BHLH125	1	23328727	23330812	+	1554	protein_coding	PF00010:Helix-loop-helix DNA-binding domain	HLH
AT4G23810	699.018	566.57	270.264	301.745	632.794	286.005	1.14559	1.17e-05	0.00101706	WRKY53	4	12392370	12393982	-	1514	protein_coding	PF03106:WRKY DNA -binding domain	WRKY
AT5G03700	708.502	735.497	301	352.38	722	326.69	1.14392	2.2e-06	0.000269509	-	5	965562	967432	-	1871	protein_coding	PF01453:D-mannose binding lectin	B_lectin
AT2G18360	428.706	439.4	259.666	133.305	434.053	196.485	1.14391	0.00198366	0.0416451	-	2	7976700	7979430	-	1371	protein_coding	PF00561:alpha/beta hydrolase fold	Abhydrolase_1
AT1G28470	82.5163	123.374	50.8733	42.3683	102.945	46.6208	1.14314	0.0177325	0.171285	NAC010	1	10010124	10012258	+	1471	protein_coding	PF02365:No apical meristem (NAM) protein	NAM
AT5G50090	61.6501	65.483	32.8557	24.801	63.5665	28.8283	1.14136	0.0407706	0.273608	-	5	20369657	20371391	+	1374	protein_coding	PF14009:Domain of unknown function (DUF4228)	-
AT4G37610	355.674	435.604	181.236	177.74	395.639	179.488	1.14032	6.7e-05	0.00387826	BT5	4	17670481	17672353	-	1438	protein_coding	PF02135:TAZ zinc finger|PF00651:BTB/POZ domain	zf-TAZ
AT2G30840	383.179	378.662	232.109	113.671	380.921	172.89	1.14015	0.00329419	0.0585442	-	2	13135314	13137004	-	1604	protein_coding	PF03171:2OG-Fe(II) oxygenase superfamily|PF14226:non-haem dioxygenase in morphine synthesis N-terminal	2OG-FeII_Oxy
AT1G67110	210.559	227.767	105.986	93.0036	219.163	99.4948	1.13953	0.000676249	0.0205186	CYP735A2	1	25061673	25065446	-	1993	protein_coding	PF00067:Cytochrome P450	p450
AT5G64100	3192.53	3212.46	1977.7	930.036	3202.49	1453.87	1.13938	0.000869096	0.0240148	PER69	5	25650567	25652247	-	1438	protein_coding	PF00141:Peroxidase	-
AT1G49310	426.809	528.609	320.078	114.704	477.709	217.391	1.13625	0.0127397	0.13867	-	1	18237701	18238497	-	717	protein_coding	-	-
AT4G22305	426.809	302.74	130.363	201.508	364.774	165.935	1.136	0.00149393	0.0343537	SOBER1	4	11789327	11791207	-	1135	protein_coding	PF02230:Phospholipase/Carboxylesterase	Abhydrolase_2
AT5G44580	5231.73	4002.05	1700.02	2503.86	4616.89	2101.94	1.13515	2.44e-05	0.00181075	-	5	17979149	17980550	+	844	protein_coding	-	-
AT1G58590	400.252	487.801	206.673	198.408	444.026	202.54	1.13248	4.39e-05	0.00271055	-	1	21742944	21743891	-	803	ncRNA	-	-
AT3G18690	193.487	242.951	72.0705	127.105	218.219	99.5877	1.1311	0.00559545	0.083645	MKS1	3	6429534	6430517	-	984	protein_coding	PF05678:VQ motif	-
AT2G26360	138.476	134.762	74.1902	50.6353	136.619	62.4128	1.13088	0.0073568	0.0990282	-	2	11221516	11223400	-	1491	protein_coding	PF00153:Mitochondrial carrier protein	Mito_carr
AT4G26055	102.434	101.546	48.7536	44.4351	101.99	46.5943	1.13039	0.0112979	0.128668	-	4	13213769	13214509	-	598	protein_coding	-	-
AT3G26500	474.232	355.886	160.039	219.075	415.059	189.557	1.13038	0.000433116	0.0149423	PIRL2	3	9707912	9710100	-	1855	protein_coding	PF13855:Leucine rich repeat	-
AT1G17285	63.5471	53.1456	28.6162	24.801	58.3463	26.7086	1.12764	0.049915	0.304531	-	1	5920542	5921483	+	837	protein_coding	-	-
AT1G50960	236.167	194.551	121.884	75.4363	215.359	98.6601	1.12681	0.00388385	0.0647944	GA2OX7	1	18889473	18891838	+	1206	protein_coding	PF03171:2OG-Fe(II) oxygenase superfamily|PF14226:non-haem dioxygenase in morphine synthesis N-terminal	2OG-FeII_Oxy
AT5G06300	910.525	1123.65	519.332	412.316	1017.09	465.824	1.12673	1.04e-05	0.000929987	LOG7	5	1921548	1925407	-	1277	protein_coding	PF03641:Possible lysine decarboxylase	-
AT5G55560	211.507	183.162	85.8487	95.0703	197.335	90.4595	1.12513	0.00130717	0.0313913	WNK11	5	22506216	22507879	-	1328	protein_coding	PF00069:Protein kinase domain	Pkinase
AT3G52535	82.5163	72.1262	23.3169	47.5352	77.3212	35.4261	1.12494	0.0488328	0.301441	-	3	19487129	19488551	+	1423	lncRNA	-	-
AT3G54880	880.174	1176.8	633.797	310.012	1028.48	471.904	1.12417	0.00205485	0.0425127	-	3	20336687	20338598	-	1060	protein_coding	PF13259:Protein of unknown function (DUF4050)	-
AT2G44380	393.612	404.286	221.511	144.672	398.949	183.092	1.12407	0.000460994	0.0156371	-	2	18323366	18324561	-	1196	protein_coding	PF03107:C1 domain	-
AT5G36960	82.5163	70.2281	33.9155	36.1681	76.3722	35.0418	1.12384	0.0271836	0.223134	-	5	14598607	14599988	+	811	protein_coding	-	-
AT5G09295	145.115	119.578	67.8311	53.7354	132.346	60.7832	1.12298	0.00725379	0.0980294	-	5	25980056	25981153	+	432	lncRNA	-	-
AT5G09830	819.473	924.354	326.437	475.352	871.913	400.894	1.12073	5.39e-05	0.00321674	BOLA2	5	3057603	3058825	-	551	protein_coding	-	-
AT5G05960	1661.71	1863.89	1011.11	610.724	1762.8	810.915	1.12039	0.000113008	0.00571741	-	5	1789538	1790833	+	1208	protein_coding	PF14368:Probable lipid transfer	-
AT1G53030	371.798	263.83	128.243	164.306	317.814	146.275	1.11923	0.00101695	0.0264875	COX17-2	1	19760001	19761496	-	574	protein_coding	-	-
AT2G15830	254.188	188.857	101.747	102.304	221.522	102.025	1.11852	0.00152474	0.034788	-	2	6893949	6894685	+	737	protein_coding	-	-
AT3G29170	526.397	497.291	190.775	281.078	511.844	235.926	1.11702	0.000188404	0.00852852	-	3	11135951	11138010	-	978	protein_coding	PF05915:Eukaryotic protein of unknown function (DUF872)	-
AT4G14305	71.1348	117.68	55.1127	32.0346	94.4072	43.5737	1.11621	0.0408041	0.273608	-	4	8235093	8236744	-	939	protein_coding	PF04117:Mpv17 / PMP22 family	Mpv17_PMP22
AT5G16950	265.57	277.116	91.148	159.139	271.343	125.144	1.11594	0.0030211	0.0551796	-	5	5572523	5573191	+	669	protein_coding	-	-
AT3G45960	123.3	112.934	64.6515	44.4351	118.117	54.5433	1.1154	0.0120438	0.133226	EXLA3	3	16892702	16894153	+	1368	protein_coding	PF01357:Pollen allergen|PF03330:Lytic transglycolase	-
AT5G48540	739.802	522.915	169.578	413.349	631.358	291.464	1.11483	0.00859034	0.109293	CRRSP55	5	19668964	19669920	-	957	protein_coding	PF01657:Salt stress response/antifungal	-
AT5G63595	177.363	190.755	107.046	63.0358	184.059	85.0408	1.11463	0.00634401	0.0899647	FLS4	5	25459087	25460436	-	1009	protein_coding	PF03171:2OG-Fe(II) oxygenase superfamily|PF14226:non-haem dioxygenase in morphine synthesis N-terminal	2OG-FeII_Oxy
AT1G58420	239.013	282.81	90.0881	150.873	260.912	120.48	1.1142	0.00319147	0.0575695	-	1	21707175	21708125	+	951	protein_coding	-	-
AT1G30110	2382.54	1849.66	872.265	1082.98	2116.1	977.62	1.11399	4.81e-06	0.00051726	NUDT25	1	10581735	10584152	+	1085	protein_coding	PF00293:NUDIX domain	NUDIX
AT1G74270	3418.26	3595.87	1081.06	2165.95	3507.07	1623.5	1.11108	0.000681857	0.0206274	RPL35AC	1	27928171	27929537	-	654	protein_coding	PF01247:Ribosomal protein L35Ae	-
AT3G09940	1014.86	875.004	654.994	220.109	944.93	437.551	1.11098	0.0124192	0.136296	MDAR3	3	3056375	3059244	-	1593	protein_coding	PF07992:Pyridine nucleotide-disulphide oxidoreductase	Pyr_redox_2
AT2G28630	1110.65	1259.36	453.62	645.858	1185.01	549.739	1.10789	2.69e-05	0.00194492	KCS12	2	12274468	12277417	-	2455	protein_coding	PF08541:3-Oxoacyl-[acyl-carrier-protein (ACP)] synthase III C terminal|PF08392:FAE1/Type III polyketide synthase-like protein	-
AT4G02090	227.631	160.386	103.866	76.4696	194.009	90.168	1.10585	0.00503718	0.0770481	-	4	923122	923893	+	772	protein_coding	PF14009:Domain of unknown function (DUF4228)	-
AT5G42785	123.3	100.597	75.2501	28.9345	111.949	52.0923	1.10474	0.0483969	0.299474	-	5	17156853	17157857	-	728	protein_coding	-	-
AT5G44920	97.6918	93.0048	45.574	43.4017	95.3483	44.4878	1.09989	0.0160532	0.161084	TIK	5	18138775	18140190	+	1154	protein_coding	PF01582:TIR domain	TIR
AT1G66725	163.136	163.233	104.926	47.5352	163.184	76.2307	1.0989	0.0202342	0.186119	MIR163	1	24884066	24884396	+	331	miRNA	-	-
AT4G24110	290.23	286.607	109.166	160.173	288.418	134.669	1.09827	0.00108683	0.0276709	-	4	12519907	12520898	-	992	protein_coding	-	-
AT4G13615	5363.56	5300.32	2072.03	2912.05	5331.94	2492.04	1.09729	3.02e-06	0.000354637	-	4	7924135	7925396	+	813	protein_coding	-	-
AT3G55970	420.169	693.74	171.697	349.28	556.955	260.489	1.09603	0.00753796	0.100501	JRG21	3	20766735	20769410	-	2172	protein_coding	PF03171:2OG-Fe(II) oxygenase superfamily|PF14226:non-haem dioxygenase in morphine synthesis N-terminal	2OG-FeII_Oxy
AT2G36590	388.87	682.351	218.331	283.144	535.611	250.738	1.09484	0.00196191	0.0413866	PROT3	2	15343006	15345673	-	1996	protein_coding	PF01490:Transmembrane amino acid transporter protein	Aa_trans
AT1G51420	423.963	395.745	266.025	118.838	409.854	192.431	1.09124	0.00718302	0.0974698	ATSPP1	1	19064598	19066989	-	1811	protein_coding	PF08472:Sucrose-6-phosphate phosphohydrolase C-terminal|PF05116:Sucrose-6F-phosphate phosphohydrolase	-
AT2G43510	2046.78	2757.88	875.445	1380.59	2402.33	1128.02	1.09056	0.000201988	0.008903	ATTI1	2	18066960	18067860	+	761	protein_coding	-	-
AT5G48070	885.865	729.803	454.68	304.845	807.834	379.763	1.0892	0.000189198	0.00852852	XTH20	5	19481897	19483527	+	1406	protein_coding	PF06955:Xyloglucan endo-transglycosylase (XET) C-terminus|PF00722:Glycosyl hydrolases family 16	-
AT5G53110	487.51	493.495	213.032	248.01	490.503	230.521	1.08918	3.14e-05	0.00214409	-	5	21528950	21533159	+	1372	protein_coding	PF13947:Wall-associated receptor kinase galacturonan-binding|PF13639:Ring finger domain	-
AT5G45070	722.729	831.349	475.877	255.243	777.039	365.56	1.08816	0.00132427	0.0316276	PP2A8	5	18187630	18189523	-	1495	protein_coding	PF14299:Phloem protein 2|PF01582:TIR domain	TIR
AT3G47340	469.489	442.247	306.3	122.971	455.868	214.636	1.08716	0.0106522	0.12458	ASN1	3	17437840	17441431	-	2746	protein_coding	PF00733:Asparagine synthase|PF13537:Glutamine amidotransferase domain	-
AT3G15450	412.582	512.475	191.835	243.876	462.529	217.855	1.08592	0.00020965	0.00907004	-	3	5212984	5214124	+	1051	protein_coding	PF12481:Aluminium induced protein	-
AT1G76705	140.373	149.946	54.0529	82.6699	145.16	68.3614	1.08572	0.00952477	0.11674	-	1	28786290	28787328	+	811	protein_coding	-	-
AT4G00955	239.961	216.378	89.0283	126.072	228.17	107.55	1.08462	0.00223324	0.0450174	-	4	412107	413810	+	1551	protein_coding	-	-
AT2G05518	84.4133	86.3616	38.155	42.3683	85.3874	40.2616	1.08441	0.0235653	0.204333	-	2	2023295	2023995	+	511	ncRNA	-	-
AT2G32690	6882.05	8383.72	3061.94	4138.66	7632.88	3600.3	1.08408	5.37e-06	0.000556558	GRP23	2	13863635	13864710	-	1076	protein_coding	-	-
AT4G02380	15014.2	11522.2	2835.13	9698.21	13268.2	6266.67	1.08218	0.0174141	0.169574	SAG21	4	1046042	1047105	-	968	protein_coding	PF03242:Late embryogenesis abundant protein	-
AT3G25790	199.177	192.653	133.542	51.6687	195.915	92.6055	1.08183	0.0271856	0.223134	HHO1	3	9413052	9415240	+	1651	protein_coding	PF00249:Myb-like DNA-binding domain	Myb_DNA-binding
AT4G37520	2042.99	2291.9	1127.69	920.736	2167.45	1024.21	1.08156	9.13e-07	0.000133954	PER50	4	17631500	17633249	+	1383	protein_coding	PF00141:Peroxidase	-
AT1G48140	622.192	664.32	258.606	349.28	643.256	303.943	1.08133	6.41e-05	0.00374789	DPMS3	1	17781988	17784211	+	743	protein_coding	-	-
AT1G47760	63.5471	69.2791	31.7958	31.0012	66.4131	31.3985	1.08082	0.0428546	0.281019	AGL102	1	17572414	17573373	+	806	protein_coding	PF00319:SRF-type transcription factor (DNA-binding and dimerisation domain)	SRF-TF
AT5G67620	336.705	329.313	199.254	115.738	333.009	157.496	1.08076	0.00246936	0.0482068	-	5	26964551	26966010	-	1179	protein_coding	PF14009:Domain of unknown function (DUF4228)	-
AT4G36040	1012.96	978.448	413.346	529.087	995.704	471.216	1.07915	8.15e-06	0.000777023	ATJ11	4	17049152	17050608	-	1457	protein_coding	PF00226:DnaJ domain	DnaJ
AT4G03540	345.241	313.179	198.194	113.671	329.21	155.932	1.0786	0.00293496	0.0540142	-	4	1569937	1571737	+	854	protein_coding	PF04535:Domain of unknown function (DUF588)	-
AT4G37940	147.012	172.723	108.106	43.4017	159.868	75.7537	1.07834	0.0327558	0.243847	AGL21	4	17835217	17838969	-	2266	protein_coding	PF01486:K-box region|PF00319:SRF-type transcription factor (DNA-binding and dimerisation domain)	K-box
AT1G60110	147.012	117.68	52.993	72.3361	132.346	62.6646	1.07808	0.01154	0.12969	-	1	22168424	22170803	+	2029	protein_coding	PF01419:Jacalin-like lectin domain	-
AT1G13100	376.54	413.776	175.937	198.408	395.158	187.172	1.0779	0.000101209	0.00532649	CYP71B29	1	4463859	4465725	+	1784	protein_coding	PF00067:Cytochrome P450	p450
AT4G27310	257.034	233.461	73.1304	159.139	245.247	116.135	1.07778	0.0128594	0.139305	-	4	13675537	13677055	+	1427	protein_coding	PF00643:B-box zinc finger	zf-B_box
AT3G21710	455.263	467.871	286.162	152.939	461.567	219.551	1.07241	0.00264041	0.0506265	VUP1	3	7648316	7649894	+	1348	protein_coding	-	-
AT5G38710	303.508	325.517	188.655	110.571	314.513	149.613	1.0724	0.0028963	0.0536271	POX2	5	15501126	15504269	+	2067	protein_coding	PF01619:Proline dehydrogenase	-
AT3G17717	179.26	171.774	60.412	106.437	175.517	83.4247	1.07234	0.0104564	0.123208	-	3	6061180	6061762	+	384	protein_coding	PF01536:Adenosylmethionine decarboxylase	SAM_decarbox
AT5G41010	1390.45	1467.2	456.8	903.168	1428.82	679.984	1.07108	0.00137744	0.0324048	NRPB12	5	16423919	16425324	+	690	protein_coding	-	-
AT1G11475	1618.08	1749.06	781.117	821.532	1683.57	801.324	1.07103	1.33e-07	2.82e-05	NRPB10	1	3862399	3864074	+	606	protein_coding	-	-
AT1G06283	236.167	273.32	112.345	130.205	254.744	121.275	1.07054	0.000901272	0.0245386	-	1	10309265	10309404	+	140	snoRNA	-	-
AT1G72690	148.909	168.927	58.2923	93.0036	158.918	75.648	1.07024	0.0100426	0.120713	-	1	27361146	27361958	+	554	protein_coding	-	-
AT5G40780	5482.12	4381.66	1771.03	2934.78	4931.89	2352.9	1.06765	0.000219536	0.00934022	LHT1	5	16323567	16327382	+	2287	protein_coding	PF01490:Transmembrane amino acid transporter protein	Aa_trans
AT4G14365	1259.56	813.317	339.155	649.992	1036.44	494.574	1.06719	0.00377019	0.0637649	XBAT34	4	8271270	8273903	-	1739	protein_coding	PF12796:Ankyrin repeats (3 copies)|PF13920:Zinc finger, C3HC4 type (RING finger)	-
AT5G66490	317.735	368.223	162.159	165.34	342.979	163.749	1.0666	0.0002217	0.0094119	-	5	26547227	26547793	-	567	protein_coding	-	-
AT2G41170	1085.99	1415	567.025	628.291	1250.5	597.658	1.06505	1.25e-05	0.00106861	-	2	17159074	17161294	-	2019	protein_coding	PF00646:F-box domain	F-box
AT4G23700	130.888	167.978	50.8733	91.9702	149.433	71.4218	1.06431	0.0190974	0.179603	CHX17	4	12342376	12346051	-	2817	protein_coding	PF00999:Sodium/hydrogen exchanger family	Na_H_Exchanger
AT1G01725	116.661	79.7184	38.155	55.8022	98.1897	46.9786	1.06297	0.0333675	0.245891	-	1	269792	270859	-	537	protein_coding	-	-
AT3G52790	254.188	308.434	154.74	114.704	281.311	134.722	1.06255	0.00149068	0.0343175	-	3	19565790	19566492	-	703	protein_coding	-	-
AT5G23950	126.146	94.9028	61.4719	44.4351	110.524	52.9535	1.06211	0.0215159	0.192278	-	5	8082650	8083772	+	1123	protein_coding	PF00168:C2 domain	C2
AT3G12977	181.157	233.461	142.021	56.8355	207.309	99.4284	1.06075	0.0291531	0.230428	-	3	4143524	4146037	+	1336	protein_coding	PF02365:No apical meristem (NAM) protein	NAM
novel.134	137.527	123.374	89.0283	36.1681	130.45	62.5982	1.06026	0.0427279	0.280777	-	3	20872596	20874042	+	1281	-	-	-
AT3G62780	71.1348	74.9732	33.9155	36.1681	73.054	35.0418	1.05975	0.0377687	0.263706	-	3	23221719	23222995	-	1277	protein_coding	PF00168:C2 domain	C2
AT4G01060	110.022	111.985	42.3944	64.0691	111.004	53.2318	1.05955	0.0199739	0.184389	ETC3	4	460395	461246	+	652	protein_coding	-	-
AT3G10860	4918.73	4500.29	1507.12	3021.58	4709.51	2264.35	1.05642	0.00120213	0.0298445	-	3	3399550	3400926	+	840	protein_coding	-	-
AT2G41880	699.018	502.036	242.708	334.813	600.527	288.761	1.05613	0.000624649	0.0195934	GK-1	2	17474527	17477311	+	2071	protein_coding	PF00625:Guanylate kinase	-
AT2G35270	180.208	234.41	131.423	68.2026	207.309	99.8127	1.05514	0.0146365	0.151868	AHL21	2	14856664	14858134	+	1471	protein_coding	PF03479:Domain of unknown function (DUF296)	-
AT3G04640	210.559	215.429	104.926	100.237	212.994	102.582	1.05412	0.00141042	0.0329528	-	3	1260906	1261683	-	778	protein_coding	-	-
AT3G15352	425.86	409.98	145.201	257.31	417.92	201.255	1.05376	0.00255323	0.0493254	ATCOX17	3	5179358	5180665	+	1308	protein_coding	-	-
AT5G22300	507.428	313.179	118.704	276.944	410.304	197.824	1.05208	0.0190515	0.17936	NIT4	5	7379187	7382025	+	2446	protein_coding	PF00795:Carbon-nitrogen hydrolase	CN_hydrolase
AT5G53650	620.295	708.924	229.99	411.283	664.61	320.636	1.05126	0.00163744	0.0367686	-	5	21791155	21792556	+	643	protein_coding	-	-
AT4G02830	220.992	172.723	127.183	63.0358	196.858	95.1095	1.05018	0.0182302	0.174525	-	4	1262245	1264101	+	1054	protein_coding	-	-
AT5G26010	334.808	357.784	197.134	137.439	346.296	167.286	1.05009	0.000956042	0.0253633	-	5	9085247	9087585	-	1474	protein_coding	PF00481:Protein phosphatase 2C	PP2C
AT1G30720	711.348	846.533	352.934	399.915	778.941	376.425	1.04904	2e-05	0.0015588	-	1	10897925	10899975	+	2051	protein_coding	PF08031:Berberine and berberine like|PF01565:FAD binding domain	FAD_binding_4
AT1G51840	210.559	288.505	96.4473	144.672	249.532	120.56	1.04902	0.00527747	0.0803024	-	1	19249401	19250863	-	1364	protein_coding	PF12819:Carbohydrate-binding protein of the ER	-
AT2G25260	355.674	305.587	222.571	97.1371	330.631	159.854	1.04899	0.013845	0.146103	HPAT2	2	10755524	10757947	-	1351	protein_coding	-	-
AT2G23090	5582.66	5458.81	2057.19	3279.93	5520.73	2668.56	1.04875	8.2e-05	0.00463787	-	2	9829450	9830434	-	604	protein_coding	-	-
AT1G09787	69.2378	106.291	46.6339	38.2348	87.7645	42.4343	1.04873	0.0399405	0.271498	-	1	29422295	29422360	+	66	snoRNA	-	-
AT4G12500	1351.56	1238.48	582.923	669.626	1295.02	626.275	1.04802	1.72e-06	0.000220332	-	4	7413990	7414955	-	966	protein_coding	PF14547:Hydrophobic seed protein	-
AT4G11211	347.138	448.89	235.289	149.839	398.014	192.564	1.04786	0.00217138	0.0439877	-	4	6836106	6836588	+	483	protein_coding	-	-
AT1G76860	2274.42	2644.94	1131.93	1251.42	2459.68	1191.67	1.04544	5.22e-07	8.53e-05	LSM3B	1	28854414	28855750	-	590	protein_coding	-	-
AT2G01340	246.601	245.798	125.064	113.671	246.199	119.367	1.04457	0.000916184	0.024714	At17.1	2	163954	165290	+	930	protein_coding	PF14009:Domain of unknown function (DUF4228)	-
AT1G49570	177.363	180.315	120.824	52.702	178.839	86.7631	1.04429	0.0265937	0.220391	PER10	1	18346958	18349049	+	1509	protein_coding	PF00141:Peroxidase	-
AT1G61255	564.336	721.262	216.212	407.149	642.799	311.68	1.04399	0.00333105	0.0589577	-	1	22589098	22589789	-	692	protein_coding	-	-
AT4G24310	129.94	125.272	81.6093	42.3683	127.606	61.9888	1.04248	0.0279632	0.225517	DMP3	4	12600803	12601726	+	924	protein_coding	PF05078:Protein of unknown function (DUF679)	-
AT3G27650	260.827	266.677	163.219	93.0036	263.752	128.111	1.04236	0.0058285	0.0852892	LBD25	3	10238514	10240648	+	999	protein_coding	PF03195:Lateral organ boundaries (LOB) domain	-
AT1G27330	4664.54	4026.73	1978.76	2245.52	4345.64	2112.14	1.04083	3.24e-07	5.46e-05	-	1	9492849	9494382	+	906	protein_coding	-	-
AT2G47485	492.253	917.711	216.212	469.151	704.982	342.682	1.04049	0.0159653	0.160393	-	2	19485809	19486833	+	1025	protein_coding	-	-
novel.37	194.435	172.723	119.764	58.9023	183.579	89.3333	1.03987	0.0193687	0.181108	-	1	1480043	1480897	-	667	-	-	-
AT1G02400	857.411	1175.85	505.553	484.652	1016.63	495.103	1.03802	5.55e-05	0.00330343	GA2OX6	1	486800	489651	+	1497	protein_coding	PF03171:2OG-Fe(II) oxygenase superfamily|PF14226:non-haem dioxygenase in morphine synthesis N-terminal	2OG-FeII_Oxy
AT3G51940	165.033	187.908	75.2501	97.1371	176.47	86.1936	1.03337	0.00546312	0.0822691	-	3	19273339	19275338	-	1924	protein_coding	-	-
AT3G28930	3465.69	1920.83	1212.48	1426.06	2693.26	1319.27	1.02959	0.000886416	0.0242961	AIG2A	3	10959641	10961461	-	1171	protein_coding	PF06094:Gamma-glutamyl cyclotransferase, AIG2-like	-
AT4G24130	2153.96	2258.69	1129.81	1032.34	2206.32	1081.08	1.02922	1.94e-07	3.56e-05	-	4	12527675	12528686	+	923	protein_coding	PF04398:Protein of unknown function, DUF538	-
AT1G35260	546.315	581.754	334.916	218.042	564.035	276.479	1.02894	0.000667696	0.0203195	MLP165	1	12936849	12937787	-	767	protein_coding	PF00407:Pathogenesis-related protein Bet v I family	-
AT5G19151	83.4648	78.7694	41.3346	38.2348	81.1171	39.7847	1.02795	0.0344104	0.249968	-	5	6428530	6429708	+	428	protein_coding	-	-
AT1G61560	339.55	340.701	160.039	173.607	340.126	166.823	1.02763	0.000274954	0.010818	MLO6	1	22708468	22712289	-	2856	protein_coding	PF03094:Mlo family	-
AT5G01350	2536.19	2684.8	1171.15	1389.89	2610.5	1280.52	1.02754	6.7e-07	0.000103642	-	5	145387	147356	-	952	protein_coding	-	-
AT5G67450	263.673	207.837	127.183	104.371	235.755	115.777	1.02622	0.00283268	0.0529215	AZF1	5	26918765	26920179	-	1415	protein_coding	PF13912:C2H2-type zinc finger	-
AT4G08230	957.948	800.031	425.004	438.15	878.99	431.577	1.0262	1.36e-05	0.00113134	-	4	5187785	5189794	-	824	protein_coding	PF10961:Selenoprotein SelK_SelG	-
AT2G45695	561.49	579.856	246.947	314.145	570.673	280.546	1.02419	0.000104534	0.00545929	URM1-1	2	18825954	18826899	+	550	protein_coding	PF09138:Urm1 (Ubiquitin related modifier)	-
AT1G64000	140.373	124.323	86.9086	43.4017	132.348	65.1551	1.02324	0.0325189	0.243058	WRKY56	1	23747304	23749053	+	888	protein_coding	PF03106:WRKY DNA -binding domain	WRKY
AT1G05205	364.21	374.866	161.099	202.541	369.538	181.82	1.02293	0.000421448	0.0147362	-	1	1509103	1510341	-	617	protein_coding	-	-
AT2G43460	8360.71	8048.71	3356.58	4729.75	8204.71	4043.16	1.02094	1.28e-05	0.00108534	RPL38A	2	18045965	18047401	-	639	protein_coding	-	-
novel.95	220.044	264.779	178.057	60.969	242.411	119.513	1.02092	0.0426387	0.28034	-	2	9022787	9024417	-	1074	-	PF00230:Major intrinsic protein	-
AT3G14060	315.838	295.148	104.926	196.341	305.493	150.634	1.01956	0.00751103	0.100245	-	3	4656782	4657723	-	942	protein_coding	-	-
AT1G17455	445.778	478.31	219.391	236.642	462.044	228.017	1.0188	8.98e-05	0.00490192	EFL4	1	5997057	5998599	+	1057	protein_coding	PF07011:Protein of unknown function (DUF1313)	-
AT5G41761	74.9286	79.7184	36.0353	40.3016	77.3235	38.1684	1.0183	0.0403307	0.27264	-	5	16711042	16712069	+	1028	protein_coding	-	-
AT3G24420	3142.26	3875.83	1366.16	2099.81	3509.05	1732.99	1.01775	0.00018802	0.00852852	-	3	8862813	8865239	-	1476	protein_coding	PF00561:alpha/beta hydrolase fold	Abhydrolase_1
AT2G36090	506.48	571.315	331.736	201.508	538.897	266.622	1.01556	0.00163856	0.0367686	-	2	15158561	15159639	+	1079	protein_coding	-	-
AT5G38350	126.146	115.781	77.3698	42.3683	120.964	59.8691	1.01552	0.0314703	0.239071	-	5	15328569	15331528	+	2592	protein_coding	PF00931:NB-ARC domain	NB-ARC
AT3G01290	2754.34	2217.88	802.314	1657.53	2486.11	1229.92	1.01523	0.00330402	0.0586524	HIR3	3	87684	89593	-	1663	protein_coding	PF01145:SPFH domain / Band 7 family	-
AT1G02930	19955.7	11756.6	5734.9	9971.02	15856.1	7852.96	1.01372	0.00280568	0.0526404	GSTF6	1	661088	662475	-	1186	protein_coding	PF00043:Glutathione S-transferase, C-terminal domain|PF02798:Glutathione S-transferase, N-terminal domain	GST_N
AT5G14360	116.661	110.087	72.0705	40.3016	113.374	56.186	1.01365	0.0336013	0.246723	-	5	4630892	4631851	+	848	protein_coding	PF00240:Ubiquitin family	ubiquitin
novel.154	275.054	275.218	124.004	148.806	275.136	136.405	1.01199	0.00107225	0.0273691	-	3	11758239	11761120	-	1755	-	PF00472:RF-1 domain	-
AT4G09320	23191.8	24322.7	9148.72	14417.6	23757.2	11783.2	1.01163	9.81e-05	0.00517575	NDK1	4	5923484	5924366	+	450	protein_coding	PF00334:Nucleoside diphosphate kinase	NDK
AT5G60400	781.534	952.825	362.472	499.119	867.179	430.796	1.00913	0.000223907	0.00943942	-	5	24290993	24292336	-	1344	protein_coding	-	-
AT3G53830	182.105	186.01	80.5494	102.304	184.057	91.4267	1.00909	0.00500939	0.0768533	-	3	19940499	19943885	+	2172	protein_coding	PF00415:Regulator of chromosome condensation (RCC1) repeat	-
AT3G44860	365.158	524.813	207.733	234.576	444.986	221.154	1.00859	0.00105045	0.0269137	FAMT	3	16379571	16381434	+	1660	protein_coding	PF03492:SAM dependent carboxyl methyltransferase	-
AT3G55150	295.921	288.505	173.817	116.771	292.213	145.294	1.0085	0.00269166	0.0512464	ATEXO70H1	3	20440491	20442650	-	2160	protein_coding	PF03081:Exo70 exocyst complex subunit	Exo70
AT3G54420	794.813	892.087	352.934	485.685	843.45	419.309	1.00808	0.000147847	0.00702103	EP3	3	20145905	20148266	+	2084	protein_coding	PF05142:Domain of unknown function (DUF702)	-
AT2G43620	12298.7	7666.25	3430.77	6498.88	9982.49	4964.83	1.00764	0.00373704	0.0635391	-	2	18093694	18095093	-	1180	protein_coding	PF00187:Chitin recognition protein|PF00182:Chitinase class I	-
AT1G68360	103.383	92.0558	43.4543	53.7354	97.7191	48.5948	1.00745	0.0274064	0.224124	GIS3	1	25621533	25622593	-	1061	protein_coding	-	-
AT4G26200	683.842	358.733	179.116	339.98	521.288	259.548	1.00582	0.0174885	0.169893	ACS7	4	13275200	13277188	+	1693	protein_coding	PF00155:Aminotransferase class I and II	Aminotran_1_2
AT5G08040	1467.27	1413.1	509.793	924.869	1440.19	717.331	1.00538	0.00131085	0.0314174	TOM5	5	2577006	2578310	-	754	protein_coding	-	-
AT2G28160	406.891	416.623	298.881	111.604	411.757	205.242	1.0049	0.0244521	0.209005	FIT	2	12004658	12006276	+	1380	protein_coding	PF00010:Helix-loop-helix DNA-binding domain	HLH
AT3G15356	1670.24	648.186	565.965	590.056	1159.22	578.011	1.00397	0.0134181	0.143412	LEC	3	5174402	5175523	-	1122	protein_coding	PF00139:Legume lectin domain	-
AT3G07910	1536.51	1520.34	498.134	1026.14	1528.43	762.137	1.00377	0.00343229	0.0600062	-	3	2522918	2524168	-	794	protein_coding	-	-
AT1G02900	1508.06	1723.44	1143.59	468.118	1615.75	805.854	1.00375	0.00939353	0.115893	RALF1	1	653604	654457	-	854	protein_coding	PF05498:Rapid ALkalinization Factor (RALF)	-
AT4G29050	155.548	116.731	56.1726	79.5697	136.139	67.8712	1.0037	0.0199228	0.184206	-	4	14314657	14317022	-	2366	protein_coding	PF00139:Legume lectin domain|PF00069:Protein kinase domain	Pkinase
AT2G40095	391.715	279.014	154.74	179.807	335.365	167.273	1.00336	0.0019753	0.041626	-	2	16742896	16745152	+	2076	protein_coding	-	-
AT5G19230	1301.29	1044.88	762.04	410.249	1173.09	586.144	1.00116	0.00260261	0.0500437	-	5	6467193	6468848	+	1384	protein_coding	-	-
AT2G37530	101.486	89.2087	51.9332	43.4017	95.3471	47.6674	1.00052	0.0294098	0.231158	-	2	15750915	15751672	+	758	protein_coding	-	-
AT2G31090	429.654	411.878	207.733	212.875	420.766	210.304	1.00051	0.000144504	0.00691047	-	2	13256091	13257068	+	892	protein_coding	-	-
AT1G73810	283.591	260.983	142.021	130.205	272.287	136.113	1.00045	0.0010473	0.0269137	-	1	27752342	27755297	-	1510	protein_coding	PF02485:Core-2/I-Branching enzyme	-
AT5G60600	5115.06	4478.47	7972.27	11220.4	4796.76	9596.32	-1.00043	2.85e-05	0.0020258	ISPG	5	24358885	24363485	+	3084	protein_coding	PF04551:GcpE protein	-
AT5G62940	50.2686	60.7378	81.6093	140.539	55.5032	111.074	-1.0013	0.0390648	0.267749	DOF5.6	5	25256852	25258704	-	1650	protein_coding	PF02701:Dof domain, zinc finger	zf-Dof
AT5G22090	1872.27	1449.17	3162.62	3497.97	1660.72	3330.3	-1.00386	7e-06	0.000693486	-	5	7314583	7321743	-	2266	protein_coding	PF11250:Fantastic Four meristem regulator	-
AT5G09660	3263.66	2580.41	4085.76	7675.9	2922.04	5880.83	-1.00907	0.00154884	0.0351415	PMDH2	5	2993411	2995784	-	1924	protein_coding	PF02866:lactate/malate dehydrogenase, alpha/beta C-terminal domain|PF00056:lactate/malate dehydrogenase, NAD binding domain	-
AT4G19130	66.3925	67.381	151.56	117.805	66.8867	134.682	-1.00953	0.0126932	0.138459	-	4	10466407	10469329	-	2803	protein_coding	PF04057:Replication factor-A protein 1, N-terminal domain|PF16900:Replication protein A OB domain|PF08646:Replication factor-A C terminal domain|PF01336:OB-fold nucleic acid binding domain	tRNA_anti
AT2G29290	165.981	129.068	210.912	384.415	147.525	297.664	-1.01298	0.0101691	0.121643	-	2	12585856	12588174	+	1833	protein_coding	PF13561:Enoyl-(Acyl carrier protein) reductase	-
AT3G01440	211.507	204.041	364.592	475.352	207.774	419.972	-1.01543	0.000433196	0.0149423	PNSL3	3	168408	169662	+	988	protein_coding	PF05757:Oxygen evolving enhancer protein 3 (PsbQ)	-
AT4G09500	335.756	296.097	656.054	622.091	315.927	639.072	-1.01636	2.86e-05	0.0020258	UGT79B7	4	6018021	6019759	+	1739	protein_coding	PF00201:UDP-glucoronosyl and UDP-glucosyl transferase	UDPGT
AT4G15440	128.043	84.4635	169.578	260.41	106.253	214.994	-1.01702	0.0125933	0.137693	CYP74B2	4	8835368	8838676	+	1870	protein_coding	PF00067:Cytochrome P450	p450
AT1G70820	892.504	840.839	1440.35	2078.11	866.672	1759.23	-1.02145	6.49e-05	0.00378523	-	1	26705420	26708265	+	2355	protein_coding	PF02879:Phosphoglucomutase/phosphomannomutase, alpha/beta/alpha domain II|PF02878:Phosphoglucomutase/phosphomannomutase, alpha/beta/alpha domain I|PF02880:Phosphoglucomutase/phosphomannomutase, alpha/beta/alpha domain III	PGM_PMM_II
AT2G21560	74.9286	79.7184	210.912	103.337	77.3235	157.125	-1.02253	0.0293856	0.231056	-	2	9230208	9231580	-	1373	protein_coding	-	-
AT5G20630	9499.81	8662.73	16060.1	20839	9081.27	18449.5	-1.02262	2.02e-06	0.000248248	GER3	5	6975029	6976036	-	1008	protein_coding	PF00190:Cupin	-
AT2G23170	70.1863	66.432	152.62	125.038	68.3092	138.829	-1.02297	0.00980072	0.118913	GH3.3	2	9863855	9866562	-	2118	protein_coding	PF03321:GH3 auxin-responsive promoter	-
AT5G02830	411.633	435.604	735.543	986.872	423.619	861.207	-1.0237	7.4e-05	0.00422193	-	5	644279	648538	-	2855	protein_coding	PF13041:PPR repeat family	-
AT3G26650	9839.36	7881.68	12363.3	23683.9	8860.52	18023.6	-1.02443	0.00130823	0.0313913	GAPA1	3	9794862	9797045	+	1752	protein_coding	PF02800:Glyceraldehyde 3-phosphate dehydrogenase, C-terminal domain|PF00044:Glyceraldehyde 3-phosphate dehydrogenase, NAD binding domain	-
AT1G42970	15003.7	11514.6	18166	35839.5	13259.2	27002.7	-1.02612	0.00180625	0.0390716	GAPB	1	16127353	16129895	+	1854	protein_coding	PF02800:Glyceraldehyde 3-phosphate dehydrogenase, C-terminal domain|PF00044:Glyceraldehyde 3-phosphate dehydrogenase, NAD binding domain	-
AT3G20680	177.363	166.08	370.951	329.646	171.721	350.299	-1.02843	0.000290578	0.0111955	-	3	7230068	7231194	-	1127	protein_coding	PF09353:Domain of unknown function (DUF1995)	-
AT1G52000	269.364	254.34	615.779	452.618	261.852	534.198	-1.02848	0.000275495	0.0108185	JAL5	1	19333088	19336135	-	2717	protein_coding	PF01419:Jacalin-like lectin domain	-
AT2G29090	121.403	99.648	135.662	315.179	110.526	225.421	-1.02856	0.0277064	0.225135	CYP707A2	2	12494826	12499723	-	2330	protein_coding	PF00067:Cytochrome P450	p450
AT4G24260	54.0624	46.5024	104.926	100.237	50.2824	102.582	-1.02859	0.0197978	0.183593	KOR3	4	12577630	12580415	-	2536	protein_coding	PF00759:Glycosyl hydrolase family 9	-
AT5G55520	129.94	160.386	390.029	202.541	145.163	296.285	-1.02905	0.0108259	0.126115	-	5	22488054	22491300	-	2682	protein_coding	-	-
AT3G62680	892.504	832.298	2769.42	752.296	862.401	1760.86	-1.02979	0.0320061	0.24099	PRP3	3	23182722	23184042	+	1221	protein_coding	PF01190:Pollen proteins Ole e I like	-
AT5G42270	4514.69	3987.82	7098.95	10262.4	4251.25	8680.69	-1.02994	2.63e-05	0.00191467	FTSH5	5	16902475	16905294	+	2491	protein_coding	PF01434:Peptidase family M41|PF00004:ATPase family associated with various cellular activities (AAA)	AAA
AT5G02600	187.796	198.347	343.395	446.417	193.071	394.906	-1.03253	0.000428257	0.0148939	NAKR1	5	584162	586953	-	2264	protein_coding	PF00403:Heavy-metal-associated domain	HMA
AT3G48740	1088.84	1009.77	1936.37	2358.16	1049.3	2147.26	-1.03311	1.77e-06	0.00022608	SWEET11	3	18052466	18054832	-	1387	protein_coding	PF03083:Sugar efflux transporter for intercellular exchange	-
AT4G32980	476.129	584.602	1035.48	1137.74	530.365	1086.61	-1.03482	1.03e-05	0.000929987	ATH1	4	15914670	15918153	-	2580	protein_coding	PF05920:Homeobox KN domain|PF07526:Associated with HOX	POX
AT1G65230	279.797	235.359	517.212	538.388	257.578	527.8	-1.035	6.33e-05	0.00371233	-	1	24229063	24230902	+	1103	protein_coding	PF10184:Uncharacterized conserved protein (DUF2358)	-
AT3G26570	1235.85	1250.82	2447.22	2650.6	1243.33	2548.91	-1.03568	7.81e-08	1.79e-05	PHT2;1	3	9756007	9758701	+	2461	protein_coding	PF01384:Phosphate transporter family	-
AT1G52770	138.476	86.3616	209.852	251.11	112.419	230.481	-1.03587	0.00630816	0.08964	-	1	19655831	19657795	+	1792	protein_coding	PF03000:NPH3 family	-
AT3G01670	289.281	224.92	532.05	522.887	257.101	527.468	-1.03674	0.000122895	0.00612075	-	3	247192	250472	+	2776	protein_coding	PF14577:Sieve element occlusion C-terminus|PF14576:Sieve element occlusion N-terminus	-
AT1G50250	1326.9	1096.13	1821.9	3151.79	1211.51	2486.84	-1.03755	0.000605319	0.0191638	FTSH1	1	18614201	18617155	-	2573	protein_coding	PF01434:Peptidase family M41|PF00004:ATPase family associated with various cellular activities (AAA)	AAA
AT2G47440	657.285	712.72	1486.98	1326.85	685.003	1406.92	-1.03832	1.1e-06	0.000157693	-	2	19469571	19472006	+	2352	protein_coding	-	-
AT1G31880	52.1655	34.165	78.4297	99.2038	43.1653	88.8168	-1.04116	0.0389915	0.267622	NLM9	1	11445490	11450232	+	1653	protein_coding	PF13713:Transcription factor BRX N-terminal domain|PF08381:Transcription factor regulating root and shoot growth via Pin3	-
AT5G20970	59.7532	53.1456	121.884	110.571	56.4494	116.227	-1.04182	0.0131673	0.14137	-	5	7122800	7124001	+	1082	protein_coding	PF00011:Hsp20/alpha crystallin family	-
AT1G45616	108.125	119.578	197.134	271.777	113.851	234.456	-1.0424	0.00286214	0.0532285	AtRLP6	1	17183347	17186602	-	3256	protein_coding	PF13855:Leucine rich repeat	-
AT4G34830	1334.49	1045.83	1845.22	3066.02	1190.16	2455.62	-1.04498	0.000462106	0.0156488	MRL1	4	16599597	16606135	-	3790	protein_coding	PF17177:Pentacotripeptide-repeat region of PRORP|PF12854:PPR repeat|PF13041:PPR repeat family	-
AT5G24155	54.0624	71.1771	83.729	174.64	62.6198	129.185	-1.04518	0.0399491	0.271498	-	5	8179703	8181107	-	1253	protein_coding	PF01494:FAD binding domain	FAD_binding_3
AT3G16660	589.944	613.072	903.001	1586.23	601.508	1244.61	-1.04913	0.000729326	0.021547	-	3	5676749	5678099	+	1009	protein_coding	-	-
AT3G08040	81.5679	79.7184	179.116	155.006	80.6431	167.061	-1.05062	0.00405522	0.0667592	DTX43	3	2566196	2569700	-	2281	protein_coding	PF01554:MatE	MatE
AT3G50930	534.933	536.201	656.054	1564.53	535.567	1110.29	-1.0519	0.0067304	0.0934652	HSR4	3	18929526	18932181	+	2656	protein_coding	PF00004:ATPase family associated with various cellular activities (AAA)|PF14363:Domain associated at C-terminal with AAA	AAA
AT1G10960	4255.76	3649.96	6166.27	10234.5	3952.86	8200.4	-1.05281	0.000178273	0.00818055	FD1	1	3664187	3665040	+	854	protein_coding	PF00111:2Fe-2S iron-sulfur cluster binding domain	Fer2
AT1G62630	168.827	113.883	237.409	349.28	141.355	293.344	-1.05346	0.00457459	0.0727517	-	1	23185760	23189224	+	3465	protein_coding	PF00931:NB-ARC domain|PF13855:Leucine rich repeat	NB-ARC
AT1G80370	82.5163	104.393	251.187	137.439	93.4547	194.313	-1.05572	0.0144575	0.150701	CYCA2-4	1	30213705	30217102	+	1829	protein_coding	PF00134:Cyclin, N-terminal domain|PF02984:Cyclin, C-terminal domain	Cyclin_C
AT5G64870	59.7532	104.393	135.662	206.675	82.0732	171.168	-1.06069	0.0191831	0.180064	FLOT3	5	25929432	25931384	-	1860	protein_coding	PF01145:SPFH domain / Band 7 family	-
AT5G06790	47.4232	51.2475	77.3698	130.205	49.3354	103.787	-1.07336	0.0286767	0.228512	-	5	2097669	2099055	-	1387	protein_coding	PF05553:Cotton fibre expressed protein	-
AT5G38865	136.579	118.629	290.402	246.976	127.604	268.689	-1.07414	0.000715818	0.0213076	-	5	15561891	15562982	-	1000	protein_coding	-	-
AT4G01080	280.745	270.473	448.321	721.295	275.609	584.808	-1.0855	0.000573105	0.0183717	TBL26	4	466298	468294	-	1676	protein_coding	PF13839:GDSL/SGNH-like Acyl-Esterase family found in Pmr5 and Cas1p|PF14416:PMR5 N terminal Domain	-
AT5G13730	304.457	305.587	441.962	854.6	305.022	648.281	-1.08786	0.0021508	0.0437443	SIGD	5	4429095	4430901	-	1454	protein_coding	PF04545:Sigma-70, region 4|PF04539:Sigma-70 region 3|PF04542:Sigma-70 region 2	Sigma70_r2
AT3G19480	240.91	243.9	349.754	680.993	242.405	515.373	-1.08839	0.00297816	0.0545906	PGDH3	3	6752422	6754785	+	2070	protein_coding	PF00389:D-isomer specific 2-hydroxyacid dehydrogenase, catalytic domain|PF01842:ACT domain|PF02826:D-isomer specific 2-hydroxyacid dehydrogenase, NAD binding domain	2-Hacid_dh_C
AT2G39730	24023.6	18732.9	30808	60152.7	21378.3	45480.3	-1.0891	0.00079019	0.0226307	RCA	2	16570746	16573692	-	2101	protein_coding	PF00004:ATPase family associated with various cellular activities (AAA)	AAA
AT5G06630	330.065	265.728	1023.83	244.909	297.897	634.367	-1.09037	0.0433071	0.282065	-	5	2036312	2037855	-	1544	protein_coding	PF04554:Extensin-like region	-
AT1G62750	3607.96	3311.16	5324.74	9462.6	3459.56	7393.67	-1.09572	0.000198774	0.00886238	CPEFG	1	23233434	23236447	-	2666	protein_coding	PF00009:Elongation factor Tu GTP binding domain|PF14492:Elongation Factor G, domain II|PF00679:Elongation factor G C-terminus|PF03764:Elongation factor G, domain IV|PF03144:Elongation factor Tu domain 2	GTP_EFTU
AT4G12320	799.555	878.8	1284.55	2303.39	839.178	1793.97	-1.09617	0.000410339	0.0144219	CYP706A6	4	7313779	7316871	-	2941	protein_coding	PF00067:Cytochrome P450	p450
AT3G14415	4029.07	2969.51	5929.92	9118.49	3499.29	7524.2	-1.10449	8.45e-05	0.00470054	-	3	4818251	4821013	+	1729	protein_coding	PF01070:FMN-dependent dehydrogenase	FMN_dh
AT2G45900	328.168	398.592	865.906	697.527	363.38	781.716	-1.10509	2.19e-05	0.00168152	-	2	18885751	18889178	-	2927	protein_coding	PF14309:Domain of unknown function (DUF4378)	-
AT3G01500	9066.36	5354.42	10505.3	20543.5	7210.39	15524.4	-1.10639	0.00218242	0.0441675	BCA1	3	194426	198664	-	3266	protein_coding	PF00484:Carbonic anhydrase	-
AT2G38070	43.6293	46.5024	103.866	90.9369	45.0659	97.4016	-1.11178	0.0146234	0.15181	-	2	15928591	15930817	+	2227	protein_coding	PF05340:Protein of unknown function (DUF740)	-
AT3G16670	1437.87	2157.14	4254.28	3531.04	1797.51	3892.66	-1.11475	2.38e-05	0.00180705	-	3	5681380	5682362	+	836	protein_coding	-	-
AT3G26740	4343.01	4872.31	10766.1	9300.36	4607.66	10033.2	-1.12267	1.2e-08	3.59e-06	CCL	3	9827682	9828917	+	1068	protein_coding	PF07207:Light regulated protein Lir1	-
AT3G25250	174.517	195.5	178.057	628.291	185.009	403.174	-1.12402	0.0309692	0.237117	OXI1	3	9195334	9197126	+	1675	protein_coding	PF00069:Protein kinase domain	Pkinase
AT1G43790	76.8256	86.3616	164.278	192.207	81.5936	178.243	-1.12746	0.00193658	0.0409957	TED6	1	16575759	16576541	+	783	protein_coding	-	-
AT3G55710	34.1447	36.0631	67.8311	85.77	35.1039	76.8005	-1.12973	0.0270955	0.222741	UGT76F2	3	20673564	20676021	+	1888	protein_coding	PF00201:UDP-glucoronosyl and UDP-glucosyl transferase	UDPGT
AT3G29240	558.645	409.98	802.314	1317.55	484.313	1059.93	-1.13005	0.000410231	0.0144219	-	3	11191263	11193044	+	1647	protein_coding	PF02622:Uncharacterized ACR, COG1678	-
AT2G19900	55.9594	57.8907	130.363	118.838	56.925	124.6	-1.13008	0.00584498	0.0854097	NADP-ME1	2	8591808	8595559	-	2226	protein_coding	PF00390:Malic enzyme, N-terminal domain|PF03949:Malic enzyme, NAD binding domain	Malic_M
AT3G25690	2111.28	1897.11	3786.88	4990.16	2004.19	4388.52	-1.13074	5.94e-07	9.39e-05	CHUP1	3	9352444	9357953	+	4447	protein_coding	-	-
AT4G12830	154.6	135.711	207.733	432.983	145.155	320.358	-1.14235	0.00582616	0.0852892	-	4	7531141	7533587	+	1490	protein_coding	PF00561:alpha/beta hydrolase fold	Abhydrolase_1
AT2G42690	467.593	401.439	776.878	1142.91	434.516	959.894	-1.14356	5.62e-05	0.00333622	-	2	17776241	17777717	-	1389	protein_coding	PF01764:Lipase (class 3)	Lipase_3
AT4G26150	101.486	102.495	198.194	253.176	101.99	225.685	-1.14607	0.000823787	0.0232073	GATA22	4	13253084	13255106	+	1632	protein_coding	PF00320:GATA zinc finger	GATA
AT5G60020	63.5471	80.6674	187.595	133.305	72.1072	160.45	-1.15366	0.00483375	0.0750095	LAC17	5	24167996	24170462	+	2090	protein_coding	PF00394:Multicopper oxidase|PF07732:Multicopper oxidase|PF07731:Multicopper oxidase	-
AT1G64450	62.5986	60.7378	190.775	84.7366	61.6682	137.756	-1.15907	0.0233939	0.203019	-	1	23941598	23942900	-	1303	protein_coding	-	-
AT4G31850	460.953	409.98	853.188	1095.38	435.467	974.282	-1.16186	3.43e-06	0.000395189	PGR3	4	15402768	15406493	+	3726	protein_coding	PF13041:PPR repeat family|PF13812:Pentatricopeptide repeat domain|PF12854:PPR repeat	-
AT3G20570	126.146	133.813	374.131	209.775	129.979	291.953	-1.16719	0.0023512	0.0465678	ENODL9	3	7186522	7187521	-	912	protein_coding	PF02298:Plastocyanin-like domain	Cu_bind_like
AT3G06880	709.451	787.694	1476.39	1885.91	748.572	1681.15	-1.16729	5.56e-07	9.02e-05	-	3	2169768	2175771	-	4752	protein_coding	-	-
AT1G75460	551.057	575.111	1151.01	1379.55	563.084	1265.28	-1.16809	2.04e-07	3.69e-05	-	1	28327698	28329764	+	2067	protein_coding	PF02190:ATP-dependent protease La (LON) substrate-binding domain	-
AT5G51890	144.166	188.857	361.412	387.515	166.512	374.464	-1.16925	9.24e-05	0.00493784	PER66	5	21090956	21092410	-	1251	protein_coding	PF00141:Peroxidase	-
AT2G32540	262.724	307.485	443.022	843.233	285.105	643.127	-1.17377	0.000995667	0.0262004	CSLB4	2	13814543	13818410	+	2532	protein_coding	PF03552:Cellulose synthase	-
AT1G26761	73.9802	111.985	178.057	242.843	92.9828	210.45	-1.17864	0.00290196	0.0536271	-	1	9250041	9251659	-	1619	protein_coding	-	-
AT5G56860	396.458	376.764	948.575	806.031	386.611	877.303	-1.18212	5.11e-07	8.41e-05	GATA21	5	22989216	22991530	-	1790	protein_coding	PF00320:GATA zinc finger	GATA
AT1G23205	231.425	212.582	503.434	504.286	222.004	503.86	-1.18244	3.6e-06	0.000408243	-	1	8233953	8235019	-	1067	protein_coding	PF04043:Plant invertase/pectin methylesterase inhibitor	-
AT4G38530	41.7324	46.5024	121.884	78.5364	44.1174	100.21	-1.18324	0.01557	0.158169	PLC3	4	18020567	18022985	+	1923	protein_coding	PF00388:Phosphatidylinositol-specific phospholipase C, X domain|PF00387:Phosphatidylinositol-specific phospholipase C, Y domain|PF00168:C2 domain	PI-PLC-X
AT2G05895	33.1962	28.4709	79.4895	60.969	30.8335	70.2293	-1.18729	0.0278689	0.225406	-	2	5587757	5588175	+	419	lncRNA	-	-
AT1G52100	173.569	127.17	282.983	403.016	150.369	342.999	-1.18986	0.000566676	0.0182229	-	1	19383078	19385602	-	2173	protein_coding	PF01419:Jacalin-like lectin domain	-
AT1G52690	24.6601	30.3689	66.7712	58.9023	27.5145	62.8367	-1.19129	0.0332108	0.245356	LEA7	1	19619724	19621534	+	904	protein_coding	-	-
AT2G32880	89.1556	100.597	182.296	251.11	94.8763	216.703	-1.19183	0.00102947	0.0267114	-	2	13948733	13950745	-	1532	protein_coding	PF00917:MATH domain	MATH
AT5G62140	296.869	255.289	539.469	722.328	276.079	630.898	-1.19244	1.96e-05	0.00153946	-	5	24954216	24955503	-	1200	protein_coding	-	-
AT2G37090	60.7017	57.8907	188.655	82.6699	59.2962	135.663	-1.19357	0.0211256	0.189953	IRX9	2	15587394	15589369	-	1479	protein_coding	PF03360:Glycosyltransferase family 43	-
AT3G14420	6415.41	5049.78	9778.27	16469.9	5732.59	13124.1	-1.19497	4e-05	0.00255833	GLO1	3	4821391	4824178	+	1892	protein_coding	PF01070:FMN-dependent dehydrogenase	FMN_dh
AT3G18660	26.557	37.0121	84.7888	60.969	31.7845	72.8789	-1.19688	0.0297902	0.232481	GUX1	3	6419013	6422141	-	2360	protein_coding	PF01501:Glycosyl transferase family 8	Glyco_transf_8
AT3G52720	162.187	161.335	372.011	372.014	161.761	372.013	-1.20149	1.35e-05	0.00113134	ACA1	3	19538540	19542286	-	2940	protein_coding	PF00194:Eukaryotic-type carbonic anhydrase	-
AT1G59660	231.425	304.638	435.603	798.798	268.032	617.2	-1.20349	0.000807265	0.0229653	NUP98B	1	21923986	21929437	+	3622	protein_coding	PF04096:Nucleoporin autopeptidase	-
AT5G49730	47.4232	39.8592	85.8487	116.771	43.6412	101.31	-1.21529	0.0102422	0.122165	FRO6	5	20201037	20204595	-	2757	protein_coding	PF08022:FAD-binding domain|PF08030:Ferric reductase NAD binding domain|PF01794:Ferric reductase like transmembrane component	FAD_binding_8
AT3G10740	307.302	325.517	816.093	658.259	316.409	737.176	-1.22012	1.3e-06	0.000176448	ASD1	3	3360711	3365739	-	3523	protein_coding	PF06964:Alpha-L-arabinofuranosidase C-terminal domain	-
AT1G15980	899.144	566.57	1296.21	2121.52	732.857	1708.86	-1.22148	0.00023806	0.00964917	PNSB1	1	5489145	5491363	+	1719	protein_coding	-	-
AT4G19170	78.7225	77.8203	193.954	171.54	78.2714	182.747	-1.22318	0.000640104	0.0198682	CCD4	4	10481619	10483879	+	2261	protein_coding	PF03055:Retinal pigment epithelial membrane protein	RPE65
AT1G74870	103.383	92.0558	89.0283	367.881	97.7191	228.455	-1.2255	0.0402974	0.27264	-	1	28126928	28128790	+	1550	protein_coding	PF14570:RING/Ubox like zinc-binding domain	-
AT5G13630	5243.11	4822.96	8531.88	15102.8	5033.03	11817.3	-1.23141	2.46e-05	0.00181859	CHLH	5	4387307	4392429	-	4757	protein_coding	PF02514:CobN/Magnesium Chelatase|PF11965:Domain of unknown function (DUF3479)	-
AT1G27480	418.272	331.211	752.501	1008.57	374.742	880.537	-1.23257	7.62e-06	0.000745879	LCAT1	1	9544410	9546285	+	1613	protein_coding	PF02450:Lecithin:cholesterol acyltransferase	-
AT1G64110	43.6293	34.165	124.004	58.9023	38.8972	91.453	-1.23286	0.0299643	0.232854	-	1	23796698	23801799	-	3004	protein_coding	PF00004:ATPase family associated with various cellular activities (AAA)	AAA
AT5G24280	224.786	317.925	436.663	840.133	271.355	638.398	-1.23442	0.00103876	0.0268448	GMI1	5	8251220	8262603	-	5146	protein_coding	PF13589:Histidine kinase-, DNA gyrase B-, and HSP90-like ATPase	-
AT1G26820	39.8355	40.8082	118.704	71.3028	40.3218	95.0036	-1.236	0.015584	0.158169	RNS3	1	9292446	9293862	-	1123	protein_coding	PF00445:Ribonuclease T2 family	Ribonuclease_T2
AT4G08160	35.0932	27.5218	82.6691	65.1025	31.3075	73.8858	-1.23854	0.0205024	0.18732	XYN3	4	5159033	5162867	-	2621	protein_coding	PF00331:Glycosyl hydrolase family 10|PF02018:Carbohydrate binding domain	-
AT4G35970	40.7839	34.165	94.3276	82.6699	37.4745	88.4987	-1.23961	0.0106275	0.124363	APX5	4	17028586	17030558	+	1352	protein_coding	PF00141:Peroxidase	-
AT1G02335	59.7532	72.1262	180.176	132.272	65.9397	156.224	-1.24416	0.00226529	0.0453947	GL22	1	463754	464981	-	990	protein_coding	PF00190:Cupin	-
AT1G73370	74.9286	68.33	198.194	141.572	71.6293	169.883	-1.24565	0.00162538	0.0365763	SUS6	1	27584364	27588978	-	3508	protein_coding	PF00534:Glycosyl transferases group 1|PF00862:Sucrose synthase	Glycos_transf_1
AT5G04890	34.1447	32.267	62.5318	95.0703	33.2058	78.8011	-1.24716	0.019486	0.181857	RTM2	5	1427117	1428514	+	1325	protein_coding	PF00011:Hsp20/alpha crystallin family	-
AT5G33355	89.1556	46.5024	163.219	159.139	67.829	161.179	-1.24866	0.00550892	0.0827149	-	5	12599250	12599944	+	585	protein_coding	-	-
AT1G23310	8574.11	7259.12	14140.7	23535.1	7916.61	18837.9	-1.25069	8.22e-06	0.000777023	GGAT1	1	8268385	8272021	-	2205	protein_coding	PF00155:Aminotransferase class I and II	Aminotran_1_2
AT5G14940	63.5471	48.4005	133.542	133.305	55.9738	133.424	-1.25318	0.00260267	0.0500437	NPF5.8	5	4831583	4834532	-	2044	protein_coding	PF00854:POT family	-
AT2G32290	54.0624	68.33	115.525	176.707	61.1962	146.116	-1.25592	0.00416414	0.0681343	BAM6	2	13714516	13717002	-	1957	protein_coding	PF01373:Glycosyl hydrolase family 14	-
AT2G21330	2896.61	2675.31	3749.79	9584.54	2785.96	6667.16	-1.25892	0.00104876	0.0269137	FBA1	2	9128122	9130619	-	2043	protein_coding	PF00274:Fructose-bisphosphate aldolase class-I	-
AT3G48200	664.873	647.237	1282.43	1871.44	656.055	1576.94	-1.2653	1.27e-06	0.000173854	-	3	17832770	17837998	-	4073	protein_coding	-	-
AT1G69440	125.197	143.303	319.018	328.613	134.25	323.815	-1.27027	1.78e-05	0.00141752	AGO7	1	26101407	26105328	-	3443	protein_coding	PF02171:Piwi domain|PF16486:N-terminal domain of argonaute|PF08699:Argonaute linker 1 domain|PF02170:PAZ domain|PF16488:Argonaute linker 2 domain	Piwi
AT5G47610	45.5263	74.0242	152.62	136.405	59.7752	144.513	-1.27351	0.00355217	0.0612113	ATL79	5	19301130	19302117	-	988	protein_coding	PF13639:Ring finger domain	-
AT5G22800	1035.72	1062.91	1901.39	3178.66	1049.32	2540.02	-1.27544	8.55e-06	0.000800603	EMB86	5	7615747	7620278	-	3694	protein_coding	PF07973:Threonyl and Alanyl tRNA synthetase second additional domain|PF02272:DHHA1 domain|PF01411:tRNA synthetases class II (A)	-
AT1G32060	4225.41	3412.71	7541.97	10968.2	3819.06	9255.1	-1.27704	5.92e-07	9.39e-05	PRK	1	11532199	11534639	+	1890	protein_coding	PF00485:Phosphoribulokinase / Uridine kinase family	-
AT5G45820	45.5263	37.9611	73.1304	129.172	41.7437	101.151	-1.2773	0.0134811	0.143827	CIPK20	5	18586870	18588792	-	1923	protein_coding	PF00069:Protein kinase domain|PF03822:NAF domain	Pkinase
AT3G30720	40.7839	45.5534	86.9086	122.971	43.1687	104.94	-1.28182	0.00666569	0.0927834	QQS	3	12349047	12349933	+	687	protein_coding	-	-
AT4G37925	290.23	217.328	480.117	762.63	253.779	621.373	-1.29202	9.21e-05	0.00493784	NDHM	4	17830533	17831619	-	1003	protein_coding	PF10664:Cyanobacterial and plastid NDH-1 subunit M	-
AT4G35770	151.754	160.386	537.349	228.376	156.07	382.862	-1.2944	0.0027252	0.0516699	STR15	4	16944878	16946266	+	1297	protein_coding	PF00581:Rhodanese-like domain	Rhodanese
AT1G49470	105.279	74.9732	170.638	271.777	90.1264	221.207	-1.29563	0.00150266	0.0344768	-	1	18310428	18311714	+	1287	protein_coding	PF04819:Family of unknown function (DUF716)	-
AT1G22380	19.9177	26.5728	65.7113	48.5685	23.2453	57.1399	-1.29727	0.0325946	0.243438	UGT85A3	1	7900355	7902427	-	1729	protein_coding	PF00201:UDP-glucoronosyl and UDP-glucosyl transferase	UDPGT
AT4G10120	270.312	302.74	471.638	938.303	286.526	704.97	-1.29904	0.000342329	0.0126101	SPS4	4	6313914	6320094	+	4749	protein_coding	PF00534:Glycosyl transferases group 1|PF05116:Sucrose-6F-phosphate phosphohydrolase|PF00862:Sucrose synthase	Glycos_transf_1
AT3G15570	109.073	114.832	269.205	283.144	111.953	276.174	-1.30273	2.44e-05	0.00181075	-	3	5269849	5271984	-	2061	protein_coding	PF03000:NPH3 family	-
AT2G27140	58.8047	34.165	126.123	103.337	46.4849	114.73	-1.30324	0.0073364	0.0988841	-	2	11598305	11599322	-	924	protein_coding	PF00011:Hsp20/alpha crystallin family	-
AT3G47430	110.022	154.692	257.546	396.815	132.357	327.181	-1.30586	0.000396305	0.0140937	PEX11B	3	17480521	17481800	+	1069	protein_coding	PF05648:Peroxisomal biogenesis factor 11 (PEX11)	-
AT3G56970	17.0723	25.6238	59.3522	46.5018	21.3481	52.927	-1.30967	0.0382833	0.265433	ORG2	3	21084035	21085245	-	1082	protein_coding	PF00010:Helix-loop-helix DNA-binding domain	HLH
AT4G25780	44.5778	37.0121	84.7888	117.805	40.795	101.297	-1.31241	0.00640458	0.090567	-	4	13120824	13122042	+	1219	protein_coding	PF00188:Cysteine-rich secretory protein family	SCP
AT4G33120	91.0525	94.9028	375.191	89.9035	92.9777	232.547	-1.32227	0.0274497	0.224299	-	4	15975343	15978136	-	1383	protein_coding	PF02353:Mycolic acid cyclopropane synthetase	-
AT2G38230	538.727	515.322	837.29	1800.14	527.025	1318.71	-1.32327	0.000246721	0.0099174	PDX11	2	16011233	16012515	+	1283	protein_coding	PF01680:SOR/SNZ family	-
AT4G16690	127.094	115.781	229.99	381.315	121.438	305.652	-1.33192	0.000302077	0.0114442	PPD	4	9391964	9393650	-	1456	protein_coding	PF12697:Alpha/beta hydrolase family	-
AT1G64500	66.3925	51.2475	111.285	184.974	58.82	148.13	-1.33281	0.00344363	0.0600502	-	1	23953099	23954610	+	1512	protein_coding	PF00462:Glutaredoxin	-
AT5G23660	262.724	273.32	545.828	804.998	268.022	675.413	-1.33355	4.96e-06	0.000527476	SWEET12	5	7971647	7973995	-	1346	protein_coding	PF03083:Sugar efflux transporter for intercellular exchange	-
AT4G24700	21.8147	17.0825	42.3944	55.8022	19.4486	49.0983	-1.33628	0.0381888	0.265346	-	4	12744570	12745352	-	783	protein_coding	-	-
AT3G62410	1032.88	652.932	1468.97	2805.61	842.904	2137.29	-1.34238	0.000185064	0.0084165	CP12-2	3	23090944	23091580	+	637	protein_coding	PF02672:CP12 domain	-
AT3G48280	57.8563	69.2791	129.303	194.274	63.5677	161.789	-1.34804	0.00137057	0.0323175	CYP71A25	3	17879542	17881388	+	1749	protein_coding	PF00067:Cytochrome P450	p450
AT5G02950	26.557	38.9102	62.5318	105.404	32.7336	83.9679	-1.35949	0.0153765	0.156837	-	5	690685	693099	+	2415	protein_coding	PF00855:PWWP domain	PWWP
AT1G68010	1637.05	1403.61	2646.47	5198.9	1520.33	3922.69	-1.36749	2.88e-05	0.00202981	HPR	1	25493193	25496053	+	1790	protein_coding	PF02826:D-isomer specific 2-hydroxyacid dehydrogenase, NAD binding domain|PF00389:D-isomer specific 2-hydroxyacid dehydrogenase, catalytic domain	2-Hacid_dh_C
AT5G04140	8293.37	6533.11	13181.5	25122.3	7413.24	19151.9	-1.36932	1.77e-05	0.00141027	GLU1	5	1129785	1138488	+	5495	protein_coding	PF00310:Glutamine amidotransferases class-II|PF01645:Conserved region in glutamate synthase|PF01493:GXGXG motif|PF04898:Glutamate synthase central domain	GATase_2
AT3G48390	15.1754	23.7257	48.7536	52.702	19.4506	50.7278	-1.38307	0.0318398	0.240388	-	3	17920795	17923496	+	2364	protein_coding	PF02847:MA3 domain	-
AT1G21680	1069.87	948.079	1766.79	3527.94	1008.97	2647.36	-1.39171	2.99e-05	0.00206978	-	1	7612834	7615374	+	2541	protein_coding	PF07676:WD40-like Beta Propeller Repeat	PD40
AT5G56370	16.1239	43.6553	84.7888	72.3361	29.8896	78.5625	-1.39412	0.0270757	0.222669	-	5	22835931	22837972	-	1796	protein_coding	PF08387:FBD|PF07723:Leucine Rich Repeat|PF00646:F-box domain	LRR_2
AT4G25200	36.9901	33.216	41.3346	145.706	35.103	93.5201	-1.41422	0.036178	0.257047	HSP23.6	4	12916926	12918110	+	1048	protein_coding	PF00011:Hsp20/alpha crystallin family	-
AT5G03260	65.444	68.33	188.655	169.473	66.887	179.064	-1.42059	0.000111992	0.00570295	LAC11	5	777021	779424	-	1937	protein_coding	PF07732:Multicopper oxidase|PF07731:Multicopper oxidase|PF00394:Multicopper oxidase	-
AT3G58350	14.227	20.8786	45.574	48.5685	17.5528	47.0713	-1.42323	0.0315571	0.239464	RTM3	3	21591409	21592962	-	1241	protein_coding	PF00917:MATH domain	MATH
AT5G52300	19.9177	34.165	86.9086	58.9023	27.0414	72.9054	-1.43056	0.0156551	0.158491	LTI65	5	21237021	21239531	+	2171	protein_coding	PF07918:CAP160 repeat	-
AT1G68110	57.8563	43.6553	136.722	138.472	50.7558	137.597	-1.4388	0.000607708	0.0192096	-	1	25524718	25526150	+	1433	protein_coding	PF07651:ANTH domain	-
AT5G60780	11.3816	18.0315	41.3346	39.2682	14.7066	40.3014	-1.45434	0.0425395	0.280088	NRT2.3	5	24450745	24452964	+	1922	protein_coding	PF07690:Major Facilitator Superfamily	MFS_1
AT4G09950	32.2478	28.4709	71.0106	98.1705	30.3593	84.5906	-1.47865	0.00459849	0.0729151	IAN13	4	6234671	6236560	+	1454	protein_coding	PF04548:AIG1 family	-
AT1G54790	14.227	14.2354	52.993	26.8677	14.2312	39.9304	-1.48782	0.0496912	0.303929	-	1	20440979	20444066	-	1911	protein_coding	PF00657:GDSL-like Lipase/Acylhydrolase	Lipase_GDSL
AT4G33010	4753.7	3970.74	9715.74	14778.3	4362.22	12247	-1.48931	1.21e-08	3.59e-06	GLDP1	4	15926652	15931422	-	3586	protein_coding	PF02347:Glycine cleavage system P-protein	-
AT3G05620	19.9177	9.49028	46.6339	36.1681	14.704	41.401	-1.49319	0.0464693	0.29224	PME22	3	1629488	1631818	-	1854	protein_coding	PF04043:Plant invertase/pectin methylesterase inhibitor|PF01095:Pectinesterase	-
AT5G15780	406.891	511.526	1650.2	948.637	459.209	1299.42	-1.50057	2.92e-06	0.000344587	-	5	5144629	5146458	-	1636	protein_coding	PF01190:Pollen proteins Ole e I like	-
AT1G31173	10.4331	19.9296	48.7536	37.2014	15.1813	42.9775	-1.50106	0.0395787	0.270123	MIR167D	1	11137539	11137915	+	377	miRNA	-	-
AT5G49740	80.6194	62.6359	173.817	234.576	71.6276	204.196	-1.51157	9.13e-05	0.00493477	FRO7	5	20205302	20208777	-	2923	protein_coding	PF01794:Ferric reductase like transmembrane component|PF08022:FAD-binding domain|PF08030:Ferric reductase NAD binding domain	FAD_binding_8
AT2G13360	4213.08	2966.66	6576.43	14077.6	3589.87	10327	-1.52443	2.09e-05	0.00161193	AGT1	2	5538740	5541479	-	2083	protein_coding	PF00266:Aminotransferase class-V	Aminotran_5
AT4G39790	19.9177	20.8786	77.3698	40.3016	20.3982	58.8357	-1.52771	0.0191644	0.180008	-	4	18462190	18464982	-	2498	protein_coding	PF04782:Protein of unknown function (DUF632)|PF04783:Protein of unknown function (DUF630)	-
AT5G25370	25.6085	23.7257	71.0106	72.3361	24.6671	71.6734	-1.53886	0.00455885	0.0725579	PLDALPHA3	5	8803829	8807783	-	3189	protein_coding	PF00168:C2 domain|PF12357:Phospholipase D C terminal|PF00614:Phospholipase D Active site motif	C2
AT4G28080	1895.03	1925.58	4680.34	6453.42	1910.3	5566.88	-1.54309	2.74e-11	1.8e-08	TSS	4	13948603	13958107	-	6117	protein_coding	PF15044:Mitochondrial function, CLU-N-term|PF13424:Tetratricopeptide repeat|PF12807:Translation initiation factor eIF3 subunit 135	-
AT4G13390	302.56	332.16	1489.1	366.848	317.36	927.976	-1.54787	0.00293896	0.0540142	-	4	7783791	7785366	+	1576	protein_coding	PF04554:Extensin-like region	-
AT4G22200	120.455	181.264	453.62	434.017	150.86	443.819	-1.55675	8.92e-07	0.000132062	AKT2	4	11746490	11750698	-	3284	protein_coding	PF11834:KHA, dimerisation domain of potassium ion channel|PF12796:Ankyrin repeats (3 copies)|PF00520:Ion transport protein|PF00027:Cyclic nucleotide-binding domain	Ion_trans
AT5G24150	178.311	227.767	532.05	671.693	203.039	601.871	-1.5678	4.86e-08	1.13e-05	SQE5	5	8172300	8175525	-	1975	protein_coding	PF13450:NAD(P)-binding Rossmann-like domain|PF08491:Squalene epoxidase	-
AT1G52560	31.2993	21.8277	105.986	52.702	26.5635	79.344	-1.57818	0.00975066	0.118471	HSP26.5	1	19574538	19575866	-	1044	protein_coding	PF00011:Hsp20/alpha crystallin family	-
AT5G53870	49.3201	56.9417	179.116	140.539	53.1309	159.828	-1.5887	9.13e-05	0.00493477	ENODL1	5	21869774	21871391	-	1535	protein_coding	PF02298:Plastocyanin-like domain	Cu_bind_like
AT2G45135	12.33	9.49028	28.6162	38.2348	10.9102	33.4255	-1.61557	0.0408179	0.273608	-	2	18608824	18610574	+	1183	protein_coding	-	-
AT3G47400	39.8355	44.6043	175.937	86.8034	42.2199	131.37	-1.63724	0.00148112	0.0341744	PME33	3	17465510	17468118	+	2134	protein_coding	PF04043:Plant invertase/pectin methylesterase inhibitor|PF01095:Pectinesterase	-
AT5G14740	3126.14	2046.11	5190.14	11091.2	2586.12	8140.67	-1.65437	6.66e-06	0.000663412	BCA2	5	4757856	4762666	+	3095	protein_coding	PF00484:Carbonic anhydrase	-
AT5G49360	221.94	275.218	1119.21	460.885	248.579	790.049	-1.66811	5.71e-05	0.00337787	BXL1	5	20011812	20016857	-	2890	protein_coding	PF00933:Glycosyl hydrolase family 3 N terminal domain|PF14310:Fibronectin type III-like domain|PF01915:Glycosyl hydrolase family 3 C-terminal domain	Glyco_hydro_3_C
AT2G41240	18.9693	26.5728	20.1373	125.038	22.771	72.5878	-1.6731	0.0496131	0.303838	BHLH100	2	17198037	17199454	-	1157	protein_coding	PF00010:Helix-loop-helix DNA-binding domain	HLH
AT3G60140	58.8047	89.2087	52.993	419.55	74.0067	236.271	-1.67496	0.0250107	0.211565	BGLU30	3	22216540	22220824	+	2335	protein_coding	PF00232:Glycosyl hydrolase family 1	Glyco_hydro_1
AT4G26530	278.848	130.966	470.578	839.099	204.907	654.839	-1.67626	9.13e-05	0.00493477	FBA5	4	13390754	13393265	+	2217	protein_coding	PF00274:Fructose-bisphosphate aldolase class-I	-
AT5G13770	208.662	197.398	498.134	799.831	203.03	648.983	-1.67663	1.36e-07	2.86e-05	-	5	4445423	4447476	+	2054	protein_coding	PF13812:Pentatricopeptide repeat domain	-
AT3G01600	54.0624	110.087	147.321	385.448	82.0749	266.384	-1.69874	0.001778	0.0385423	anac044	3	229075	231517	+	1725	protein_coding	PF02365:No apical meristem (NAM) protein	NAM
AT1G69430	9.48464	10.4393	29.6761	35.1347	9.96197	32.4054	-1.70192	0.0328046	0.244033	-	1	26097729	26099388	+	1660	protein_coding	-	-
AT5G13170	28.4539	29.4199	82.6691	108.504	28.9369	95.5867	-1.72415	0.000597157	0.0189641	SWEET15	5	4181042	4183354	-	1351	protein_coding	PF03083:Sugar efflux transporter for intercellular exchange	-
AT4G24000	26.557	27.5218	119.764	59.9357	27.0394	89.8499	-1.73198	0.00279347	0.052604	CSLG2	4	12461907	12465675	+	2719	protein_coding	PF03552:Cellulose synthase	-
AT5G52940	31.2993	30.3689	19.0775	186.007	30.8341	102.542	-1.73404	0.0476335	0.29678	-	5	21472103	21473602	+	1500	protein_coding	-	-
AT4G32510	7.58771	12.3374	21.1972	45.4684	9.96254	33.3328	-1.74302	0.0443625	0.285527	-	4	15685379	15689293	-	2747	protein_coding	PF00955:HCO3- transporter family	-
AT5G11360	8.53617	12.3374	44.5141	26.8677	10.4368	35.6909	-1.77343	0.0278325	0.225406	-	5	3625570	3626735	-	988	protein_coding	-	-
AT1G05310	9.48464	14.2354	32.8557	48.5685	11.86	40.7121	-1.77974	0.018299	0.174937	PME8	1	1550503	1552587	-	1447	protein_coding	PF01095:Pectinesterase	-
AT1G70440	26.557	25.6238	25.4367	155.006	26.0904	90.2213	-1.79045	0.0268458	0.22185	SRO3	1	26548952	26550636	-	1230	protein_coding	PF12174:RCD1-SRO-TAF4 (RST) plant domain	-
AT5G24070	51.217	19.9296	218.331	33.0679	35.5733	125.7	-1.82075	0.0277817	0.225384	PER61	5	8134172	8136150	-	1311	protein_coding	PF00141:Peroxidase	-
AT1G52050	51.217	50.2985	297.821	66.1359	50.7578	181.978	-1.84173	0.0047917	0.0748096	JAL8	1	19354919	19356901	-	1282	protein_coding	PF01419:Jacalin-like lectin domain	-
AT3G55500	103.383	186.959	499.194	563.188	145.171	531.191	-1.87153	9.96e-08	2.19e-05	EXPA16	3	20574752	20576249	-	1251	protein_coding	PF01357:Pollen allergen|PF03330:Lytic transglycolase	-
AT2G18180	8.53617	33.216	29.6761	124.005	20.8761	76.8404	-1.88048	0.0312689	0.238443	SFH10	2	7910703	7913861	-	2267	protein_coding	PF00650:CRAL/TRIO domain	-
AT1G75260	6.63925	6.6432	26.4965	22.7342	6.64122	24.6154	-1.88987	0.0410674	0.2745	-	1	28247641	28249485	+	1845	protein_coding	-	-
AT5G37490	41.7324	52.1966	24.3768	337.913	46.9645	181.145	-1.94776	0.0256339	0.21532	PUB21	5	14887429	14889151	+	1723	protein_coding	PF04564:U-box domain	U-box
AT5G04690	8.53617	10.4393	29.6761	47.5352	9.48774	38.6056	-2.02512	0.0104139	0.123134	-	5	1349576	1352589	-	2249	protein_coding	PF12796:Ankyrin repeats (3 copies)|PF13962:Domain of unknown function	-
AT1G30220	6.63925	12.3374	46.6339	32.0346	9.48831	39.3342	-2.05127	0.0105479	0.123885	INT2	1	10632720	10635581	-	2122	protein_coding	PF00083:Sugar (and other) transporter	Sugar_tr
AT2G35950	4.74232	12.3374	38.155	33.0679	8.53984	35.6115	-2.05999	0.0162564	0.162723	EDA12	2	15104716	15106119	+	1043	protein_coding	-	-
AT4G37850	27.5054	18.9806	136.722	59.9357	23.243	98.3288	-2.08035	0.000759868	0.0220164	BHLH25	4	17796072	17797901	-	1375	protein_coding	PF00010:Helix-loop-helix DNA-binding domain	HLH
AT1G16905	11.3816	4.74514	57.2325	11.3671	8.06335	34.2998	-2.08795	0.0476238	0.29678	-	1	5782455	5783840	-	1386	protein_coding	PF01453:D-mannose binding lectin	B_lectin
AT3G59250	10.4331	10.4393	22.2571	67.1693	10.4362	44.7132	-2.0998	0.0128541	0.139305	-	3	21901570	21903284	-	1434	protein_coding	PF00646:F-box domain	F-box
AT5G04200	24.6601	37.0121	135.662	129.172	30.8361	132.417	-2.10238	6.31e-06	0.000634613	AMC9	5	1153740	1155040	+	1301	protein_coding	PF00656:Caspase domain	Peptidase_C14
AT3G16440	37.9385	48.4005	276.624	99.2038	43.1695	187.914	-2.12165	0.0001431	0.00685938	ATMLP-300B	3	5585872	5587798	+	1299	protein_coding	PF01419:Jacalin-like lectin domain	-
AT2G37700	20.8662	9.49028	108.106	34.1013	15.1782	71.1035	-2.22737	0.00459082	0.0728963	-	2	15810520	15814218	-	2306	protein_coding	PF04116:Fatty acid hydroxylase superfamily|PF12076:WAX2 C-terminal domain	-
AT5G39160	3.79385	3.79611	18.0176	17.5673	3.79498	17.7925	-2.22907	0.0465177	1	GLP2A	5	15679005	15680141	-	1034	protein_coding	PF00190:Cupin	-
AT1G74420	3.79385	6.6432	34.9754	14.4672	5.21853	24.7213	-2.24337	0.0320836	0.241305	FUT3	1	27967771	27969965	-	1994	protein_coding	PF03254:Xyloglucan fucosyltransferase	-
AT5G58310	32.2478	14.2354	69.9508	150.873	23.2416	110.412	-2.24843	0.000430501	0.0148997	MES18	5	23574992	23576084	-	1004	protein_coding	PF12697:Alpha/beta hydrolase family	-
AT3G03341	7.58771	12.3374	54.0529	42.3683	9.96254	48.2106	-2.27458	0.00191824	0.0408452	-	3	790130	790693	-	564	protein_coding	-	-
AT3G33528	2.84539	5.69417	19.0775	23.7676	4.26978	21.4225	-2.32716	0.0292376	1	-	3	14082640	14084346	-	1080	protein_coding	-	-
AT5G11620	9.48464	1.89806	27.5564	29.9678	5.69135	28.7621	-2.33731	0.0230049	0.200833	-	5	3738729	3740164	-	1161	protein_coding	PF04434:SWIM zinc finger	SWIM
AT5G15500	10.4331	6.6432	43.4543	44.4351	8.53815	43.9447	-2.36368	0.00187784	0.0401524	-	5	5031648	5033540	-	1893	protein_coding	PF12796:Ankyrin repeats (3 copies)|PF13962:Domain of unknown function	-
AT5G48920	12.33	6.6432	52.993	48.5685	9.48661	50.7808	-2.4202	0.000933799	0.0250567	TED7	5	19835337	19836258	+	922	protein_coding	-	-
AT4G33810	7.58771	5.69417	38.155	33.0679	6.64094	35.6115	-2.42272	0.00376638	0.0637649	XYN5	4	16213174	16216310	-	2342	protein_coding	PF00331:Glycosyl hydrolase family 10	-
AT1G61130	2.84539	2.84709	23.3169	10.3337	2.84624	16.8253	-2.56279	0.0399364	1	SCPL32	1	22528853	22531827	-	1606	protein_coding	PF00450:Serine carboxypeptidase	Peptidase_S10
AT3G29633	16.1239	13.2864	43.4543	132.272	14.7051	87.863	-2.57943	0.000297335	0.0113619	-	3	11452509	11453528	-	1020	protein_coding	-	-
AT2G20720	9.48464	8.54126	4.23944	104.371	9.01295	54.3051	-2.59153	0.0285199	0.227847	-	2	8927822	8930120	-	2221	protein_coding	-	-
AT5G07330	5.69078	1.89806	21.1972	24.801	3.79442	22.9991	-2.59968	0.0173833	0.169435	-	5	2315947	2316874	+	848	protein_coding	-	-
AT4G39250	3.79385	4.74514	31.7958	20.6675	4.2695	26.2316	-2.61879	0.00885262	0.110902	RL1	4	18271198	18272129	-	834	protein_coding	PF00249:Myb-like DNA-binding domain	Myb_DNA-binding
AT4G24430	2.84539	6.6432	26.4965	33.0679	4.7443	29.7822	-2.65044	0.00611099	0.0878805	-	4	12629951	12633132	+	2220	protein_coding	PF06045:Rhamnogalacturonate lyase family|PF14683:Polysaccharide lyase family 4, domain III|PF14686:Polysaccharide lyase family 4, domain II	-
AT3G49190	15.1754	14.2354	155.799	43.4017	14.7054	99.6006	-2.75933	0.00015233	0.00718343	-	3	18231845	18234391	-	1727	protein_coding	PF03007:Wax ester synthase-like Acyl-CoA acyltransferase domain|PF06974:Protein of unknown function (DUF1298)	-
AT4G26880	7.58771	3.79611	66.7712	12.4005	5.69191	39.5858	-2.79726	0.00843495	0.108056	-	4	13508042	13508813	-	772	protein_coding	PF04885:Stigma-specific protein, Stig1	-
AT1G05297	1.89693	1.89806	20.1373	8.26699	1.89749	14.2022	-2.90318	0.0393207	1	-	1	5857935	5858271	+	337	lncRNA	-	-
AT3G47180	4.74232	0.949028	24.3768	18.6007	2.84567	21.4888	-2.91641	0.0154393	1	-	3	17372731	17373547	-	817	protein_coding	PF13639:Ring finger domain	-
AT3G54520	2.84539	3.79611	2.11972	48.5685	3.32075	25.3441	-2.93288	0.0412408	0.275298	-	3	20183517	20185202	-	1158	protein_coding	-	-
AT1G06090	41.7324	35.1141	507.673	93.0036	38.4232	300.338	-2.96632	9.52e-06	0.000875749	-	1	1846701	1849693	+	2313	protein_coding	PF00487:Fatty acid desaturase	-
AT1G09500	55.0109	37.9611	52.993	673.759	46.486	363.376	-2.96664	0.0432294	0.282065	-	1	3066674	3068796	+	1931	protein_coding	PF01370:NAD dependent epimerase/dehydratase family	Epimerase
AT3G19920	2.84539	0.949028	9.53874	21.7008	1.89721	15.6198	-3.04198	0.0299975	1	-	3	6929649	6931825	-	1619	protein_coding	-	-
AT2G23410	5.69078	5.69417	69.9508	24.801	5.69248	47.3759	-3.05641	0.00062798	0.0196076	DPS	2	9966127	9967788	-	1079	protein_coding	PF01255:Putative undecaprenyl diphosphate synthase	Prenyltransf
AT1G69325	2.84539	2.84709	29.6761	19.6341	2.84624	24.6551	-3.11439	0.00436454	0.0704537	-	1	26063187	26063877	+	522	protein_coding	PF03763:Remorin, C-terminal region	-
AT3G10680	4.74232	2.84709	37.0951	28.9345	3.7947	33.0148	-3.12079	0.00110099	0.027963	-	3	3337689	3339345	+	1557	protein_coding	PF00011:Hsp20/alpha crystallin family	-
AT3G06460	7.58771	10.4393	137.782	25.8343	9.01351	81.8081	-3.1816	0.000278302	0.010866	-	3	1982659	1983767	+	1109	protein_coding	PF01151:GNS1/SUR4 family	ELO
AT1G60360	4.74232	1.89806	38.155	27.9011	3.32019	33.028	-3.31401	0.000949961	0.0253633	-	1	22242531	22243760	-	1230	protein_coding	PF14369:zinc-ribbon|PF13639:Ring finger domain	-
AT4G21902	0.948464	1.89806	22.2571	6.20024	1.42326	14.2287	-3.32069	0.0313569	1	-	4	11619735	11620201	+	467	protein_coding	-	-
AT1G21850	0.948464	4.74514	2.11972	57.8689	2.8468	29.9943	-3.39798	0.023856	0.205993	sks8	1	7667803	7670530	-	1656	protein_coding	PF07732:Multicopper oxidase|PF00394:Multicopper oxidase|PF07731:Multicopper oxidase	-
AT3G28270	29.4024	59.7888	301	697.527	44.5956	499.264	-3.48499	2.01e-12	1.78e-09	-	3	10538005	10540070	+	2066	protein_coding	PF05055:Protein of unknown function (DUF677)	-
novel.214	1.89693	5.69417	49.8134	57.8689	3.79555	53.8412	-3.82655	9.44e-06	0.000871843	-	5	13949012	13953991	+	4980	-	PF13976:GAG-pre-integrase domain|PF07727:Reverse transcriptase (RNA-dependent DNA polymerase)|PF00665:Integrase core domain|PF14244:gag-polypeptide of LTR copia-type	RVT_2
AT4G10250	3.79385	0	25.4367	31.0012	1.89693	28.2189	-3.89483	0.00207226	0.0427862	HSP22.0	4	6370338	6371372	+	1035	protein_coding	PF00011:Hsp20/alpha crystallin family	-
AT3G05955	0	3.79611	36.0353	20.6675	1.89806	28.3514	-3.9007	0.00243678	0.0478085	-	3	11586005	11586548	-	544	lncRNA	-	-
AT1G75945	5.69078	8.54126	164.278	115.738	7.11602	140.008	-4.29813	8.15e-13	8.32e-10	-	1	28515245	28515916	-	461	protein_coding	-	-
AT2G32620	0.948464	1.89806	40.2747	16.534	1.42326	28.4043	-4.31833	0.000758881	0.0220164	CSLB2	2	13840687	13844425	+	2460	protein_coding	PF03552:Cellulose synthase	-
AT1G51470	19.9177	17.0825	642.275	122.971	18.5001	382.623	-4.37014	8.38e-11	4.89e-08	TGG5	1	19087384	19090523	+	1851	protein_coding	PF00232:Glycosyl hydrolase family 1	Glyco_hydro_1
AT1G05250	5.69078	3.79611	3.17958	220.109	4.74345	111.644	-4.55689	0.0281088	0.22631	PER2	1	1525601	1527360	-	1492	protein_coding	PF00141:Peroxidase	-
AT2G23400	0.948464	0	19.0775	4.13349	0.474232	11.6055	-4.61181	0.0298489	1	-	2	9963809	9965414	-	1123	protein_coding	PF01255:Putative undecaprenyl diphosphate synthase	Prenyltransf
novel.215	0	0	8.47888	4.13349	0	6.30619	-5.17487	0.0450711	1	-	5	14197939	14198540	+	506	-	-	-
AT2G05995	0	1.89806	36.0353	43.4017	0.949028	39.7185	-5.38766	4.22e-05	0.00264762	-	2	2325776	2326876	+	659	ncRNA	-	-
AT1G62935	0	0	12.7183	3.10012	0	7.90922	-5.50136	0.0258577	1	-	1	23308760	23309410	-	651	protein_coding	-	-
AT2G18540	0	0	15.8979	1.03337	0	8.46564	-5.59931	0.0309117	1	-	2	8042096	8045033	-	2435	protein_coding	PF00190:Cupin	-
AT1G47600	10.4331	2.84709	536.289	119.871	6.64009	328.08	-5.62643	2.2e-13	2.49e-10	TGG4	1	17491731	17494779	+	1766	protein_coding	PF00232:Glycosyl hydrolase family 1	Glyco_hydro_1
novel.237	12.33	18.0315	887.103	629.324	15.1808	758.214	-5.64224	1.37e-45	2.79e-41	-	5	14088038	14090093	-	2056	-	-	-
AT1G57800	0	0	5.2993	13.4339	0	9.36658	-5.74664	0.0125529	1	VIM5	1	21408623	21412283	-	2119	protein_coding	PF02182:SAD/SRA domain|PF13445:RING-type zinc-finger	-
AT1G12870	0	0	11.6585	16.534	0	14.0962	-6.33604	0.00176917	1	-	1	4387129	4389110	-	1251	protein_coding	PF00646:F-box domain	F-box
